# Supplementary material for: Eremophilane and cadinane sesquiterpenoids from the fruits of Alpinia oxyphylla and their anti-inflammatory activities
Source: Royal Society of Chemistry journal article supplement (doi:10.1039/d3fo01221b), 2023-01-01
Supplement: d3fo01221b1.pdf [file d3fo01221b1.pdf]

## Electronic supplementary information (ESI)

### Eremophilane and cadinane sesquiterpenoids from the fruits of *Alpinia oxyphylla* and their anti-inflammatory activities

Jie Dong, ‡<sup>a</sup> Mi Zhou, <sup>a, d</sup> Da-bo Pan, <sup>c</sup> Qian-yu Qin, <sup>a</sup> Ting Li, <sup>a</sup> Xin-sheng Yao, <sup>a</sup> Hai-bo Li, <sup>\*b</sup> and Yang Yu <sup>\*a</sup>

<sup>a</sup> Institute of Traditional Chinese Medicine & Natural Products, College of Pharmacy; International Cooperative Laboratory of Traditional Chinese Medicine Modernization and Innovative Drug Development of Ministry of Education (MOE) of China; and Guangdong Province Key Laboratory of Pharmacodynamic Constituents of TCM and New Drugs Research, Jinan University, Guangzhou 510632, China

<sup>b</sup> Kanion Pharmaceutical Co. Ltd., State Key Laboratory of New-tech for Chinese Medicine Pharmaceutical Process, Lianyungang 222001, China

<sup>c</sup> Department of Medical Technology, Qiandongnan Vocational and Technical College for Nationalities, Kaili 556000, China

<sup>d</sup> Shenzhen institute for drug control (shenzhen testing center of medical devices) Shenzhen 518057, China

---

\* Corresponding authors:

Dr. Yang Yu, College of Pharmacy, Jinan University, 601 Huangpu Avenue, Guangzhou 510632, PR China. Tel. +86-20-85225849. E-mail: [1018yuyang@163.com](mailto:1018yuyang@163.com)

Dr. Hai-bo Li, Kanion Pharmaceutical Co. Ltd., Lianyungang 222001, PR China. Tel. +86-0518-81152371. E-mail: [lihaibo1985124@sina.com](mailto:lihaibo1985124@sina.com)

## Contents

|                                                                                                          |    |
|----------------------------------------------------------------------------------------------------------|----|
| S1. Physical constants and spectral data of 1-6, 23-24, 26-29.....                                       | 5  |
| Fig. S1 HR-ESI-MS spectrum of compound 1.....                                                            | 8  |
| Fig. S2 <sup>1</sup> H NMR (600 MHz, CDCl <sub>3</sub> ) spectrum of compound 1.....                     | 8  |
| Fig. S3 <sup>13</sup> C NMR (150 MHz, CDCl <sub>3</sub> ) spectrum of compound 1.....                    | 9  |
| Fig. S4 DEPT (150 MHz, CDCl <sub>3</sub> ) and <sup>13</sup> C NMR spectra of compound 1.....            | 9  |
| Fig. S5 HSQC spectrum of compound 1.....                                                                 | 10 |
| Fig. S6 HMBC spectrum of compound 1.....                                                                 | 11 |
| Fig. S7 <sup>1</sup> H- <sup>1</sup> H COSY spectrum of compound 1.....                                  | 11 |
| Fig. S8 NOESY spectrum of compound 1.....                                                                | 12 |
| Fig. S9 UV spectrum of compound 1.....                                                                   | 13 |
| Fig. S10 IR spectrum of compound 1.....                                                                  | 13 |
| Fig. S11 HR-ESI-MS spectrum of compound 2.....                                                           | 14 |
| Fig. S12 <sup>1</sup> H NMR (600 MHz, CDCl <sub>3</sub> ) spectrum of compound 2.....                    | 14 |
| Fig. S13 <sup>13</sup> C NMR (150 MHz, CDCl <sub>3</sub> ) spectrum of compound 2.....                   | 15 |
| Fig. S14 DEPT (150 MHz, CDCl <sub>3</sub> ) and <sup>13</sup> C NMR spectra of compound 2.....           | 16 |
| Fig. S15 HSQC spectrum of compound 2.....                                                                | 16 |
| Fig. S16 HMBC spectrum of compound 2.....                                                                | 17 |
| Fig. S17 <sup>1</sup> H- <sup>1</sup> H COSY spectrum of compound 2.....                                 | 18 |
| Fig. S18 NOESY spectrum of compound 2.....                                                               | 19 |
| Fig. S19 UV spectrum of compound 2.....                                                                  | 20 |
| Fig. S20 IR spectrum of compound 2.....                                                                  | 20 |
| Fig. S21 HR-ESI-MS spectrum of compound 3.....                                                           | 21 |
| Fig. S22 <sup>1</sup> H NMR (600 MHz, CDCl <sub>3</sub> ) spectrum of compound 3.....                    | 21 |
| Fig. S23 <sup>13</sup> C NMR (150 MHz, CDCl <sub>3</sub> ) spectrum of compound 3.....                   | 22 |
| Fig. S24 DEPT (150 MHz, CDCl <sub>3</sub> ) and <sup>13</sup> C NMR spectra of compound 3.....           | 23 |
| Fig. S25 HSQC spectrum of compound 3.....                                                                | 23 |
| Fig. S26 HMBC spectrum of compound 3.....                                                                | 24 |
| Fig. S27 <sup>1</sup> H- <sup>1</sup> H COSY spectrum of compound 3.....                                 | 24 |
| Fig. S28 NOESY spectrum of compound 3.....                                                               | 25 |
| Fig. S29 UV spectrum of compound 3.....                                                                  | 26 |
| Fig. S30 IR spectrum of compound 3.....                                                                  | 26 |
| Fig. S31 HR-ESI-MS spectrum of compound 4.....                                                           | 27 |
| Fig. S32 <sup>1</sup> H NMR (600 MHz, DMSO- <i>d</i> <sub>6</sub> ) spectrum of compound 4.....          | 27 |
| Fig. S33 <sup>13</sup> C NMR (150 MHz, DMSO- <i>d</i> <sub>6</sub> ) spectrum of compound 4.....         | 28 |
| Fig. S34 DEPT (150 MHz, DMSO- <i>d</i> <sub>6</sub> ) and <sup>13</sup> C NMR spectra of compound 4..... | 29 |
| Fig. S35 HSQC spectrum of compound 4.....                                                                | 29 |
| Fig. S36 HMBC spectrum of compound 4.....                                                                | 30 |
| Fig. S37 <sup>1</sup> H- <sup>1</sup> H COSY spectrum of compound 4.....                                 | 30 |
| Fig. S38 NOESY spectrum of compound 4.....                                                               | 31 |
| Fig. S39 UV spectrum of compound 4.....                                                                  | 32 |
| Fig. S40 IR spectrum of compound 4.....                                                                  | 32 |
| Fig. S41 HR-ESI-MS spectrum of compound 5.....                                                           | 33 |
| Fig. S42 <sup>1</sup> H NMR (400 MHz, CDCl <sub>3</sub> ) spectrum of compound 5.....                    | 33 |
| Fig. S43 <sup>13</sup> C NMR (100 MHz, CDCl <sub>3</sub> ) spectrum of compound 5.....                   | 34 |
| Fig. S44 DEPT (100 MHz, CDCl <sub>3</sub> ) and <sup>13</sup> C NMR spectra of compound 5.....           | 35 |
| Fig. S45 HSQC spectrum of compound 5.....                                                                | 35 |
| Fig. S46 HMBC spectrum of compound 5.....                                                                | 36 |
| Fig. S47 <sup>1</sup> H- <sup>1</sup> H COSY spectrum of compound 5.....                                 | 36 |
| Fig. S48 NOESY spectrum of compound 5.....                                                               | 37 |
| Fig. S49 UV spectrum of compound 5.....                                                                  | 38 |
| Fig. S50 IR spectrum of compound 5.....                                                                  | 38 |
| Fig. S51 HR-ESI-MS spectrum of compound 6.....                                                           | 38 |
| Fig. S52 <sup>1</sup> H NMR (400 MHz, CDCl <sub>3</sub> ) spectrum of compound 6.....                    | 39 |

|                                                                                                  |    |
|--------------------------------------------------------------------------------------------------|----|
| Fig. S53 <sup>13</sup> C NMR (100 MHz, CDCl <sub>3</sub> ) spectrum of compound 6 .....          | 39 |
| Fig. S54 DEPT (100 MHz, CDCl <sub>3</sub> ) and <sup>13</sup> C NMR spectra of compound 6.....   | 40 |
| Fig. S55 HSQC spectrum of compound 6 .....                                                       | 40 |
| Fig. S56 HMBC spectrum of compound 6 .....                                                       | 41 |
| Fig. S57 <sup>1</sup> H- <sup>1</sup> H COSY spectrum of compound 6 .....                        | 42 |
| Fig. S58 NOESY spectrum of compound 6 .....                                                      | 43 |
| Fig. S59 UV spectrum of compound 6.....                                                          | 44 |
| Fig. S60 IR spectrum of compound 6 .....                                                         | 44 |
| Fig. S61 HR-ESI-MS spectrum of compound 23.....                                                  | 44 |
| Fig. S62 <sup>1</sup> H NMR (600 MHz, CDCl <sub>3</sub> ) spectrum of compound 23 .....          | 45 |
| Fig. S63 <sup>13</sup> C NMR (150 MHz, CDCl <sub>3</sub> ) spectrum of compound 23 .....         | 45 |
| Fig. S64 DEPT (150 MHz, CDCl <sub>3</sub> ) and <sup>13</sup> C NMR spectra of compound 23.....  | 46 |
| Fig. S65 HSQC spectrum of compound 23 .....                                                      | 46 |
| Fig. S66 HMBC spectrum of compound 23 .....                                                      | 47 |
| Fig. S67 <sup>1</sup> H- <sup>1</sup> H COSY spectrum of compound 23 .....                       | 48 |
| Fig. S68 UV spectrum of compound 23.....                                                         | 49 |
| Fig. S69 IR spectrum of compound 23 .....                                                        | 49 |
| Fig. S70 HR-ESI-MS spectrum of compound 24.....                                                  | 49 |
| Fig. S71 <sup>1</sup> H NMR (600 MHz, CDCl <sub>3</sub> ) spectrum of compound 24 .....          | 50 |
| Fig. S72 <sup>13</sup> C NMR (150 MHz, CDCl <sub>3</sub> ) spectrum of compound 24 .....         | 50 |
| Fig. S73 HSQC spectrum of compound 24 .....                                                      | 51 |
| Fig. S74 HMBC spectrum of compound 24 .....                                                      | 52 |
| Fig. S75 <sup>1</sup> H- <sup>1</sup> H COSY spectrum of compound 24 .....                       | 52 |
| Fig. S76 NOESY spectrum of compound 24 .....                                                     | 53 |
| Fig. S77 UV spectrum of compound 24.....                                                         | 53 |
| Fig. S78 IR spectrum of compound 24 .....                                                        | 53 |
| Fig. S79 HR-ESI-MS spectrum of compound 25.....                                                  | 54 |
| Fig. S80 <sup>1</sup> H NMR (600 MHz, CDCl <sub>3</sub> ) spectrum of compound 25 .....          | 55 |
| Fig. S81 <sup>13</sup> C NMR (150 MHz, CDCl <sub>3</sub> ) spectrum of compound 25 .....         | 55 |
| Fig. S82 DEPT (150 MHz, CDCl <sub>3</sub> ) and <sup>13</sup> C NMR spectra of compound 25.....  | 56 |
| Fig. S83 HSQC spectrum of compound 25 .....                                                      | 56 |
| Fig. S84 HMBC spectrum of compound 25 .....                                                      | 57 |
| Fig. S85 <sup>1</sup> H- <sup>1</sup> H COSY spectrum of compound 25 .....                       | 57 |
| Fig. S86 UV spectrum of compound 25.....                                                         | 58 |
| Fig. S87 IR spectrum of compound 25 .....                                                        | 58 |
| Fig. S88 HR-ESI-MS spectrum of compound 27.....                                                  | 58 |
| Fig. S89 <sup>1</sup> H NMR (600 MHz, CDCl <sub>3</sub> ) spectrum of compound 27 .....          | 59 |
| Fig. S90 <sup>13</sup> C NMR (150 MHz, CDCl <sub>3</sub> ) spectrum of compound 27 .....         | 59 |
| Fig. S91 DEPT (150 MHz, CDCl <sub>3</sub> ) and <sup>13</sup> C NMR spectra of compound 27.....  | 60 |
| Fig. S92 HSQC spectrum of compound 27 .....                                                      | 60 |
| Fig. S93 HMBC spectrum of compound 27 .....                                                      | 61 |
| Fig. S94 <sup>1</sup> H- <sup>1</sup> H COSY spectrum of compound 27 .....                       | 61 |
| Fig. S95 UV spectrum of compound 27.....                                                         | 62 |
| Fig. S96 IR spectrum of compound 27 .....                                                        | 63 |
| Fig. S97 HR-ESI-MS spectrum of compound 28.....                                                  | 63 |
| Fig. S98 <sup>1</sup> H NMR (600 MHz, CDCl <sub>3</sub> ) spectrum of compound 28 .....          | 64 |
| Fig. S99 <sup>13</sup> C NMR (150 MHz, CDCl <sub>3</sub> ) spectrum of compound 28 .....         | 64 |
| Fig. S100 DEPT (150 MHz, CDCl <sub>3</sub> ) and <sup>13</sup> C NMR spectra of compound 28..... | 65 |
| Fig. S101 HSQC spectrum of compound 28 .....                                                     | 65 |
| Fig. S102 HMBC spectrum of compound 28 .....                                                     | 66 |
| Fig. S103 <sup>1</sup> H- <sup>1</sup> H COSY spectrum of compound 28 .....                      | 66 |
| Fig. S104 NOESY spectrum of compound 28 .....                                                    | 67 |
| Fig. S105 UV spectrum of compound 28.....                                                        | 68 |
| Fig. S106 IR spectrum of compound 28 .....                                                       | 68 |
| Fig. S107 HR-ESI-MS spectrum of compound 29.....                                                 | 68 |

|                                                                                                                                                                                |    |
|--------------------------------------------------------------------------------------------------------------------------------------------------------------------------------|----|
| Fig. S108 <sup>1</sup> H NMR (600 MHz, CDCl <sub>3</sub> ) spectrum of compound 29.....                                                                                        | 69 |
| Fig. S109 <sup>13</sup> C NMR (150 MHz, CDCl <sub>3</sub> ) spectrum of compound 29 .....                                                                                      | 69 |
| Fig. S110 DEPT (150 MHz, CDCl <sub>3</sub> ) and <sup>13</sup> C NMR spectra of compound 29 .....                                                                              | 70 |
| Fig. S111 HSQC spectrum of compound 29.....                                                                                                                                    | 70 |
| Fig. S112 HMBC spectrum of compound 29 .....                                                                                                                                   | 71 |
| Fig. S113 <sup>1</sup> H- <sup>1</sup> H COSY spectrum of compound 29.....                                                                                                     | 72 |
| Fig. S114 NOESY spectrum of compound 29.....                                                                                                                                   | 73 |
| Fig. S115 UV spectrum of compound 29 .....                                                                                                                                     | 74 |
| Fig. S116 IR spectrum of compound 29.....                                                                                                                                      | 74 |
| Fig. S117 Linear correlation plots of calculated and experimental IC values of two plausible epimers 1A and 1B.....                                                            | 75 |
| Table S1. Experimental and Calculated <sup>13</sup> C NMR Chemical Shifts of 1A and 1B .....                                                                                   | 75 |
| Fig. S118 Rh <sub>2</sub> (OCOFCF <sub>3</sub> ) <sub>4</sub> -induced CD spectra of (4 <i>R</i> ,5 <i>S</i> ,7 <i>S</i> ,9 <i>R</i> )-eremophila-1(10),11-dien-9-ol (4) ..... | 76 |
| Fig. S119 CD spectra of <i>in situ</i> formed Mo-complexes of 6 recorded in DMSO after 0.5 h from dissolving in the 1:1 ligand-to-metal ratio.....                             | 76 |
| Table S2. Primers for qPCR.....                                                                                                                                                | 77 |
| Fig. S122 Effects of different concentrations of compounds (IC <sub>50</sub> ) alone on cell viability .....                                                                   | 77 |
| Fig. S123 NO inhibition of all the isolated compounds at 50 μM was examined. ....                                                                                              | 78 |

## S1. Physical constants and spectral data of 1-6, 23-24, 26-29

alpinoxyphllaone C (**1**): yellow oil;  $[\alpha]_D^{27} +18.8$  (0.5, CHCl<sub>3</sub>); HR-ESI-MS (positive)  $m/z$  237.1855 [M + H]<sup>+</sup> (calcd for C<sub>15</sub>H<sub>25</sub>O<sub>2</sub><sup>+</sup>, 237.1855); UV (MeOH)  $\lambda_{\max}$  (log  $\epsilon$ ): 201 (3.26) nm; IR (KBr)  $\nu_{\max}$  3438, 2934, 1716, 1643, 1401, 1385, 1073, 890 cm<sup>-1</sup>; <sup>1</sup>H and <sup>13</sup>C-NMR spectroscopic data, see **Table 1**.

(3*S*,4*S*,5*R*,7*R*)-eremophila-3,4-epoxy-1(10),11-dien-2-one (**2**): colorless crystals;  $[\alpha]_D^{27} -124.1$  (0.5, CHCl<sub>3</sub>); HR-ESI-MS (positive)  $m/z$  233.1540 [M + H]<sup>+</sup> (calcd for C<sub>15</sub>H<sub>21</sub>O<sub>2</sub><sup>+</sup>, 233.1542); UV (MeOH)  $\lambda_{\max}$  (log  $\epsilon$ ): 245 (3.69) nm; IR (KBr)  $\nu_{\max}$  2961, 2931, 1671, 1641, 1626, 1451, 1401, 1384, 1314, 1107, 905, 875, 828, 664, 547, 481 cm<sup>-1</sup>; <sup>1</sup>H and <sup>13</sup>C-NMR spectroscopic data, see **Table 1**.

**Crystal Data** for **2**. C<sub>15</sub>H<sub>20</sub>O<sub>2</sub> ( $M = 232.31$  g/mol): orthorhombic, space group P2<sub>1</sub>2<sub>1</sub>2<sub>1</sub> (no. 19),  $a = 9.12559(16)$  Å,  $b = 9.43073(17)$  Å,  $c = 14.8426(3)$  Å,  $V = 1277.37(4)$  Å<sup>3</sup>,  $Z = 4$ ,  $T = 170.0(2)$  K,  $\mu(\text{CuK}\alpha) = 0.617$  mm<sup>-1</sup>,  $D_{\text{calc}} = 1.208$  g/cm<sup>3</sup>, 10537 reflections measured ( $11.116^\circ \leq 2\theta \leq 147.726^\circ$ ), 2556 unique ( $R_{\text{int}} = 0.0442$ ,  $R_{\text{sigma}} = 0.0279$ ) which were used in all calculations. The final  $R_1 = 0.0323$  ( $I > 2\sigma(I)$ ),  $wR_2 = 0.0872$  (all data), CCDC number: 2217170.

(3*R*,4*R*,5*R*,7*R*)-eremophila-3,4-epoxy-1(10),11-dien-2-one (**3**): colorless oil;  $[\alpha]_D^{27} +105.8$  (0.5, CHCl<sub>3</sub>); HR-ESI-MS (positive)  $m/z$  233.1540 [M + H]<sup>+</sup> (calcd for C<sub>15</sub>H<sub>21</sub>O<sub>2</sub><sup>+</sup>, 233.1542); UV (MeOH)  $\lambda_{\max}$  (log  $\epsilon$ ): 202 (3.69), 242 (3.71) nm; IR (KBr)  $\nu_{\max}$  2935, 1673, 1437, 1400, 1385, 1302, 1206, 1073, 890, 538 cm<sup>-1</sup>; <sup>1</sup>H and <sup>13</sup>C-NMR spectroscopic data, see **Table 1**.

(4*R*,5*S*,7*S*,9*R*)-eremophila-1(10),11-dien-9-ol (**4**): colorless oil;  $[\alpha]_D^{27} +53.0$  (0.5, CHCl<sub>3</sub>); HR-ESI-MS (positive)  $m/z$  203.1810 [M + H - H<sub>2</sub>O]<sup>+</sup> (calcd for C<sub>15</sub>H<sub>23</sub><sup>+</sup>, 203.1800); UV (MeOH)  $\lambda_{\max}$  (log  $\epsilon$ ): 203 (3.52) nm; IR (KBr)  $\nu_{\max}$  3424, 2927, 2363, 1642, 1441, 1400, 1384, 1051, 887, 472 cm<sup>-1</sup>; <sup>1</sup>H and <sup>13</sup>C-NMR spectroscopic data, see **Table 1**.

(2*R*,4*R*,5*S*,7*S*,9*R*)-eremophila-1(10),11-dien-2,9-diol (**5**): colorless crystals;  $[\alpha]_D^{21} +115.2$  (0.5, CHCl<sub>3</sub>); HR-ESI-MS (positive)  $m/z$  237.1859 [M + H]<sup>+</sup> (calcd for C<sub>15</sub>H<sub>25</sub>O<sub>2</sub><sup>+</sup>, 237.1855); UV (MeOH)

$\lambda_{\max}$  nm (log  $\epsilon$ ): 204 (2.46), 234 (1.45); IR (KBr)  $\nu_{\max}$  3323, 2928, 1647, 1441, 1375, 1284, 1052, 1007, 885, 682  $\text{cm}^{-1}$ ;  $^1\text{H}$  and  $^{13}\text{C}$ -NMR spectroscopic data, see **Table 1**.

**Crystal Data** for **5**.  $\text{C}_{15}\text{H}_{24}\text{O}_2$  ( $M = 236.34$  g/mol): orthorhombic, space group  $\text{P}2_12_12_1$  (no. 19),  $a = 8.155(1)$  Å,  $b = 20.429(2)$  Å,  $c = 27.192(3)$  Å,  $V = 4530.3(7)$  Å<sup>3</sup>,  $Z = 4$ ,  $T = 149.99(10)$  K,  $\mu(\text{Cu K}\alpha) = 1.54184$   $\text{mm}^{-1}$ ,  $D_{\text{calc}} = 1.087$   $\text{g/cm}^3$ , 12357 reflections measured ( $5.41^\circ \leq 2\Theta \leq 147.374^\circ$ ), 7861 unique ( $R_{\text{int}} = 0.0727$ ,  $R_{\text{sigma}} = 0.1223$ ) which were used in all calculations. The final  $R_1 = 0.0731$  ( $I > 2\sigma(I)$ ) and  $wR_2 = 0.1626$  (all data), CCDC number: 2221275.

**Table S1 Hydrogen Bond Interactions in Compound 5**

| D-H     | d (D-H)  | d (H..A) | <DHA    | d (D..A) | A                           |
|---------|----------|----------|---------|----------|-----------------------------|
| O1C-H1C | 0.99(8)  | 1.74(8)  | 174(9)  | 2.732(5) | O2C [ x-1, y, z ]           |
| O1A-H1A | 0.97(5)  | 1.75(5)  | 174(10) | 2.711(5) | O2A [ x-1, y, z ]           |
| O2A-H2A | 0.91(10) | 1.87(11) | 152(10) | 2.706(6) | O1B                         |
| O2C-H2C | 0.91(10) | 1.89(10) | 174(11) | 2.799(6) | O2B [ -x+2, y+1/2, -z+3/2 ] |
| O1B-H1B | 1.03(12) | 1.71(13) | 171(11) | 2.727(6) | O1C                         |
| O2B-H2B | 1.04(11) | 1.70(11) | 176(10) | 2.735(7) | O1M [ -x+1, y-1/2, -z+3/2 ] |
| O1M-H1M | 0.96(6)  | 1.75(5)  | 161(11) | 2.676(7) | O1A                         |

(1*R*,2*R*,4*R*,5*S*,7*R*)-eremophila-9,11-dien-1,2-diol (**6**): yellow amorphous solid;  $[\alpha]_{\text{D}}^{26} -46.4$  (0.5,  $\text{CHCl}_3$ ); HR-ESI-MS (positive)  $m/z$  259.1677  $[\text{M} + \text{Na}]^+$  (calcd for  $\text{C}_{15}\text{H}_{24}\text{O}_2\text{Na}^+$ , 259.1674); UV (MeOH)  $\lambda_{\max}$  nm (log  $\epsilon$ ): 204 (3.01); IR (KBr)  $\nu_{\max}$  3339, 2962, 2925, 1639, 1447, 1374, 1071, 1006, 889  $\text{cm}^{-1}$ ;  $^1\text{H}$  and  $^{13}\text{C}$ -NMR spectroscopic data, see **Table 1**.

oxyphyllone J (**23**): yellow oil;  $[\alpha]_{\text{D}}^{27} +16.8$  (0.5,  $\text{CHCl}_3$ ). HR-ESI-MS (positive)  $m/z$  235.1338  $[\text{M}+\text{H}]^+$  (calcd for  $\text{C}_{14}\text{H}_{19}\text{O}_3$ , 235.1334); UV (MeOH)  $\lambda_{\max}$  (log  $\epsilon$ ): 208 (4.08), 237 (3.90), 274 (3.90) nm; IR (KBr)  $\nu_{\max}$  2961, 2872, 1636, 1470, 1385, 1354, 1259, 1218, 1185, 1124, 1058, 1008, 938, 907, 872, 846, 810, 616, 549  $\text{cm}^{-1}$ ;  $^1\text{H}$  and  $^{13}\text{C}$ -NMR spectroscopic data, see **Table 2**.

oxyphyllone H (**24**): yellow oil;  $[\alpha]_{\text{D}}^{30} +197.5$  (0.5,  $\text{CHCl}_3$ ); HR-ESI-MS (positive)  $m/z$  237.1499  $[\text{M}+\text{H}]^+$  (calcd for  $\text{C}_{14}\text{H}_{21}\text{O}_3^+$ , 237.1491); UV (MeOH)  $\lambda_{\max}$  nm (log  $\epsilon$ ): 202 (3.64), 265 (4.07); IR

(KBr)  $\nu_{\max}$  3498, 2963, 2872, 1680, 1457, 1372, 1158, 979, 856 $\text{cm}^{-1}$ ;  $^1\text{H}$  and  $^{13}\text{C}$ -NMR spectroscopic data, see **Table 2**.

oxyphyllone K (**26**): yellow oil; HR-ESI-MS (positive)  $m/z$  237.0883  $[\text{M}+\text{Na}]^+$  (calcd for  $\text{C}_{14}\text{H}_{14}\text{O}_2\text{Na}$ , 237.0891); UV (MeOH)  $\lambda_{\max}$  (log  $\epsilon$ ): 207 (4.33), 230 (4.12), 256 (4.23) nm; IR (KBr)  $\nu_{\max}$  3438, 2967, 2929, 1694, 1655, 1605, 1590, 1560, 1465, 1400, 1384, 1286, 1255, 1082, 880, 799, 519  $\text{cm}^{-1}$ ;  $^1\text{H}$  and  $^{13}\text{C}$ -NMR spectroscopic data, see **Table 2**.

oxyphyllone I (**27**): brown gelatinous;  $[\alpha]_{\text{D}}^{26}$  -8.2 (0.5,  $\text{CHCl}_3$ ); HR-ESI-MS (positive)  $m/z$  233.1540  $[\text{M}+\text{H}]^+$  (calcd for  $\text{C}_{15}\text{H}_{21}\text{O}_2^+$ , 233.1542); UV (MeOH)  $\lambda_{\max}$  nm (log  $\epsilon$ ): 208 (4.04), 260 (3.84); IR (KBr)  $\nu_{\max}$  2930, 1676, 1606, 1450, 1386, 1283, 1053, 824 $\text{cm}^{-1}$ ;  $^1\text{H}$  and  $^{13}\text{C}$ -NMR spectroscopic data, see **Table 2**.

oxyspirone A (**28**): light yellow colloid;  $[\alpha]_{\text{D}}^{25}$  -12.0 (0.35,  $\text{CHCl}_3$ ); HR-ESI-MS (positive)  $m/z$  259.1660  $[\text{M}+\text{Na}]^+$  (calcd for  $\text{C}_{15}\text{H}_{24}\text{O}_2\text{Na}^+$ , 259.1674); UV (MeOH)  $\lambda_{\max}$  nm (log  $\epsilon$ ): 203 (2.14), 237 (2.24); IR (KBr)  $\nu_{\max}$  3436, 2928, 2862, 1699, 1456, 1381, 1041 $\text{cm}^{-1}$ ;  $^1\text{H}$  and  $^{13}\text{C}$ -NMR spectroscopic data, see **Table 2**.

oxyspirone B (**29**): light yellow oil;  $[\alpha]_{\text{D}}^{25}$  +6.5 (0.7,  $\text{CHCl}_3$ ); HR-ESI-MS (positive)  $m/z$  261.1790  $[\text{M}+\text{Na}]^+$  (calcd for  $\text{C}_{15}\text{H}_{26}\text{O}_2\text{Na}^+$ , 261.1831); UV (MeOH)  $\lambda_{\max}$  nm (log  $\epsilon$ ): 204 (3.39); IR (KBr)  $\nu_{\max}$  3470, 2943, 2873, 1641, 1455, 1377, 1055, 887, 541 $\text{cm}^{-1}$ ;  $^1\text{H}$  and  $^{13}\text{C}$ -NMR spectroscopic data, see **Table 2**.

## S2. Selected spectra for compounds 1-6, 23-24, 26-29

### Elemental Composition Report

Page 1

#### Single Mass Analysis

Tolerance = 5.0 mDa / DBE: min = -1.5, max = 50.0

Element prediction: Off

Number of isotope peaks used for i-FIT = 3

Monoisotopic Mass, Even Electron Ions

36 formula(e) evaluated with 1 results within limits (up to 50 best isotopic matches for each mass)

Elements Used:

C: 0-100 H: 0-200 O: 0-200

A04G56G6A

20211011022 201 (1.627)

1: TOF MS ES+  
1.05e+005

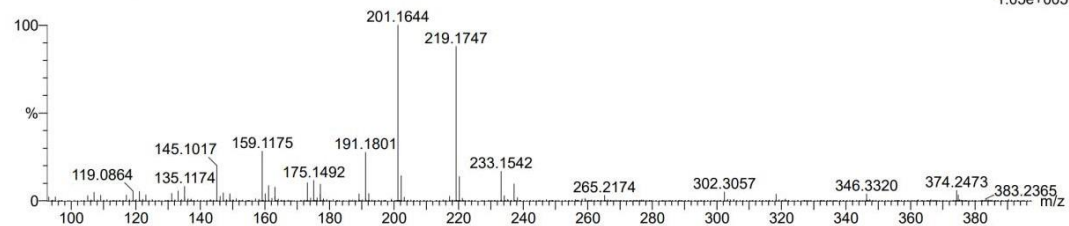

Minimum: -1.5  
Maximum: 50.0

| Mass     | Calc. Mass | mDa | PPM | DBE | i-FIT | Norm | Conf (%) | Formula    |
|----------|------------|-----|-----|-----|-------|------|----------|------------|
| 237.1855 | 237.1855   | 0.0 | 0.0 | 3.5 | 101.0 | n/a  | n/a      | C15 H25 O2 |

Fig. S1 HR-ESI-MS spectrum of compound 1

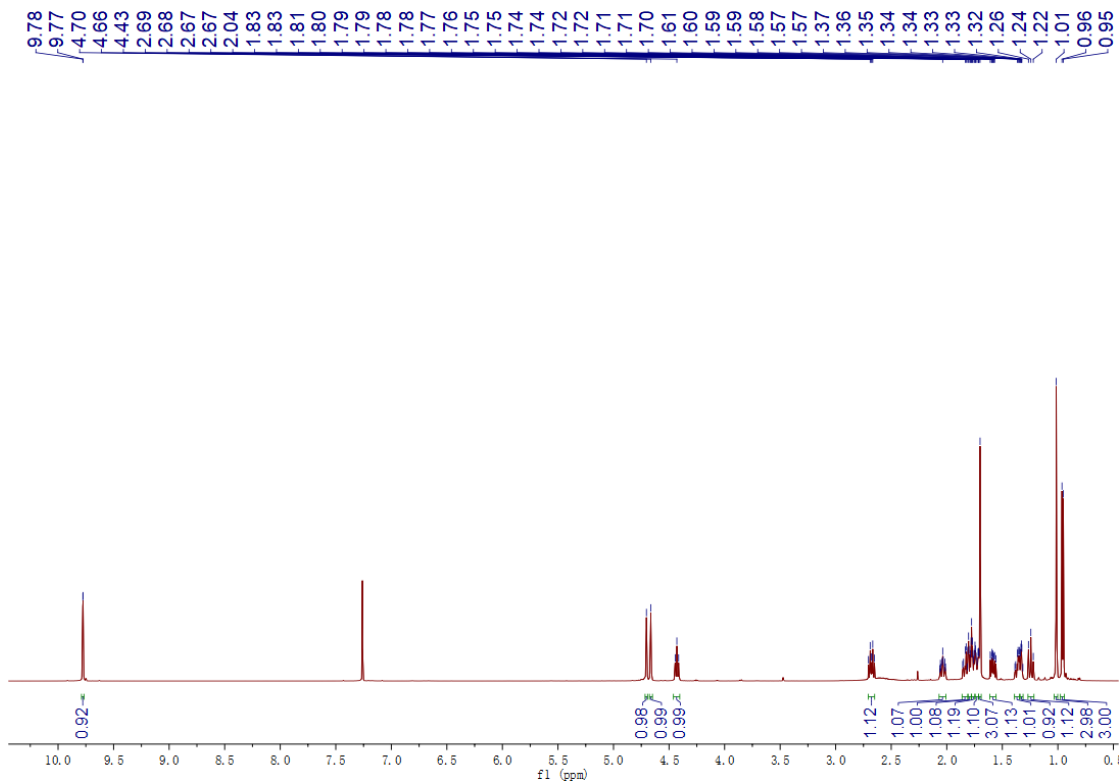

Fig. S2  $^1\text{H}$  NMR (600 MHz,  $\text{CDCl}_3$ ) spectrum of compound 1



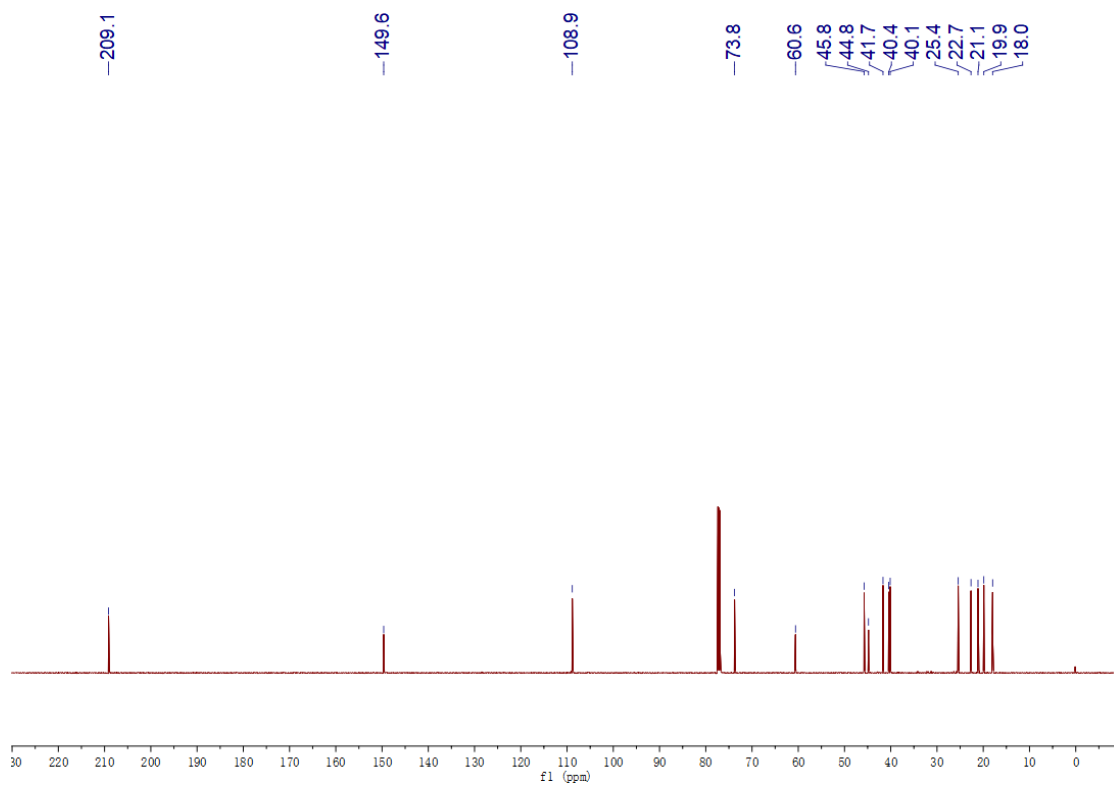

**Fig. S3  $^{13}\text{C}$  NMR (150 MHz,  $\text{CDCl}_3$ ) spectrum of compound 1**

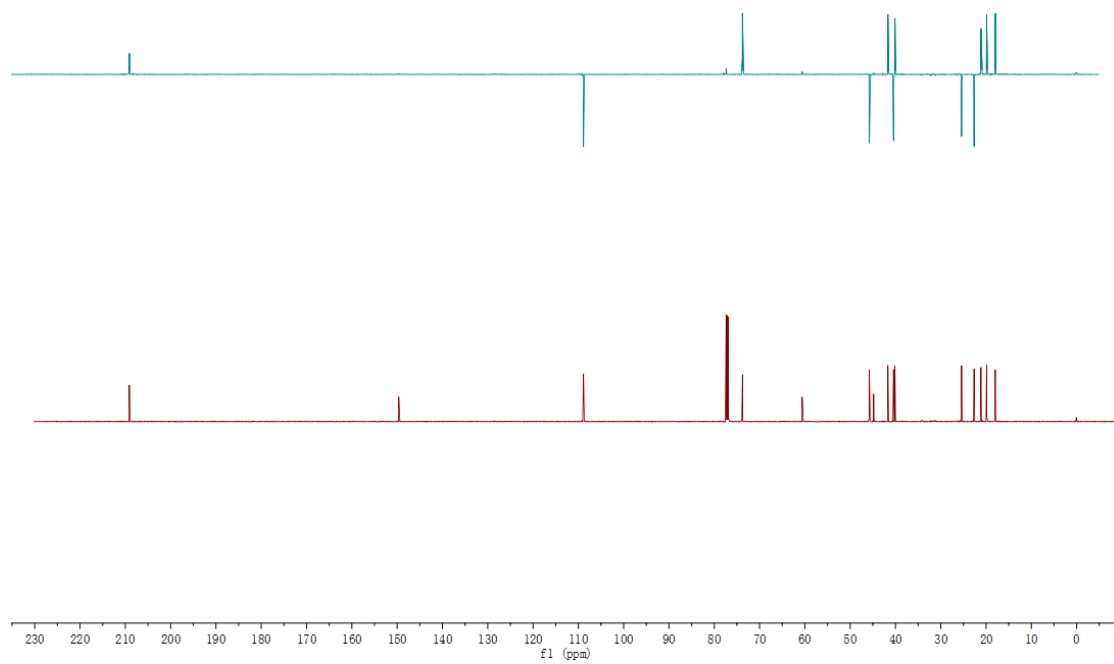

**Fig. S4 DEPT (150 MHz,  $\text{CDCl}_3$ ) and  $^{13}\text{C}$  NMR spectra of compound 1**

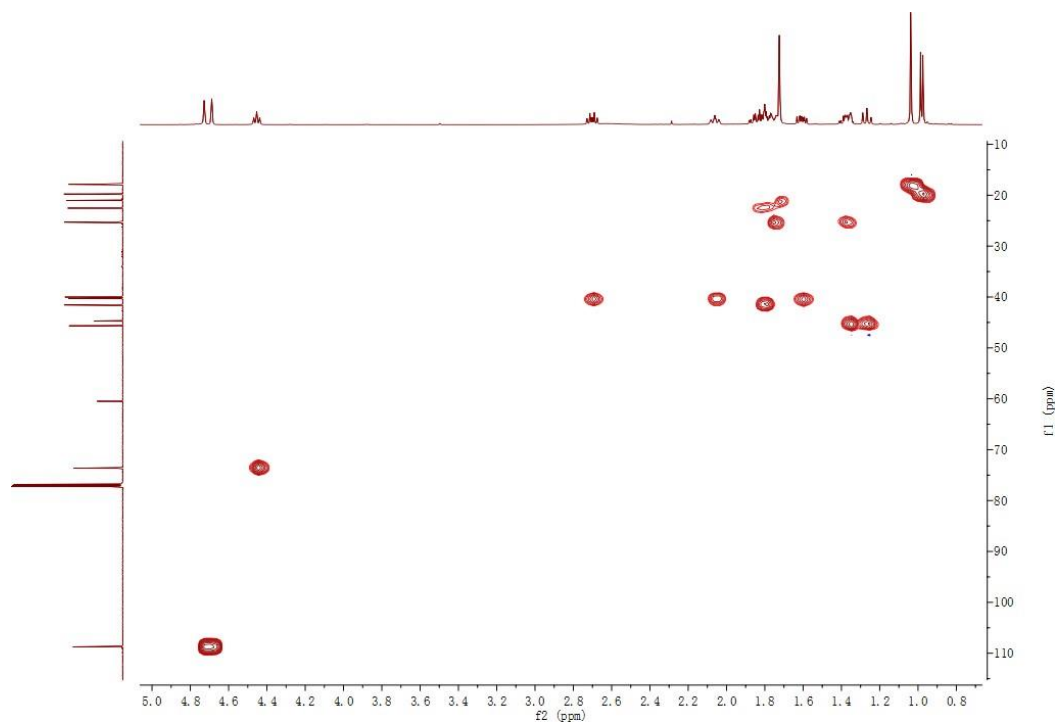

**Fig. S5 HSQC spectrum of compound 1**

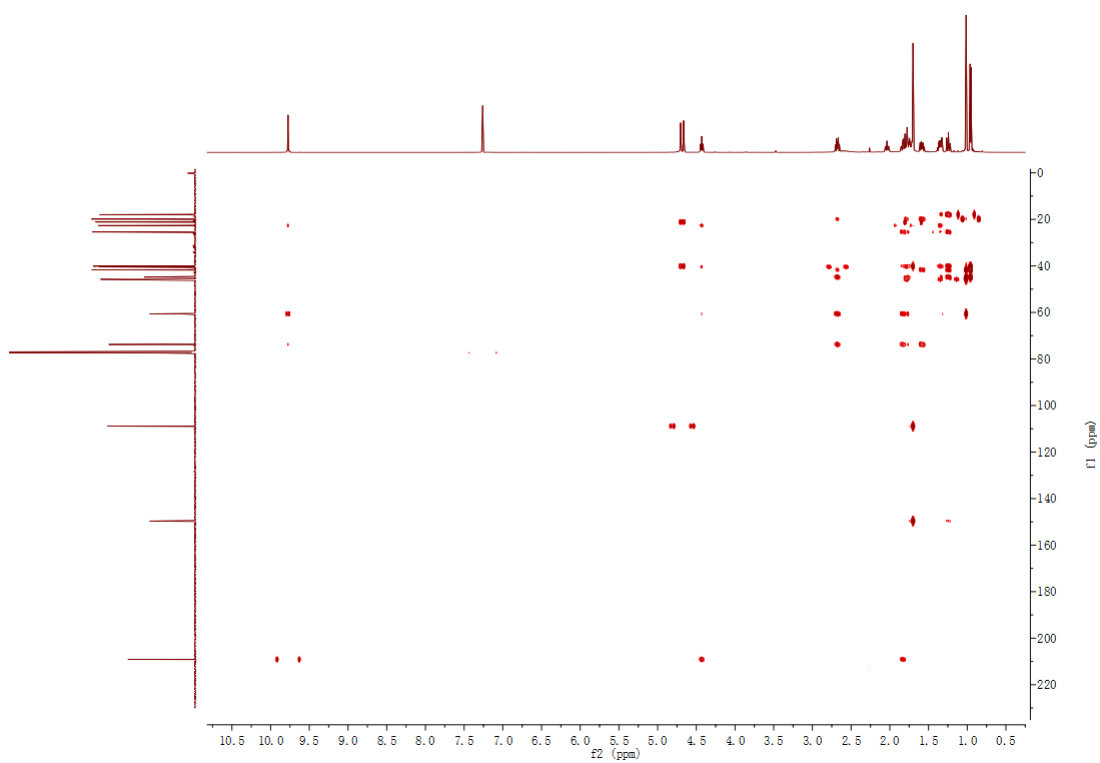

**Fig. S6 HMBC spectrum of compound 1**

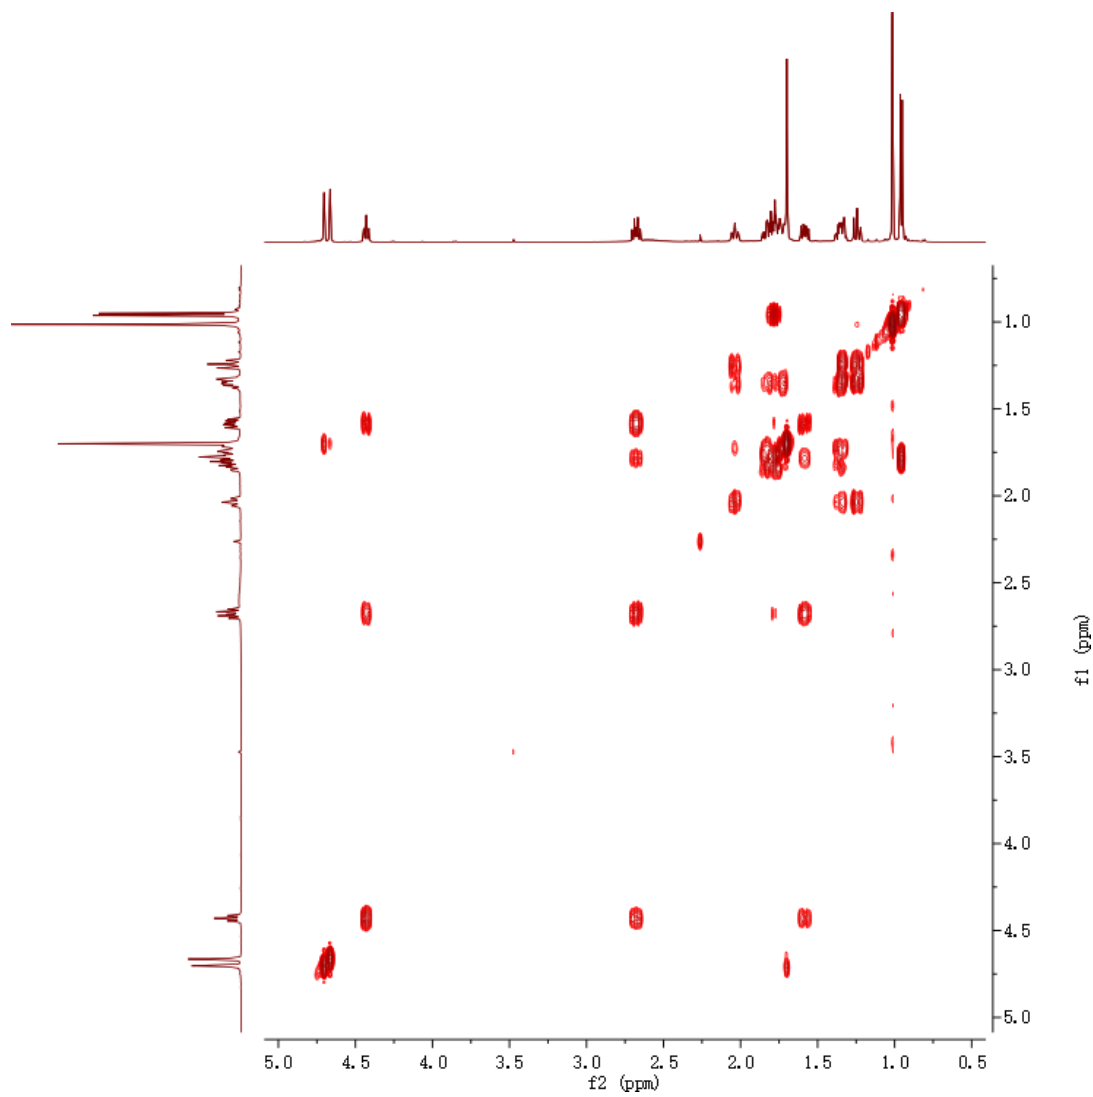

**Fig. S7  $^1\text{H}$ - $^1\text{H}$  COSY spectrum of compound 1**

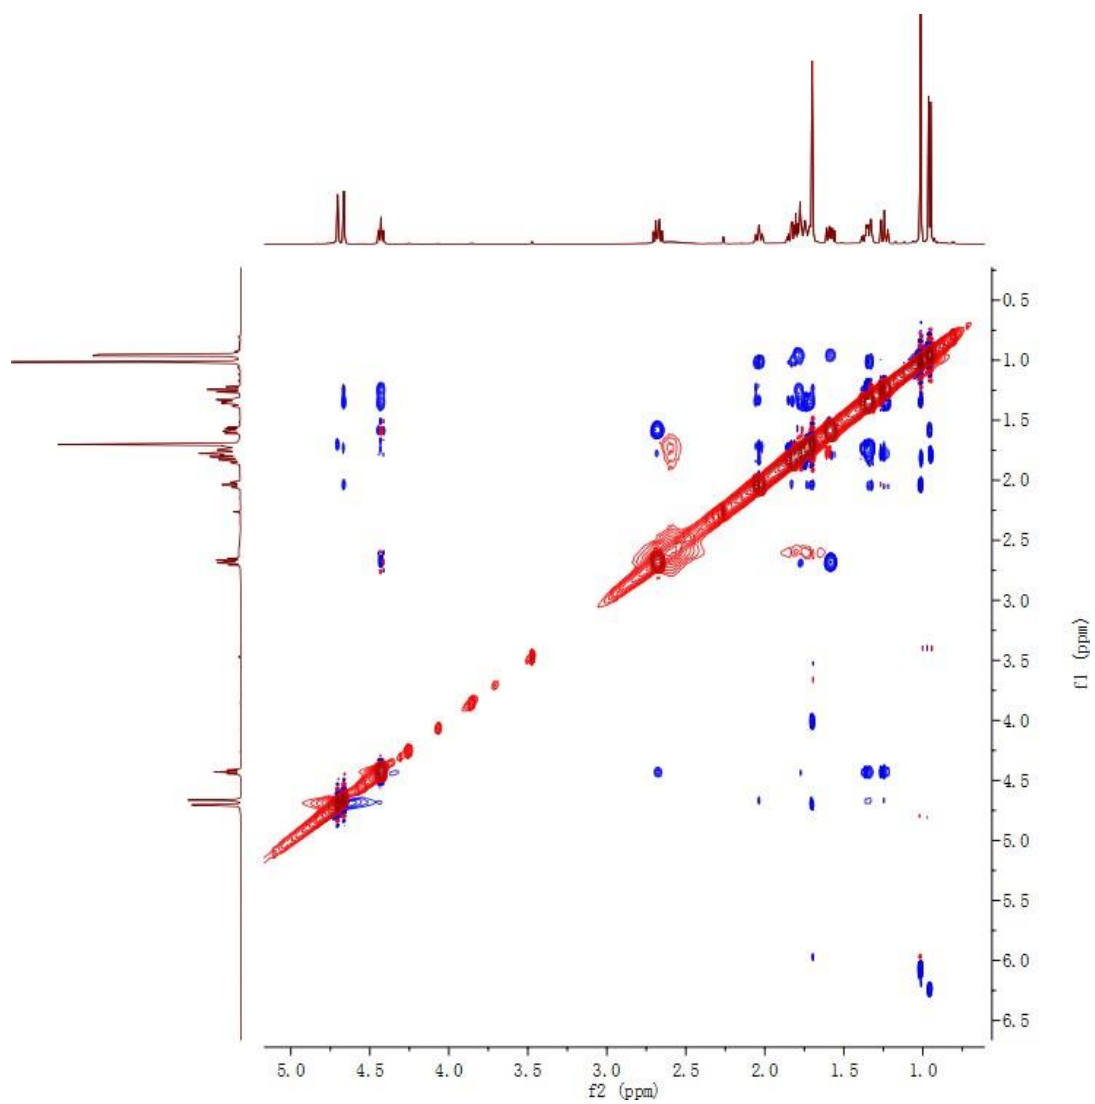

**Fig. S8 NOESY spectrum of compound 1**

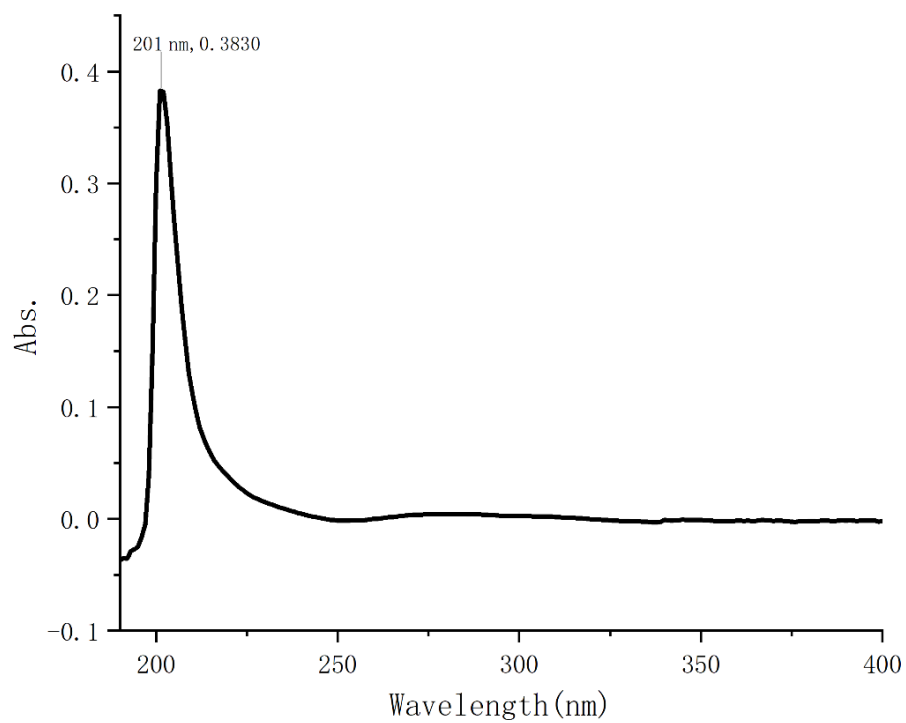

**Fig. S9 UV spectrum of compound 1**

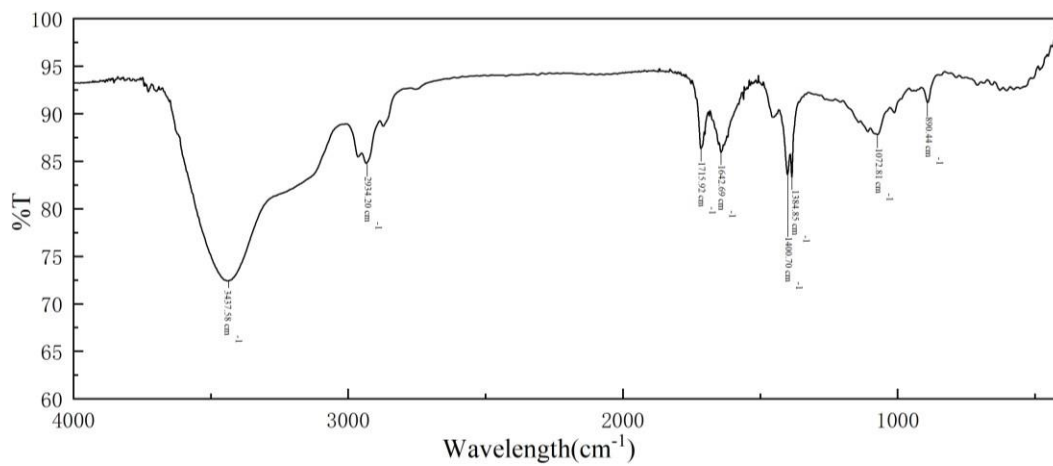

**Fig. S10 IR spectrum of compound 1**

## Single Mass Analysis

Tolerance = 5.0 mDa / DBE: min = -1.5, max = 50.0

Element prediction: Off

Number of isotope peaks used for i-FIT = 3

Monoisotopic Mass, Even Electron Ions

36 formula(e) evaluated with 1 results within limits (up to 50 best isotopic matches for each mass)

Elements Used:

C: 0-100 H: 0-200 O: 0-200

A04E412

20220111-24 202 (1.634)

1: TOF MS ES+  
7.46e+004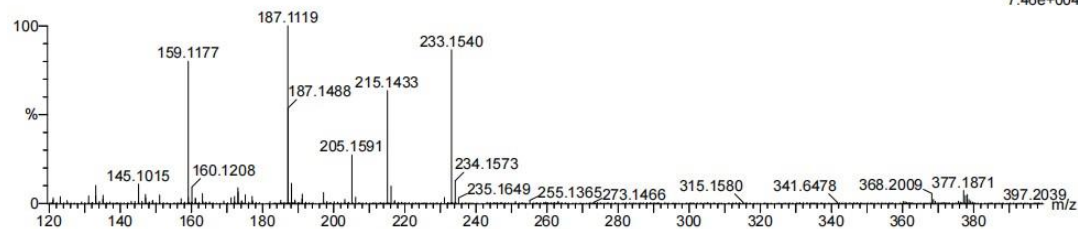

Minimum: -1.5  
Maximum: 5.0 10.0 50.0

| Mass     | Calc. Mass | mDa  | PPM  | DBE | i-FIT | Norm | Conf (%) | Formula    |
|----------|------------|------|------|-----|-------|------|----------|------------|
| 233.1540 | 233.1542   | -0.2 | -0.9 | 5.5 | 199.3 | n/a  | n/a      | C15 H21 O2 |

Fig. S11 HR-ESI-MS spectrum of compound 2

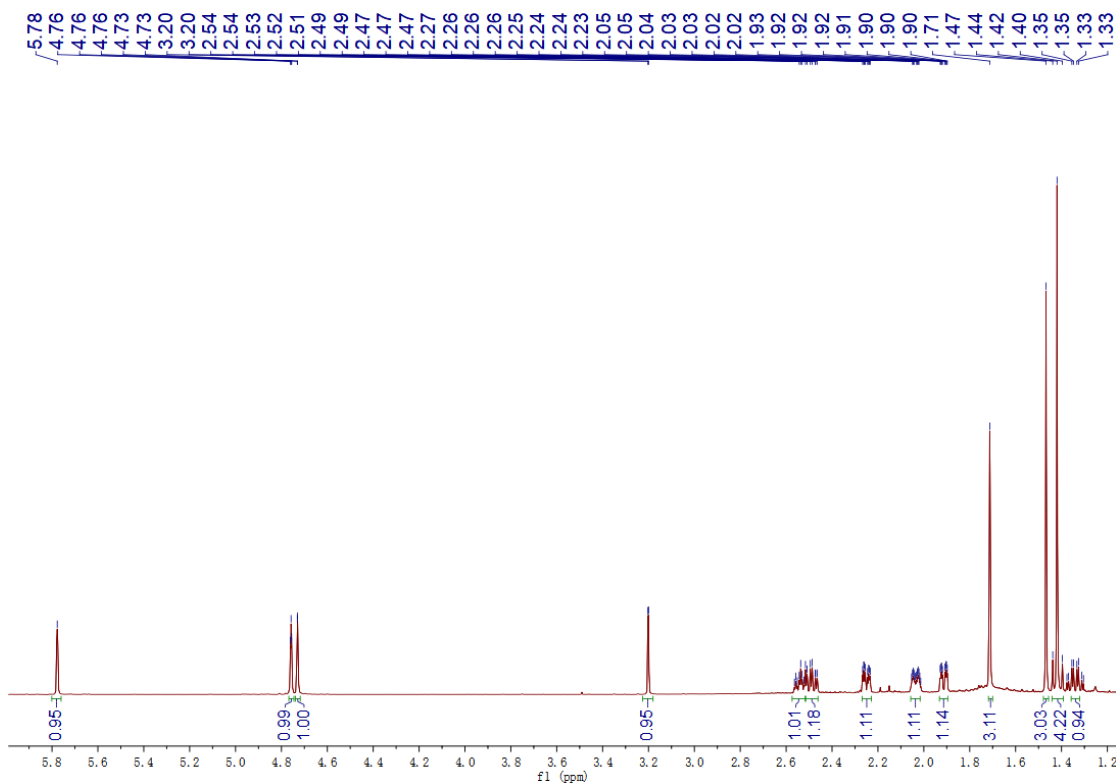Fig. S12  $^1\text{H}$  NMR (600 MHz,  $\text{CDCl}_3$ ) spectrum of compound 2

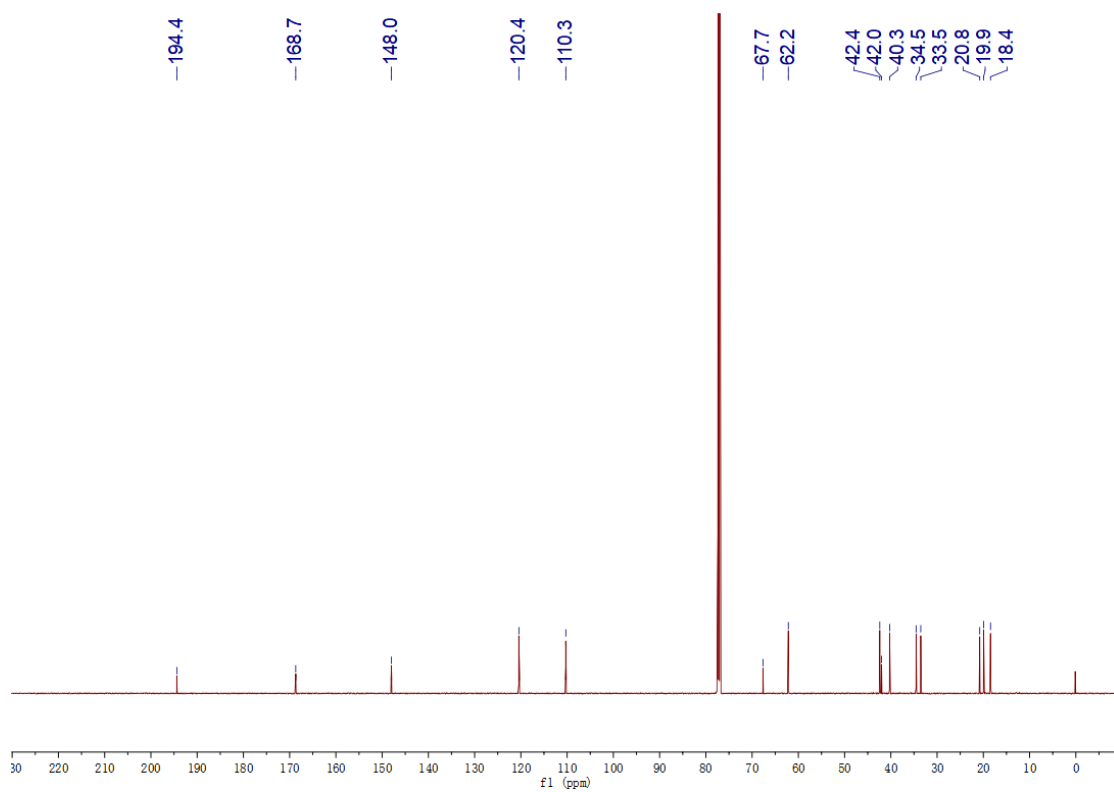

**Fig. S13** <sup>13</sup>C NMR (150 MHz, CDCl<sub>3</sub>) spectrum of compound 2

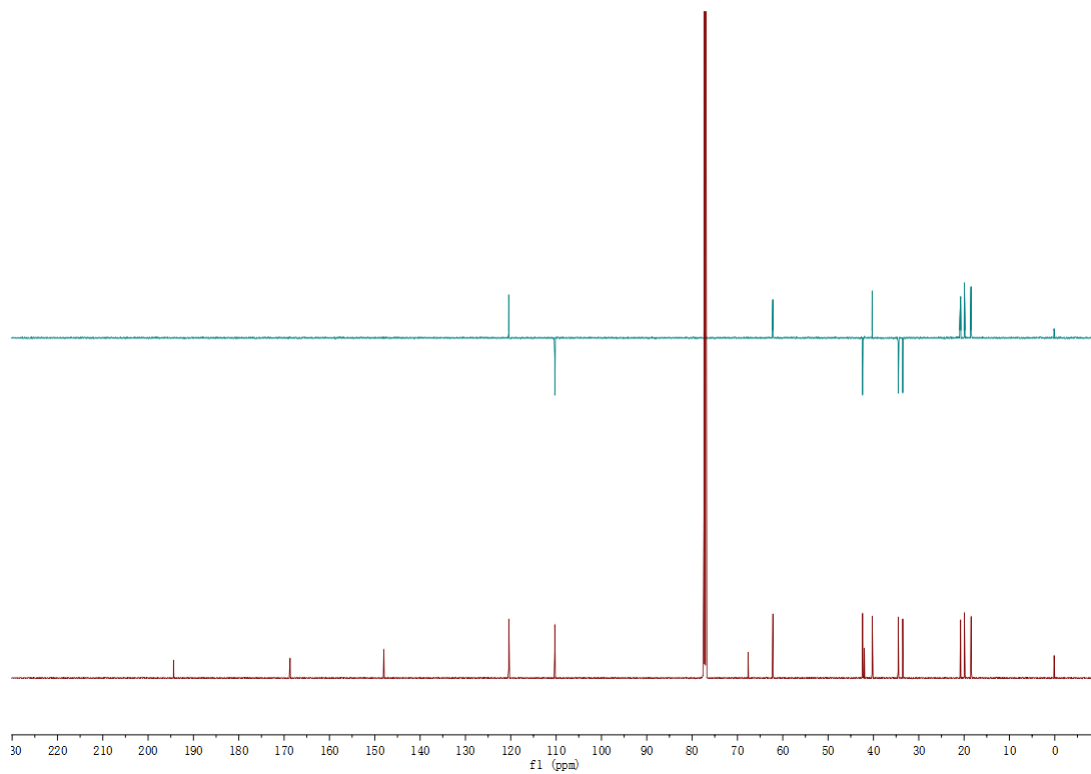

**Fig. S14 DEPT (150 MHz, CDCl<sub>3</sub>) and <sup>13</sup>C NMR spectra of compound 2**

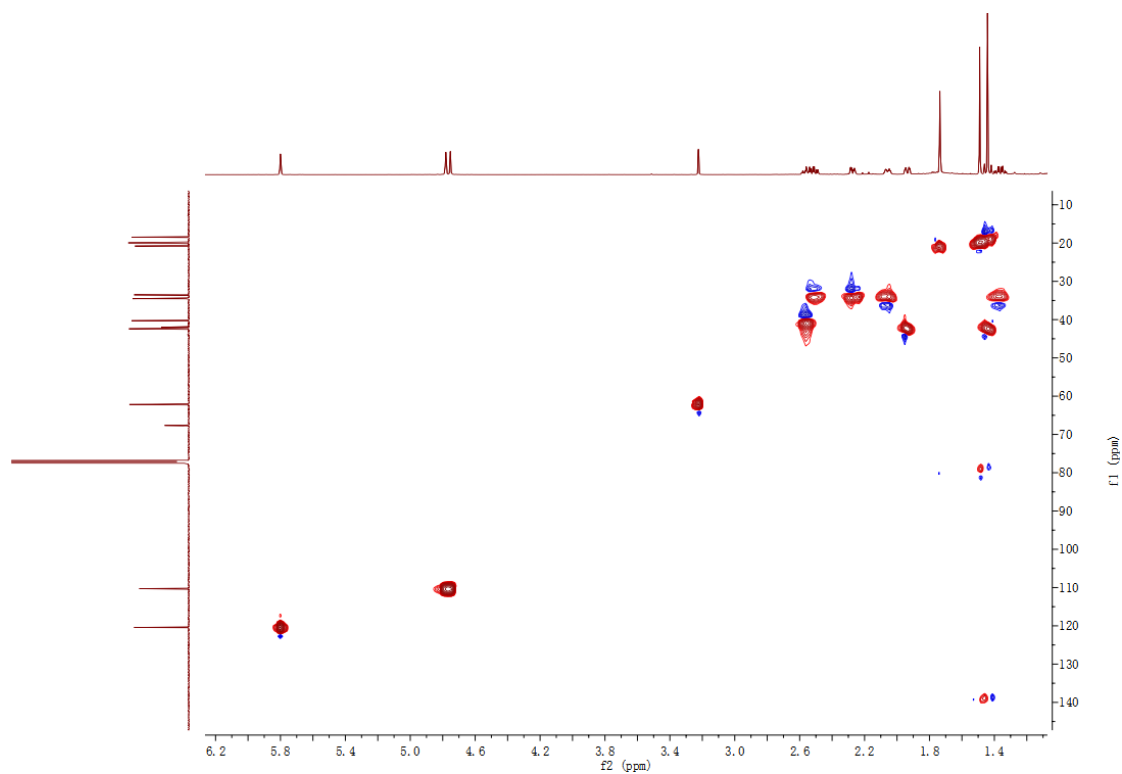

**Fig. S15 HSQC spectrum of compound 2**



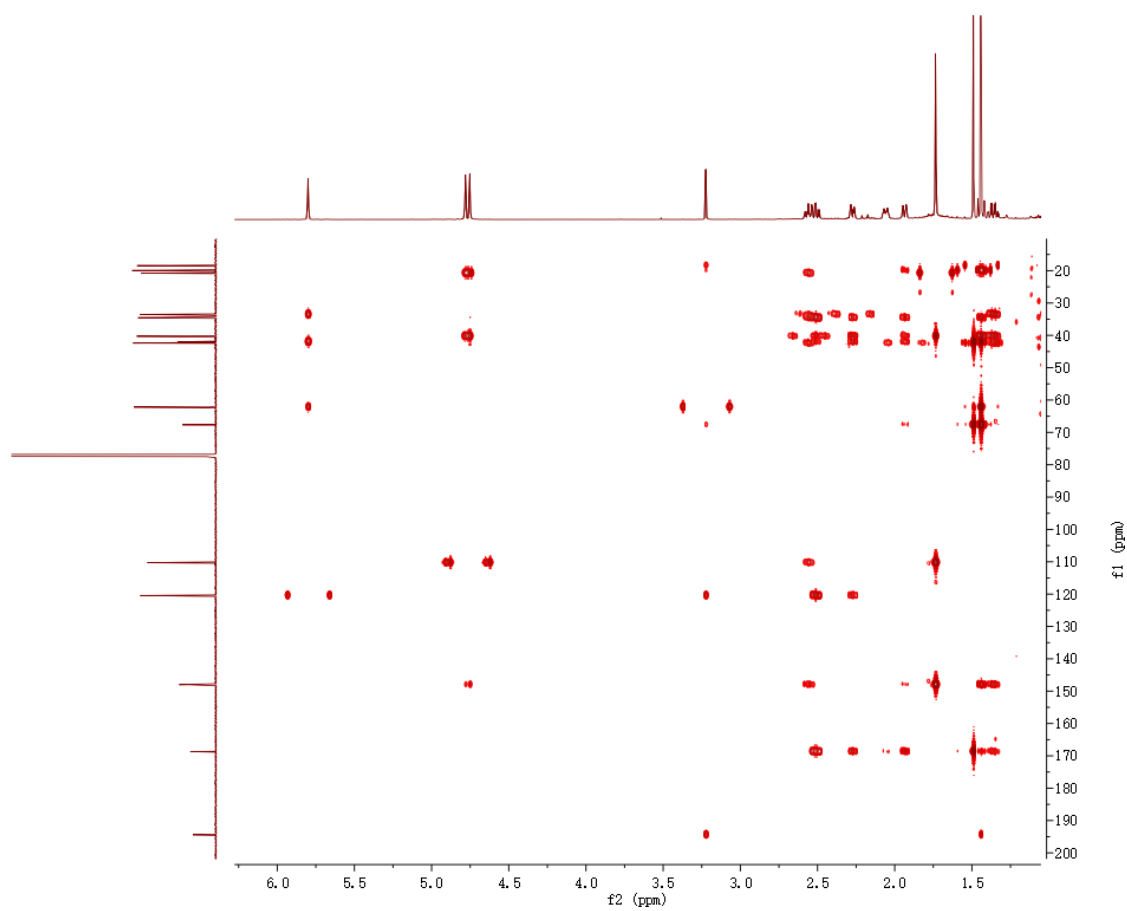

**Fig. S16** HMBC spectrum of compound **2**

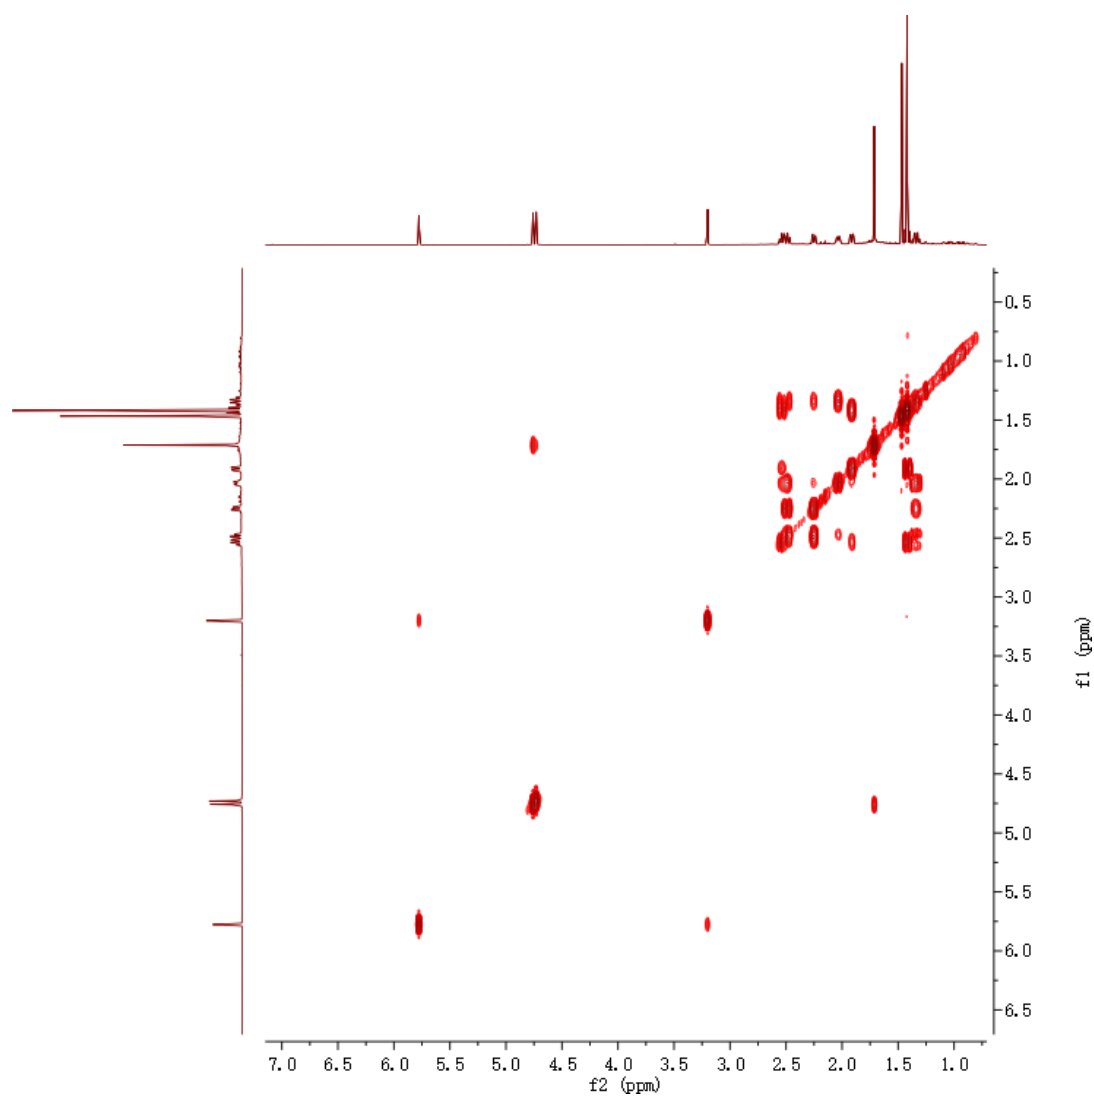

**Fig. S17**  $^1\text{H}$ - $^1\text{H}$  COSY spectrum of compound **2**

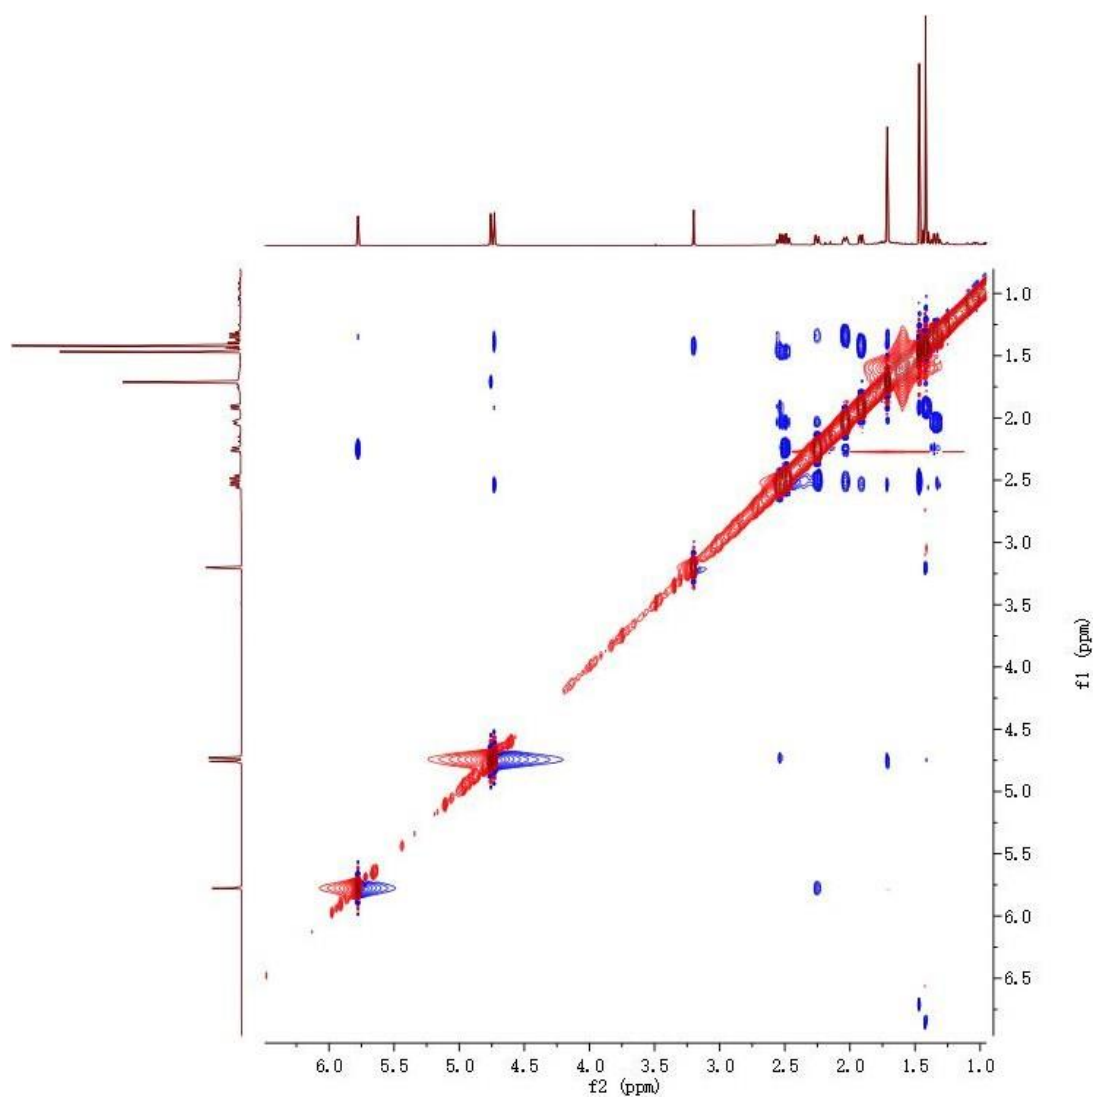

**Fig. S18** NOESY spectrum of compound 2

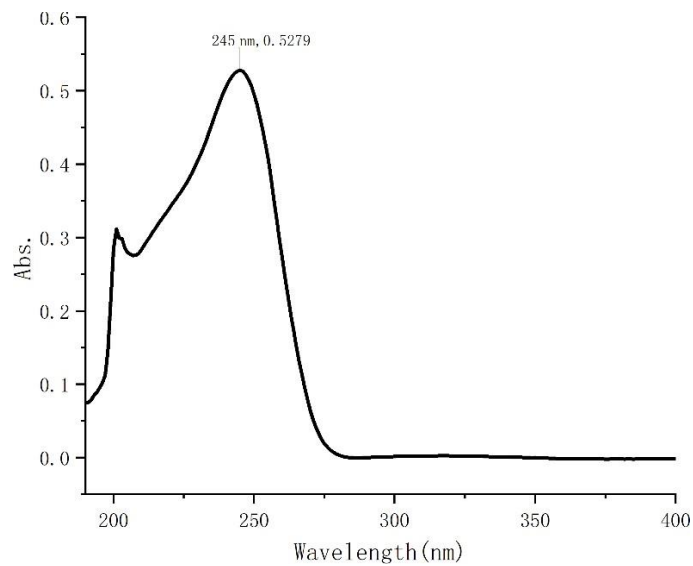

**Fig. S19 UV spectrum of compound 2**

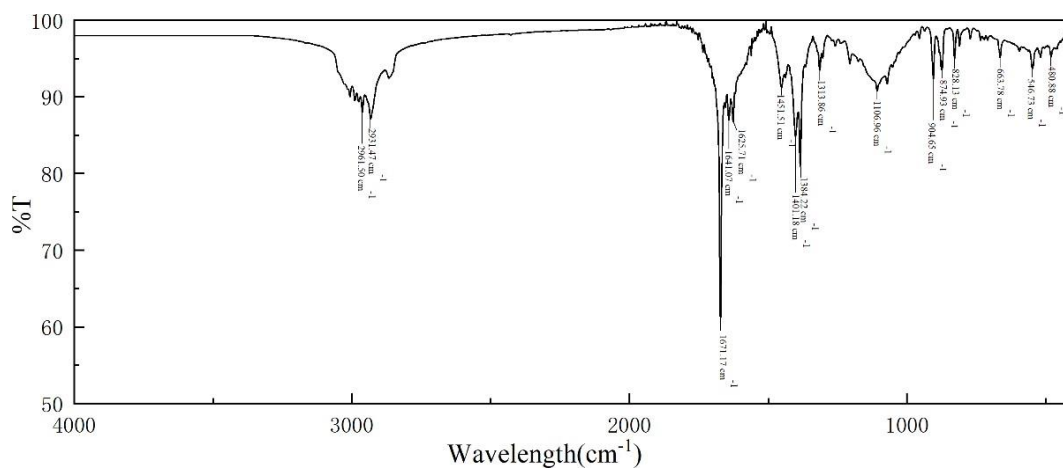

**Fig. S20 IR spectrum of compound 2**

## Single Mass Analysis

Tolerance = 5.0 mDa / DBE: min = -1.5, max = 50.0

Element prediction: Off

Number of isotope peaks used for i-FIT = 3

Monoisotopic Mass, Even Electron Ions

36 formula(e) evaluated with 1 results within limits (up to 50 best isotopic matches for each mass)

Elements Used:

C: 0-100 H: 0-200 O: 0-200

A04E411

20220111-22 212 (1.709)

1: TOF MS ES+  
8.83e+004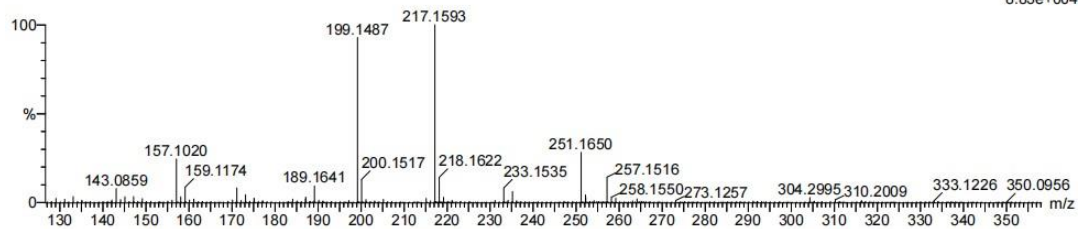

Minimum: -1.5  
Maximum: 5.0 10.0 50.0

| Mass     | Calc. Mass | mDa  | PPM  | DBE | i-FIT | Norm | Conf (%) | Formula    |
|----------|------------|------|------|-----|-------|------|----------|------------|
| 233.1535 | 233.1542   | -0.7 | -3.0 | 5.5 | 146.8 | n/a  | n/a      | C15 H21 O2 |

Fig. S21 HR-ESI-MS spectrum of compound 3

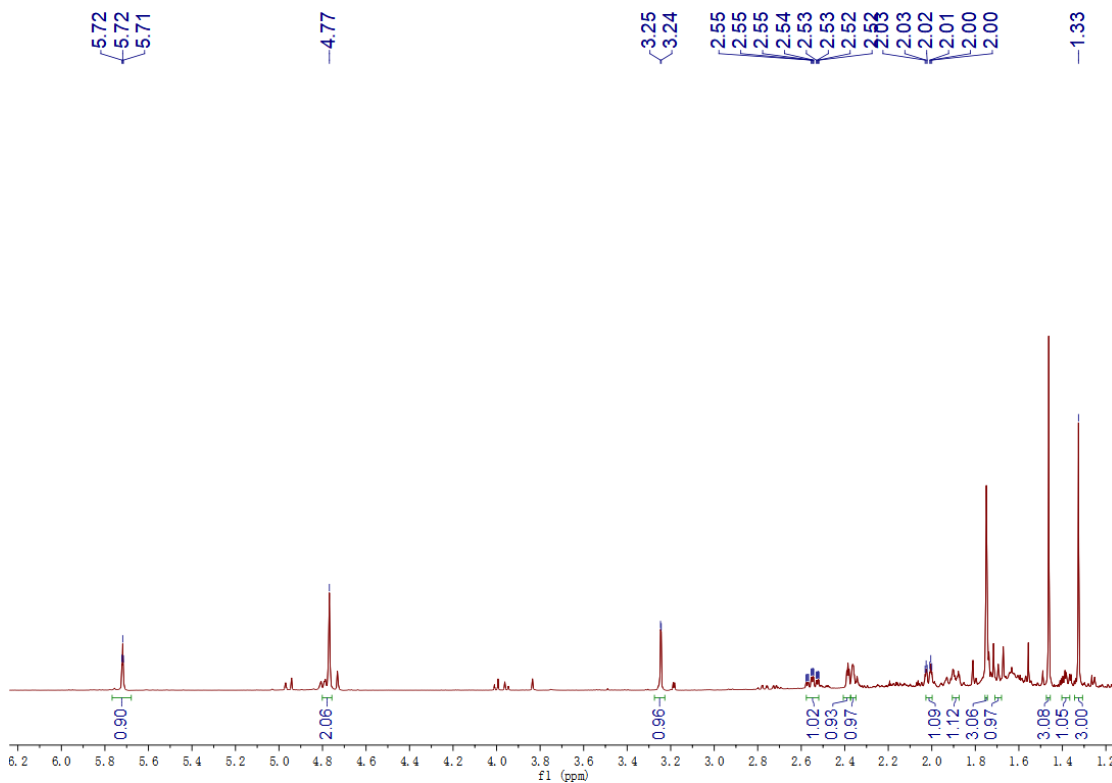Fig. S22  $^1\text{H}$  NMR (600 MHz,  $\text{CDCl}_3$ ) spectrum of compound 3

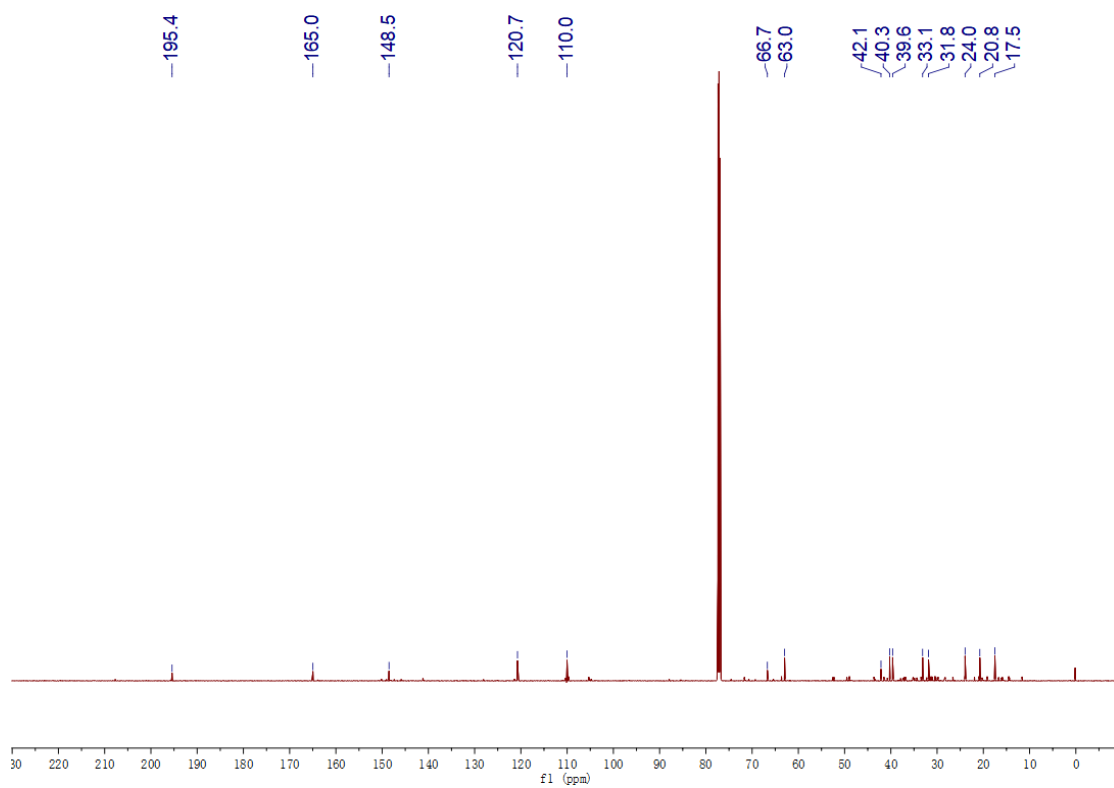

**Fig. S23**  $^{13}\text{C}$  NMR (150 MHz,  $\text{CDCl}_3$ ) spectrum of compound 3

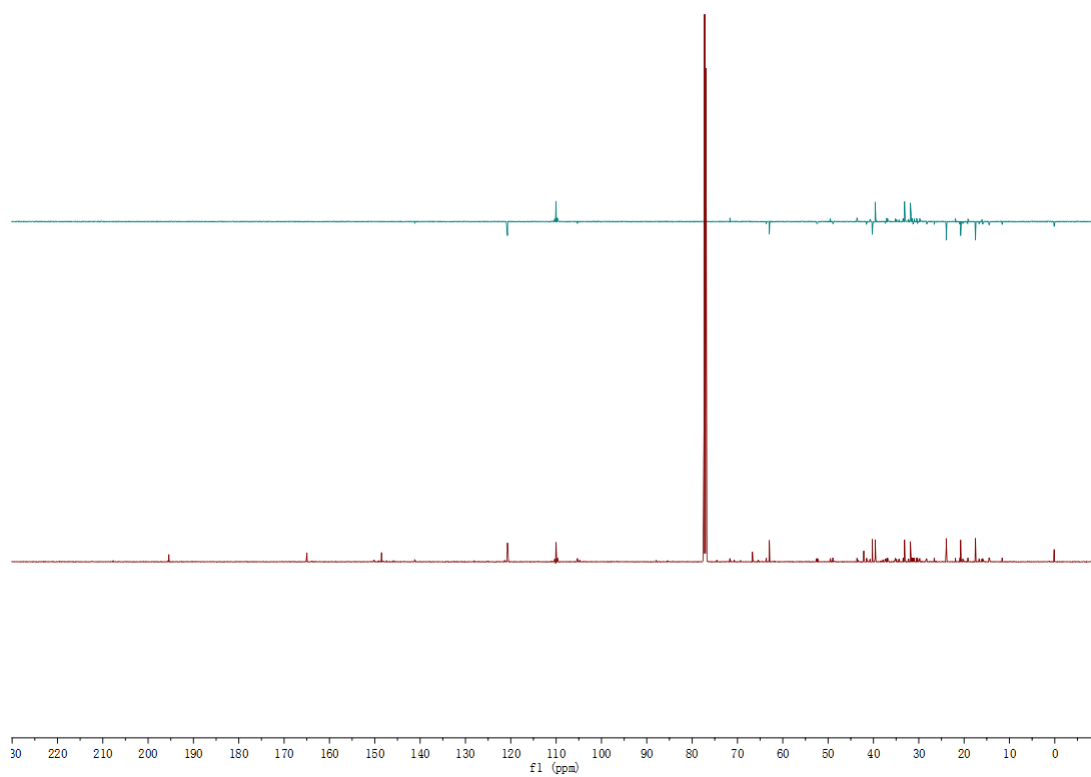

**Fig. S24 DEPT (150 MHz, CDCl<sub>3</sub>) and <sup>13</sup>C NMR spectra of compound 3**

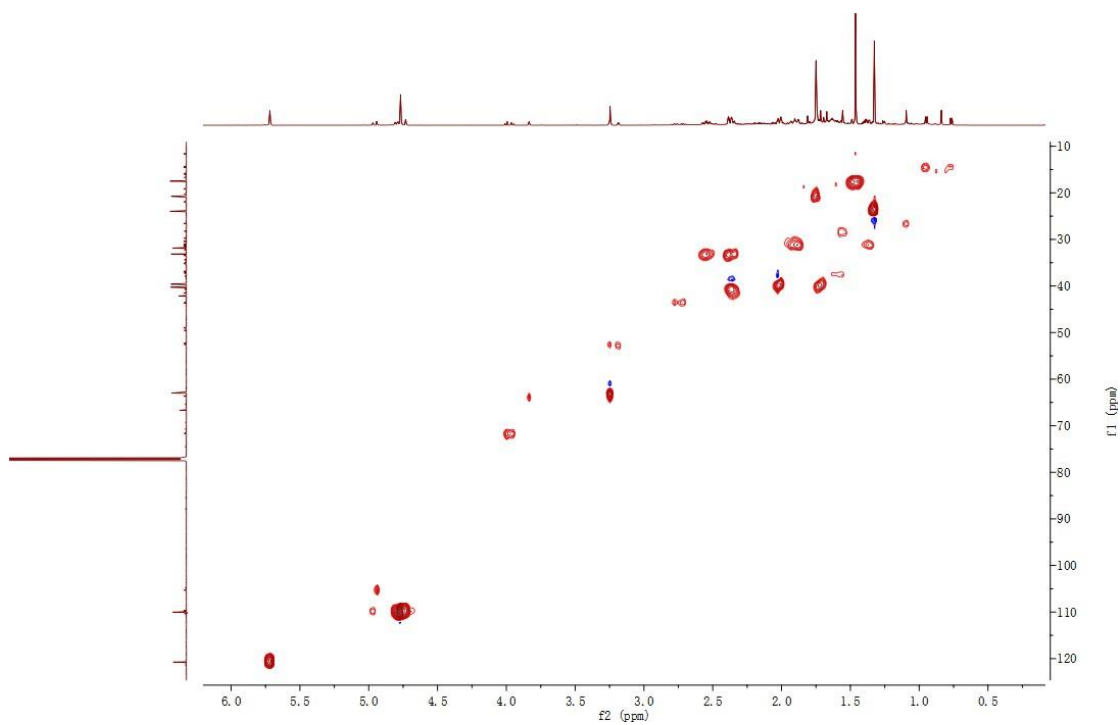

**Fig. S25 HSQC spectrum of compound 3**

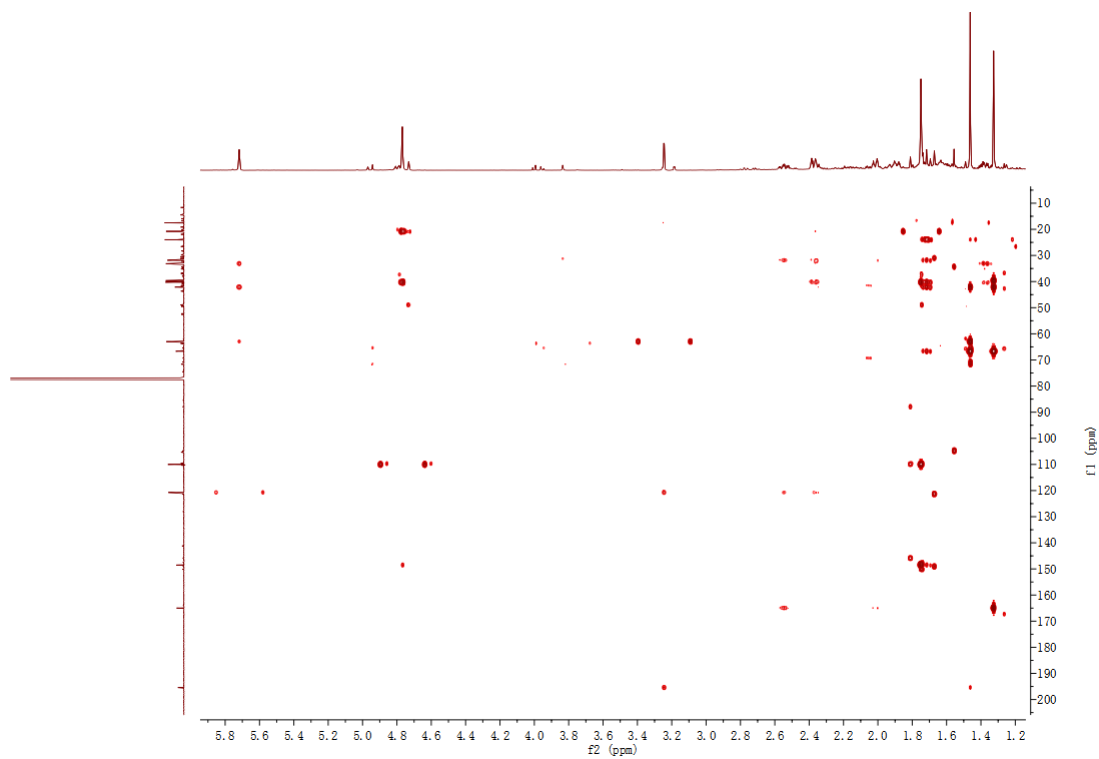

**Fig. S26** HMBC spectrum of compound **3**

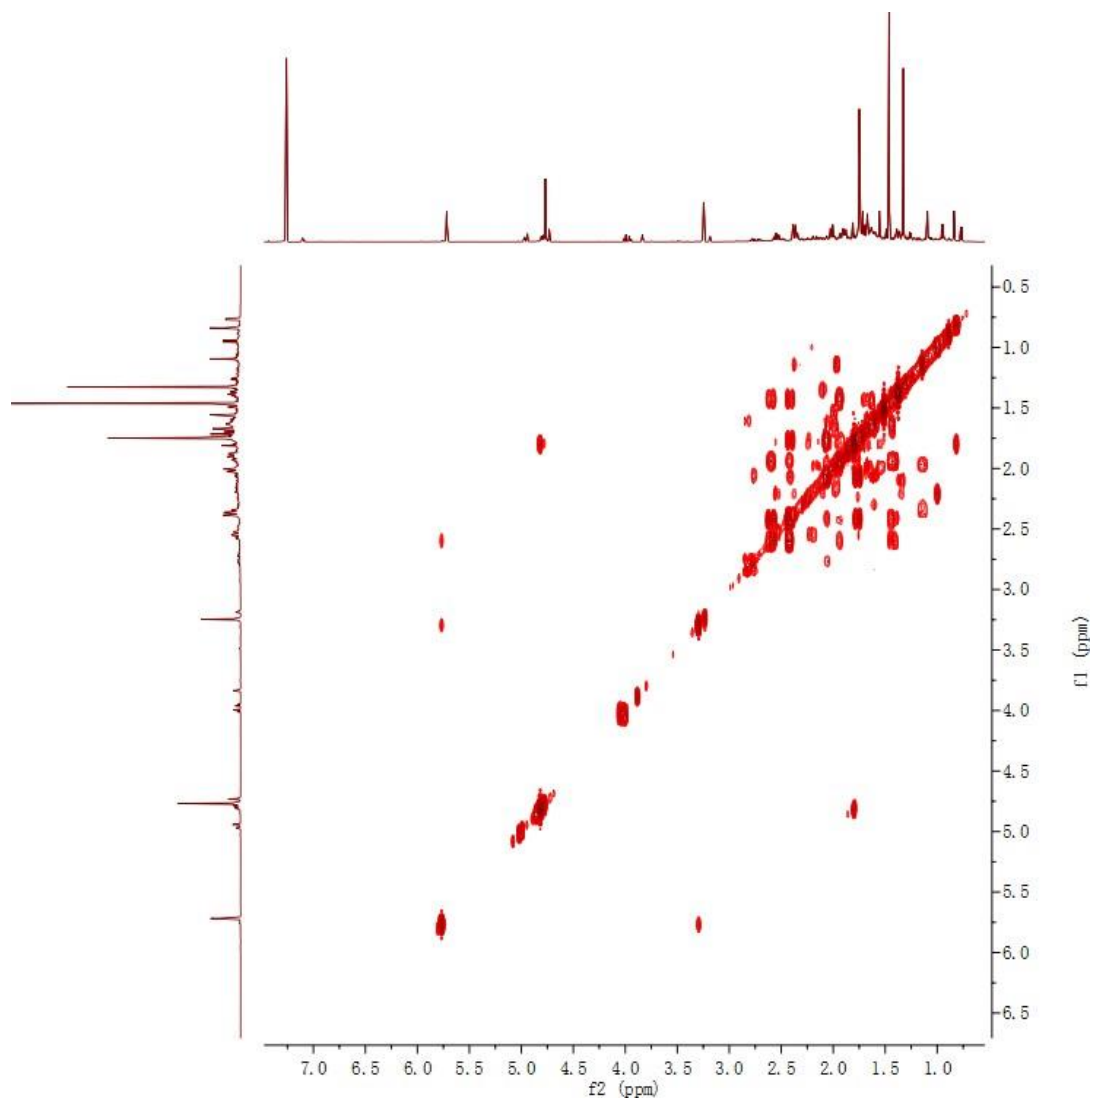

**Fig. S27** <sup>1</sup>H-<sup>1</sup>H COSY spectrum of compound **3**



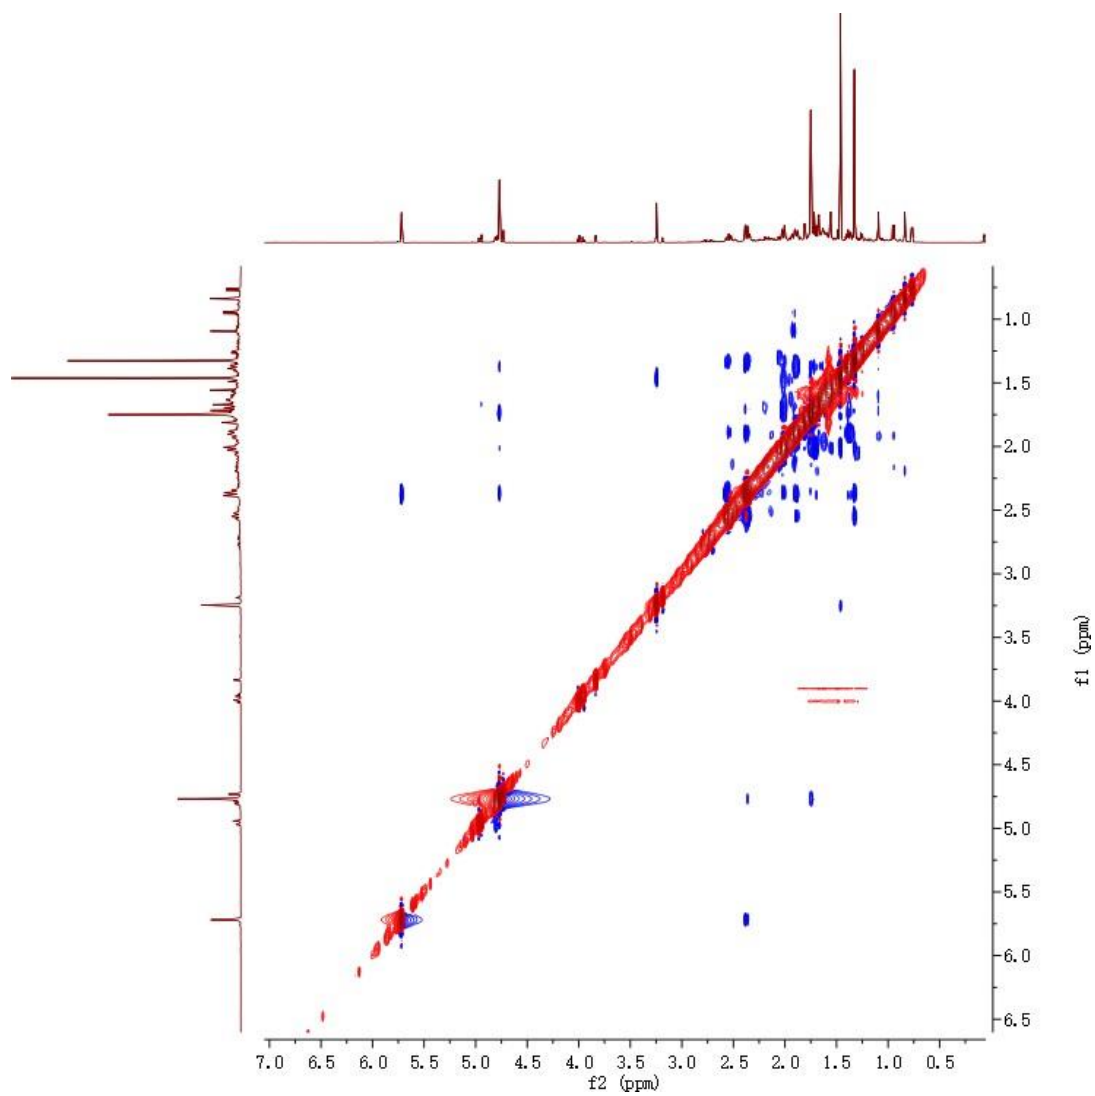

**Fig. S28** NOESY spectrum of compound **3**

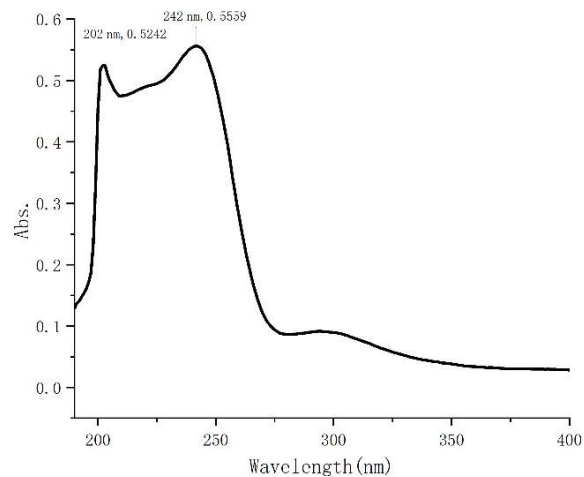

**Fig. S29** UV spectrum of compound **3**

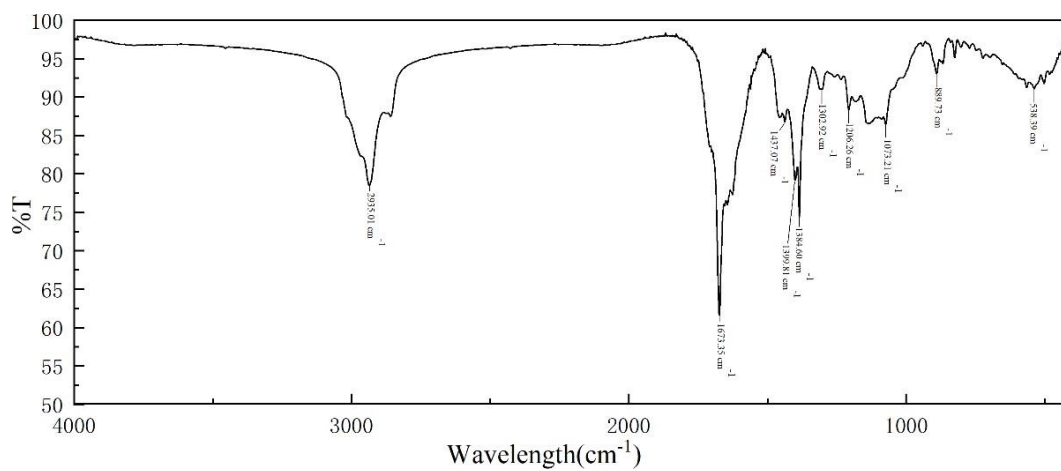

**Fig. S30** IR spectrum of compound **3**

## Single Mass Analysis

Tolerance = 5.0 mDa / DBE: min = -1.5, max = 50.0

Element prediction: Off

Number of isotope peaks used for i-FIT = 3

Monoisotopic Mass, Even Electron Ions

56 formula(e) evaluated with 2 results within limits (up to 50 best isotopic matches for each mass)

Elements Used:

C: 0-100 H: 0-200 O: 0-200 Na: 0-1

A04E6D11B

20220523053 258 (2.076)

1: TOF MS ES+  
1.63e+005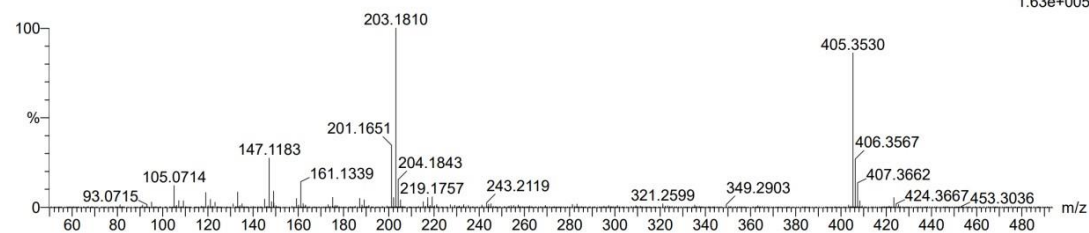

Minimum: -1.5  
Maximum: 5.0 10.0 50.0

| Mass     | Calc. Mass | mDa | PPM  | DBE | i-FIT | Norm  | Conf (%) | Formula    |
|----------|------------|-----|------|-----|-------|-------|----------|------------|
| 203.1810 | 203.1800   | 1.0 | 4.9  | 4.5 | 397.1 | 0.529 | 58.94    | C15 H23    |
|          | 203.1776   | 3.4 | 16.7 | 1.5 | 397.4 | 0.890 | 41.06    | C13 H24 Na |

Fig. S31 HR-ESI-MS spectrum of compound 4

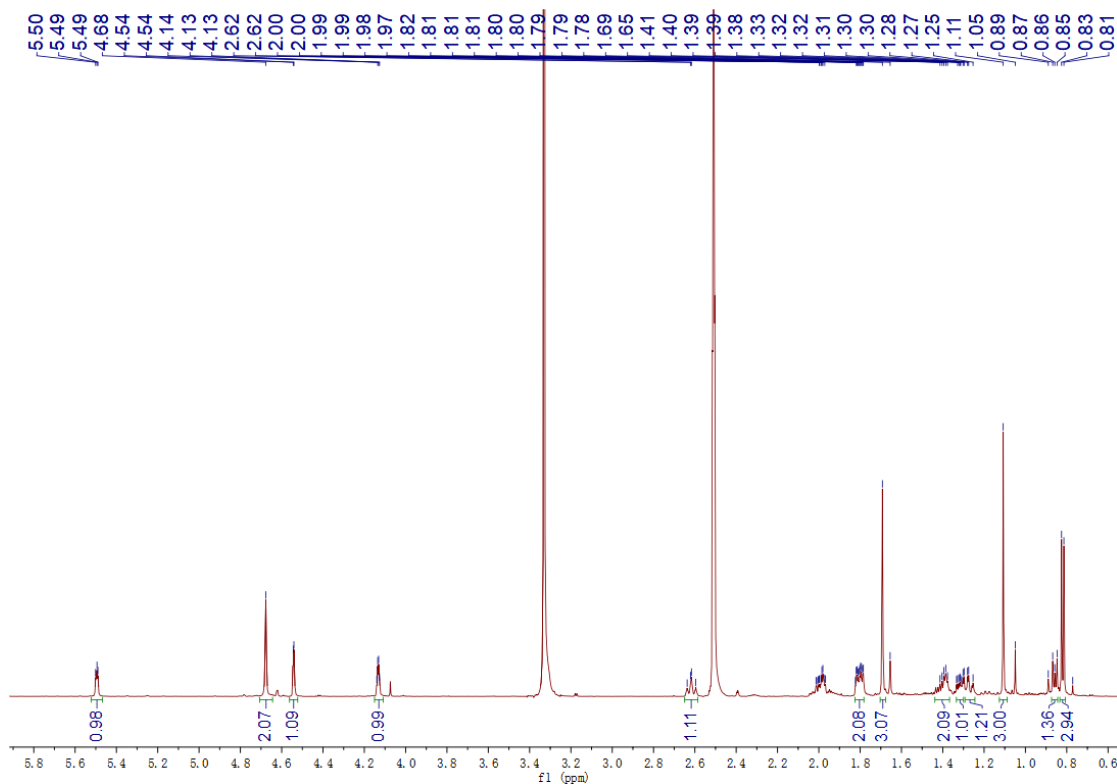Fig. S32 <sup>1</sup>H NMR (600 MHz, DMSO-*d*<sub>6</sub>) spectrum of compound 4

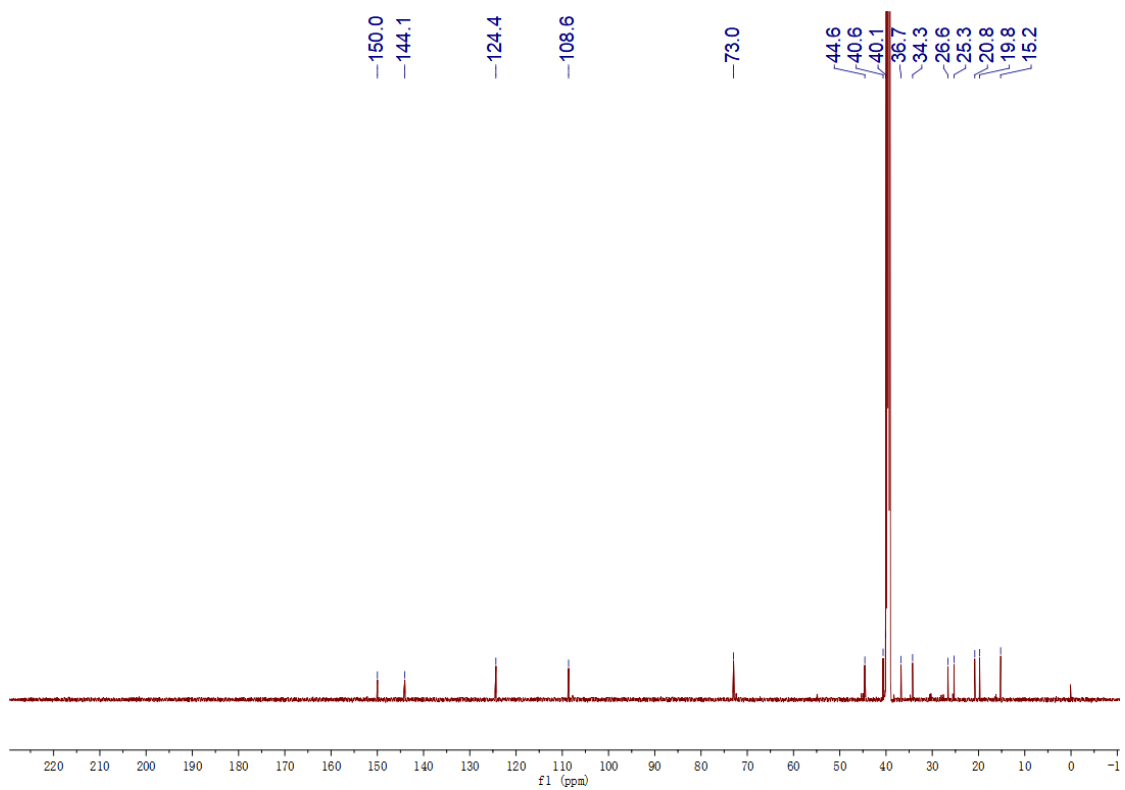

**Fig. S33**  $^{13}\text{C}$  NMR (150 MHz,  $\text{DMSO-}d_6$ ) spectrum of compound **4**

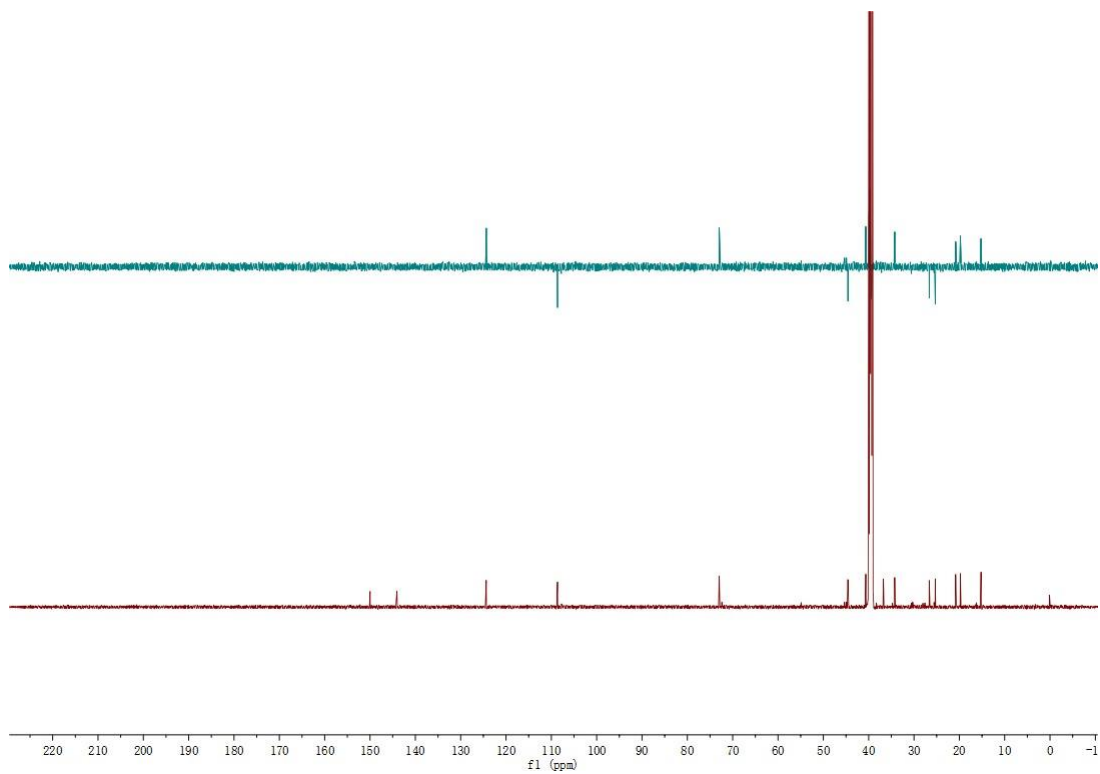

**Fig. S34 DEPT (150 MHz, DMSO-*d*<sub>6</sub>) and <sup>13</sup>C NMR spectra of compound 4**

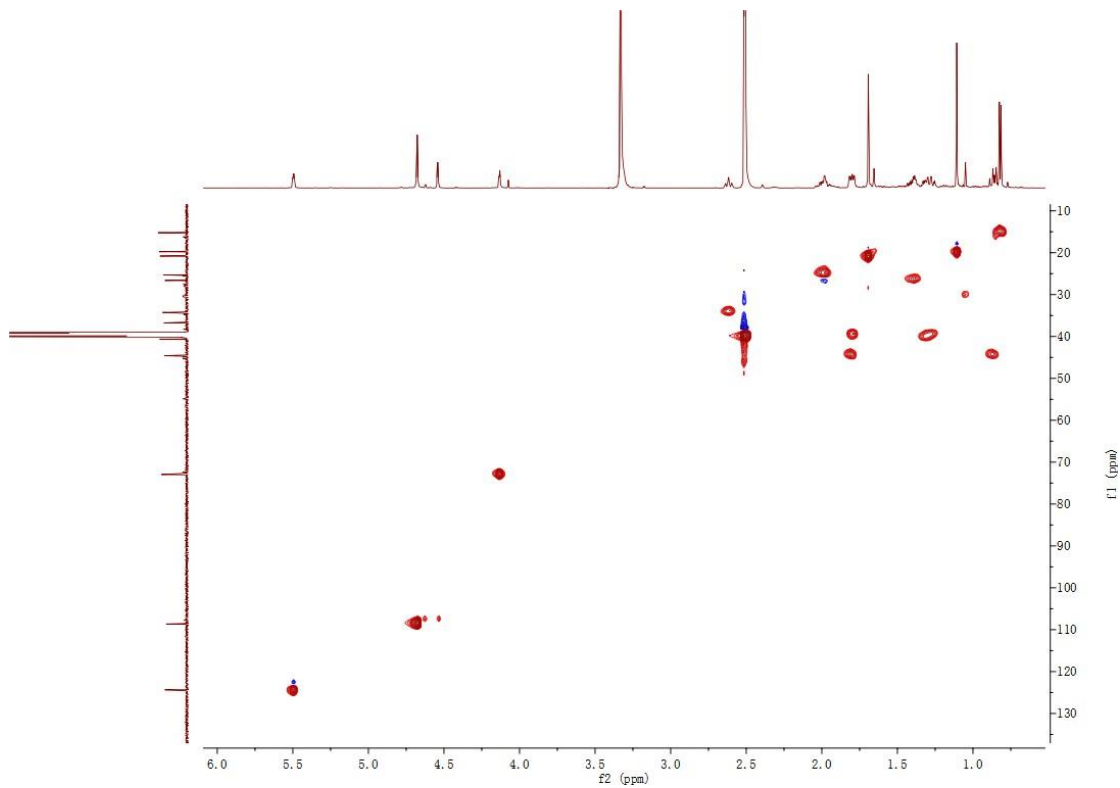

**Fig. S35 HSQC spectrum of compound 4**

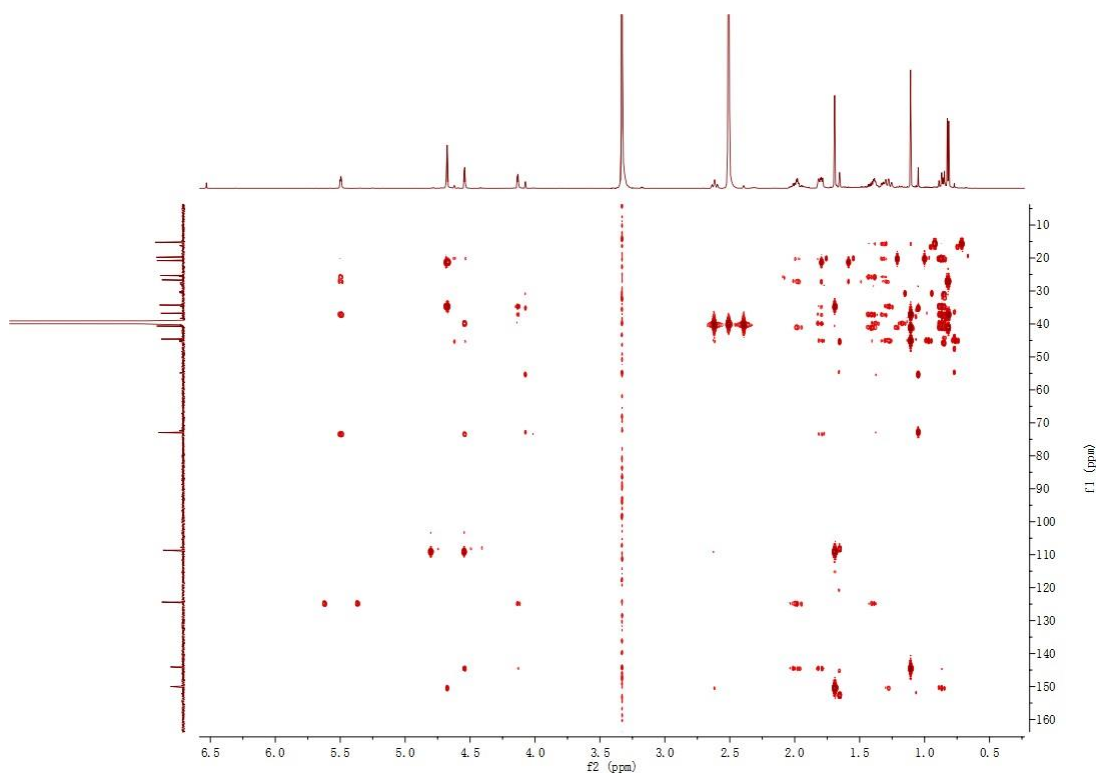

**Fig. S36 HMBC spectrum of compound 4**

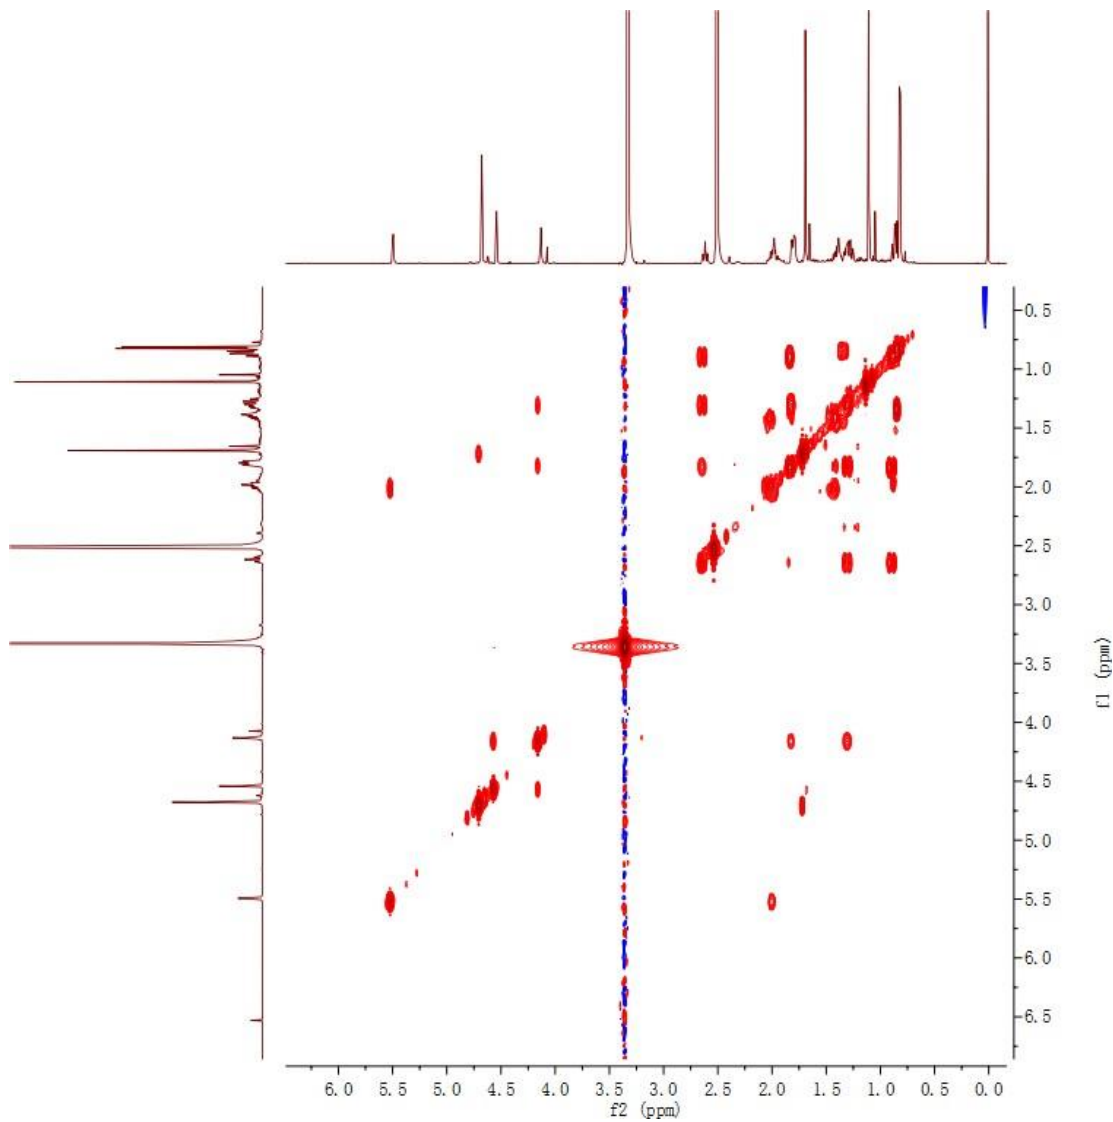

**Fig. S37  $^1\text{H}$ - $^1\text{H}$  COSY spectrum of compound 4**

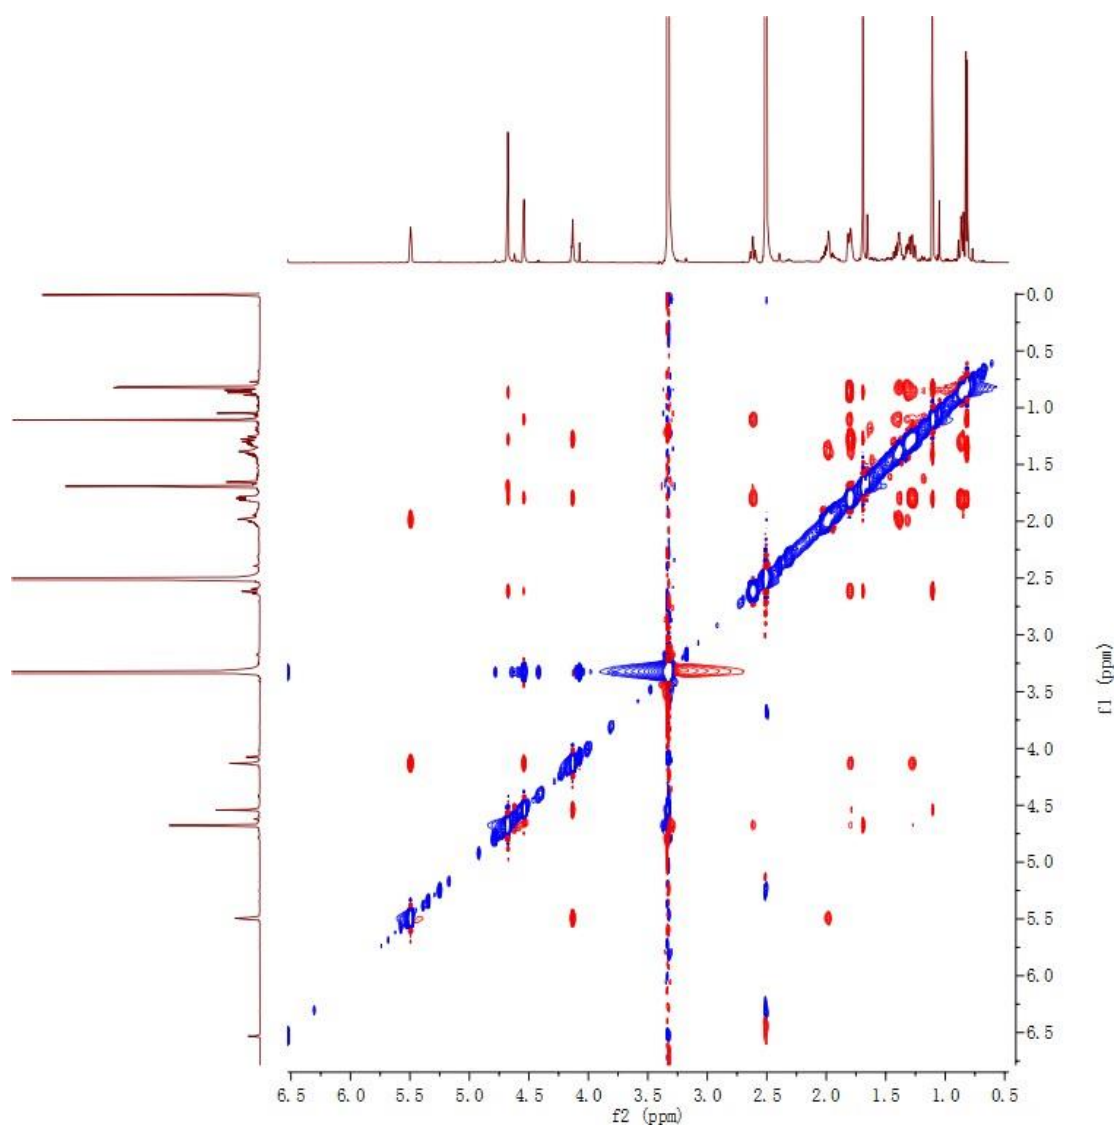

**Fig. S38** NOESY spectrum of compound **4**

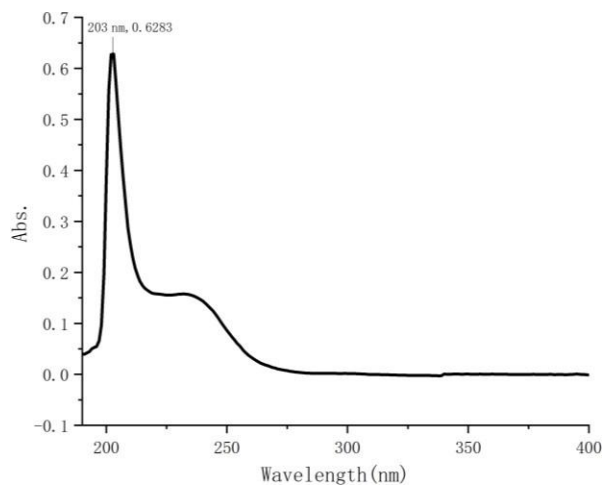

**Fig. S39** UV spectrum of compound **4**

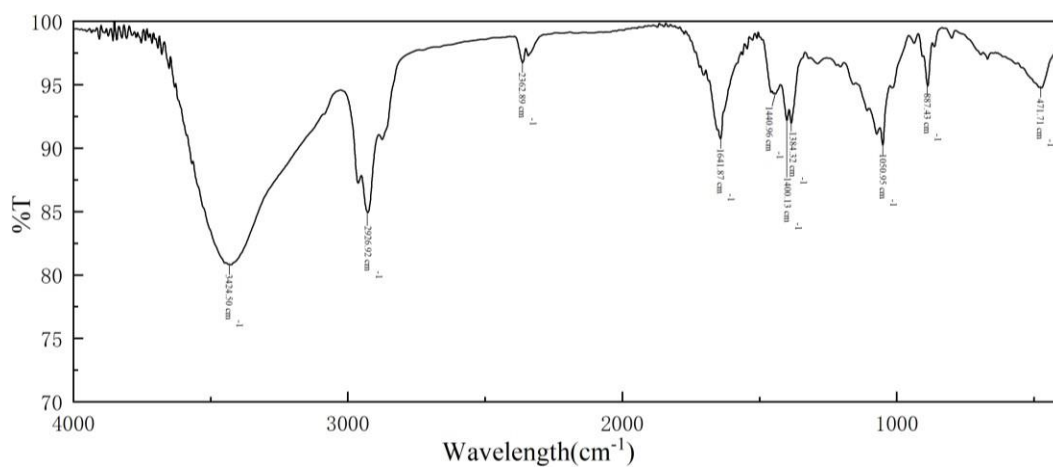

**Fig. S40** IR spectrum of compound **4**



## Single Mass Analysis

Tolerance = 5.0 mDa / DBE: min = -1.5, max = 50.0

Element prediction: Off

Number of isotope peaks used for i-FIT = 3

Monoisotopic Mass, Even Electron Ions

65 formula(e) evaluated with 2 results within limits (up to 50 best isotopic matches for each mass)

Elements Used:

C: 0-500 H: 0-1000 O: 0-200 Na: 0-1

AO3F5E1

20210913-23 141 (1.145)

1: TOF MS ES+  
3.46e+004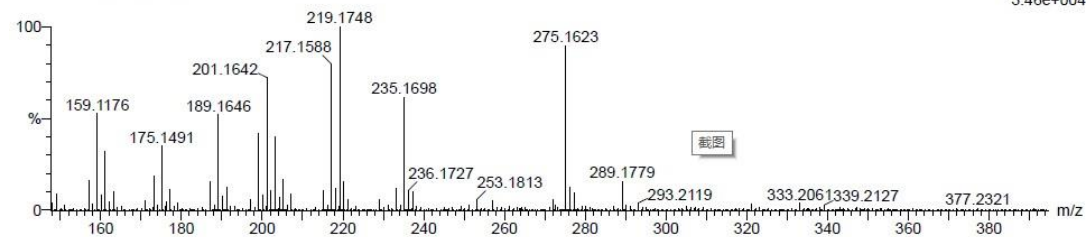

Minimum: -1.5  
Maximum: 50.0

| Mass     | Calc. Mass | mDa | PPM | DBE | i-FIT | Formula                                           |
|----------|------------|-----|-----|-----|-------|---------------------------------------------------|
| 237.1859 | 237.1855   | 0.4 | 1.7 | 3.5 | 177.1 | C <sub>15</sub> H <sub>25</sub> O <sub>2</sub> .. |

Fig. S41 HR-ESI-MS spectrum of compound 5

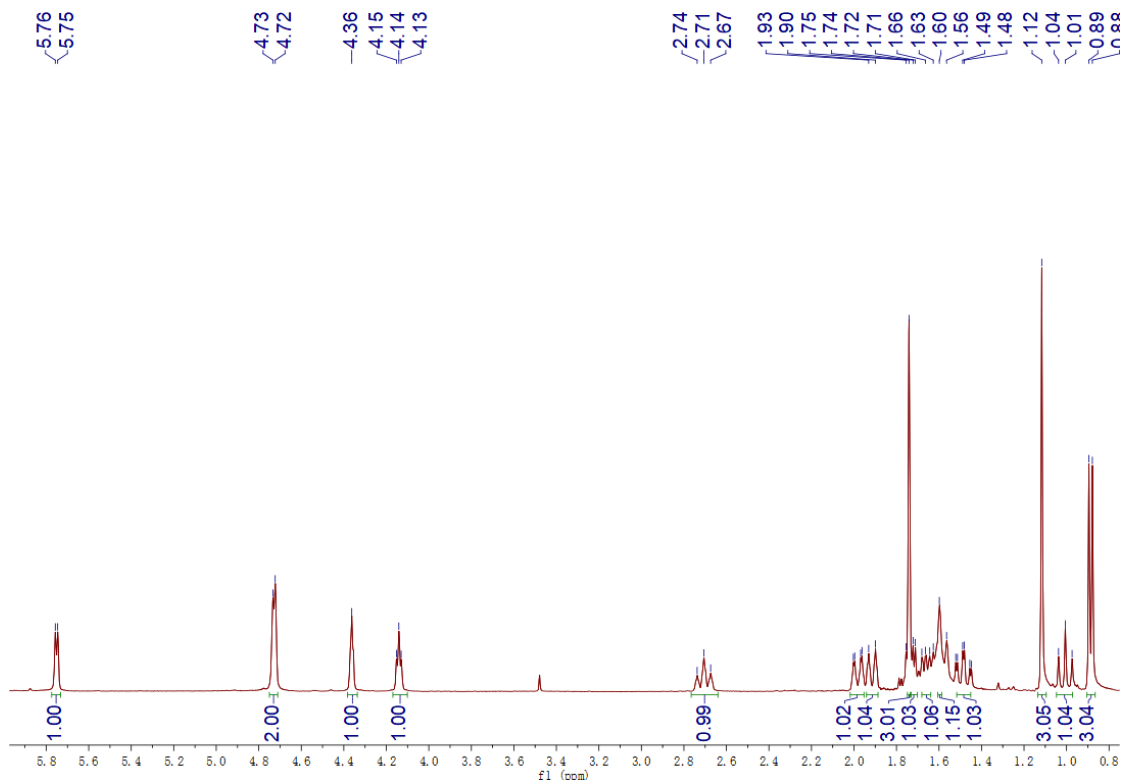Fig. S42 <sup>1</sup>H NMR (400 MHz, CDCl<sub>3</sub>) spectrum of compound 5

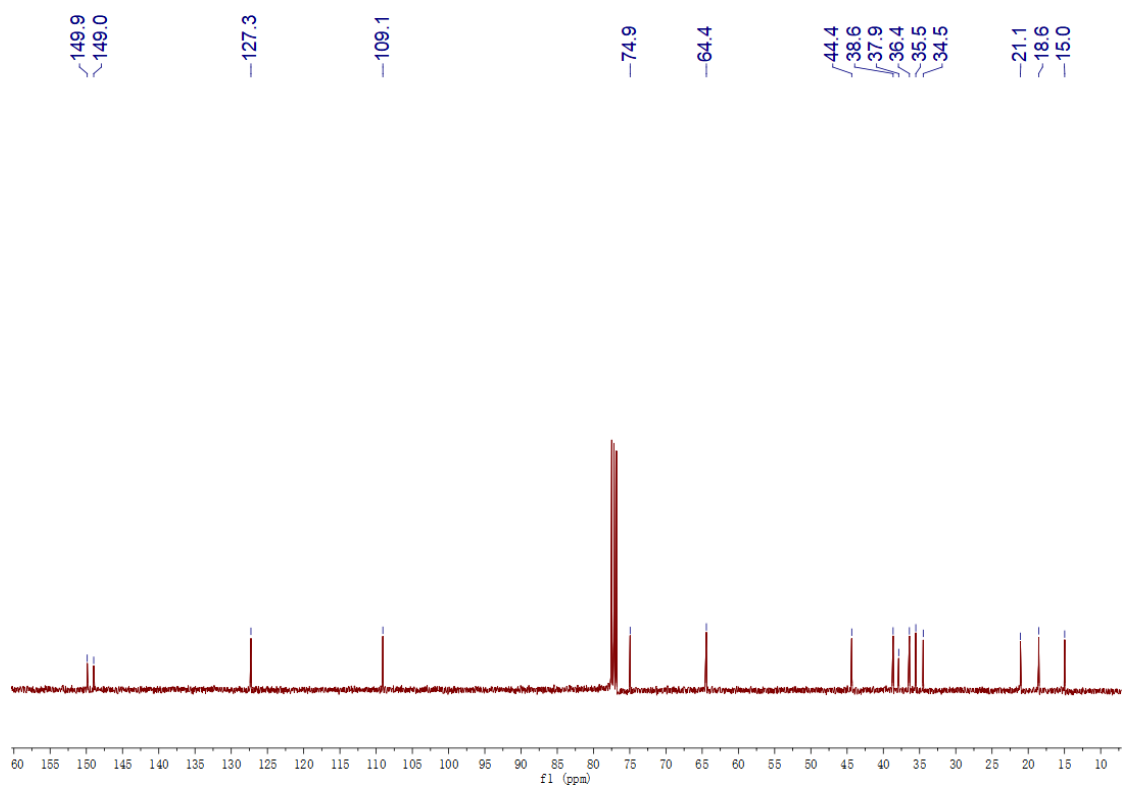

**Fig. S43**  $^{13}\text{C}$  NMR (100 MHz,  $\text{CDCl}_3$ ) spectrum of compound **5**

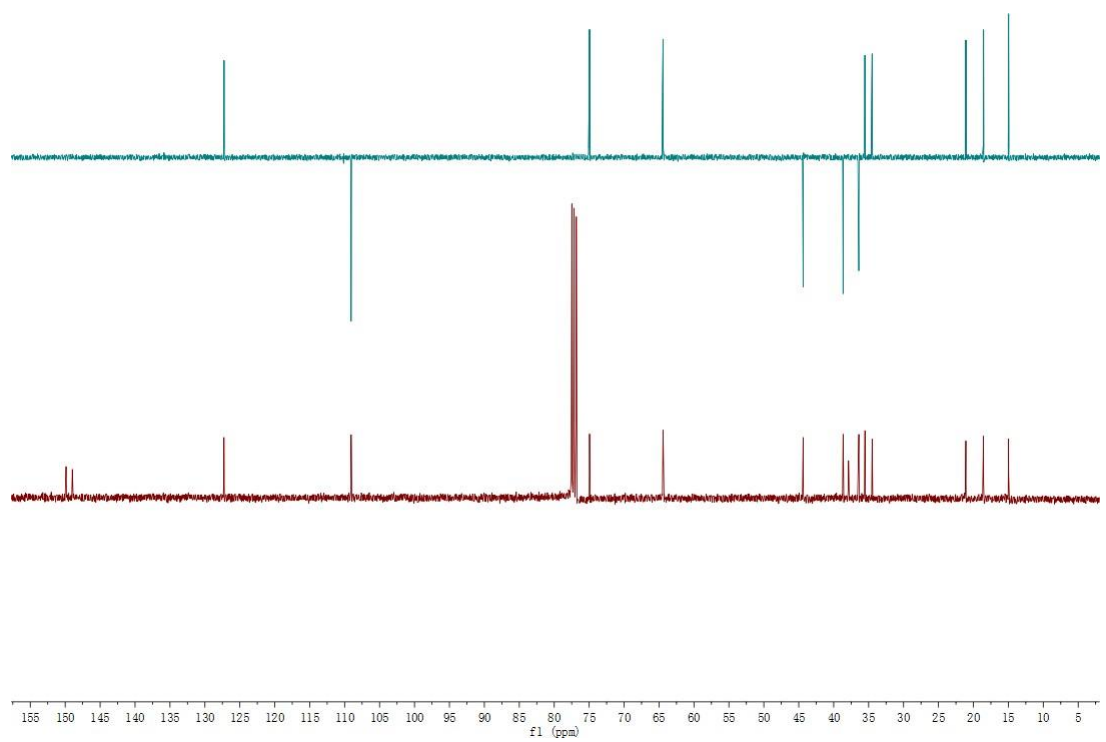

**Fig. S44 DEPT (100 MHz, CDCl<sub>3</sub>) and <sup>13</sup>C NMR spectra of compound 5**

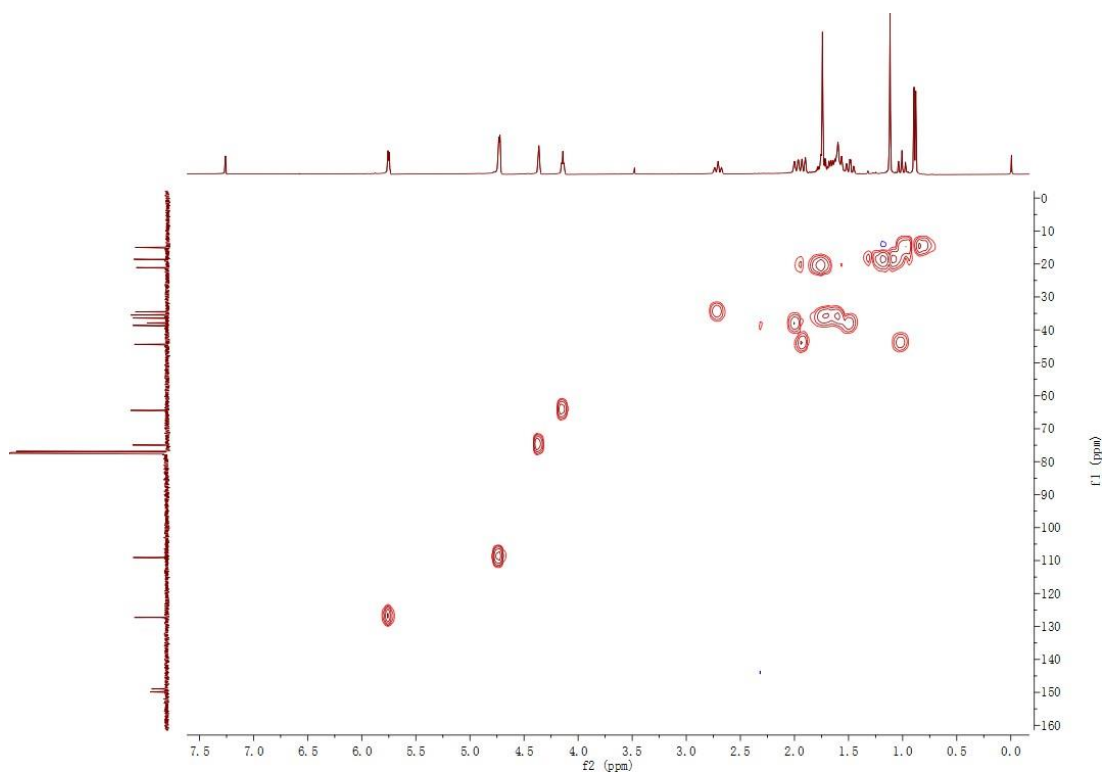

**Fig. S45 HSQC spectrum of compound 5**

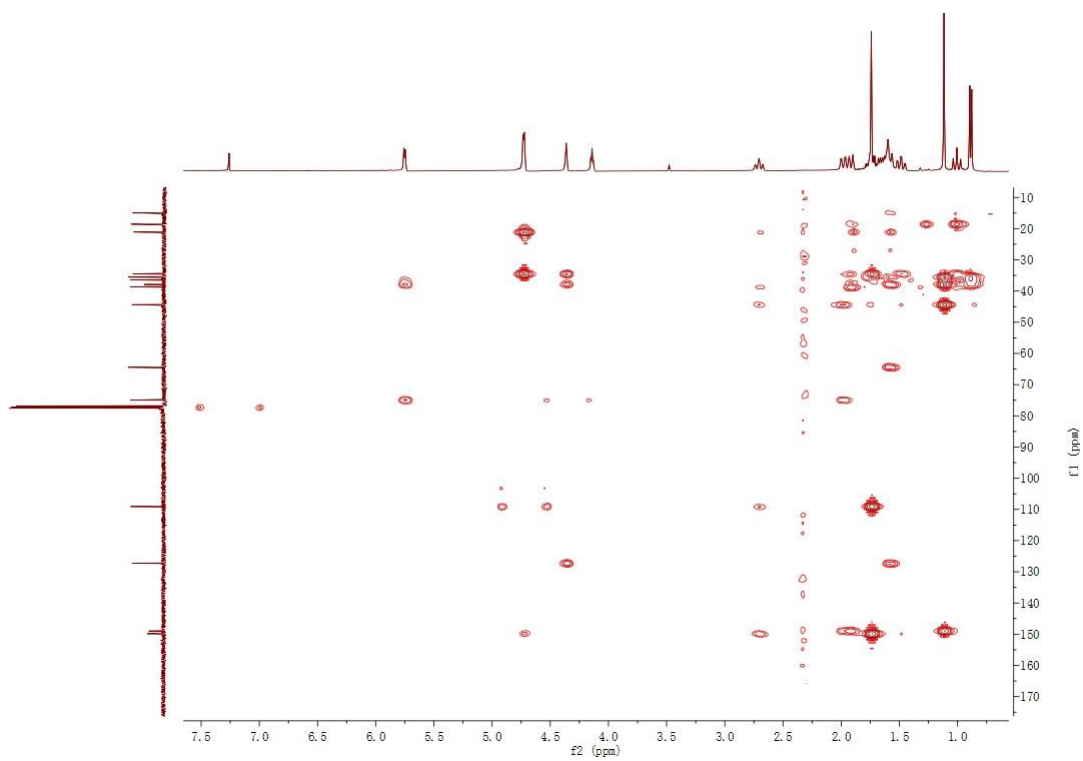

**Fig. S46 HMBC spectrum of compound 5**

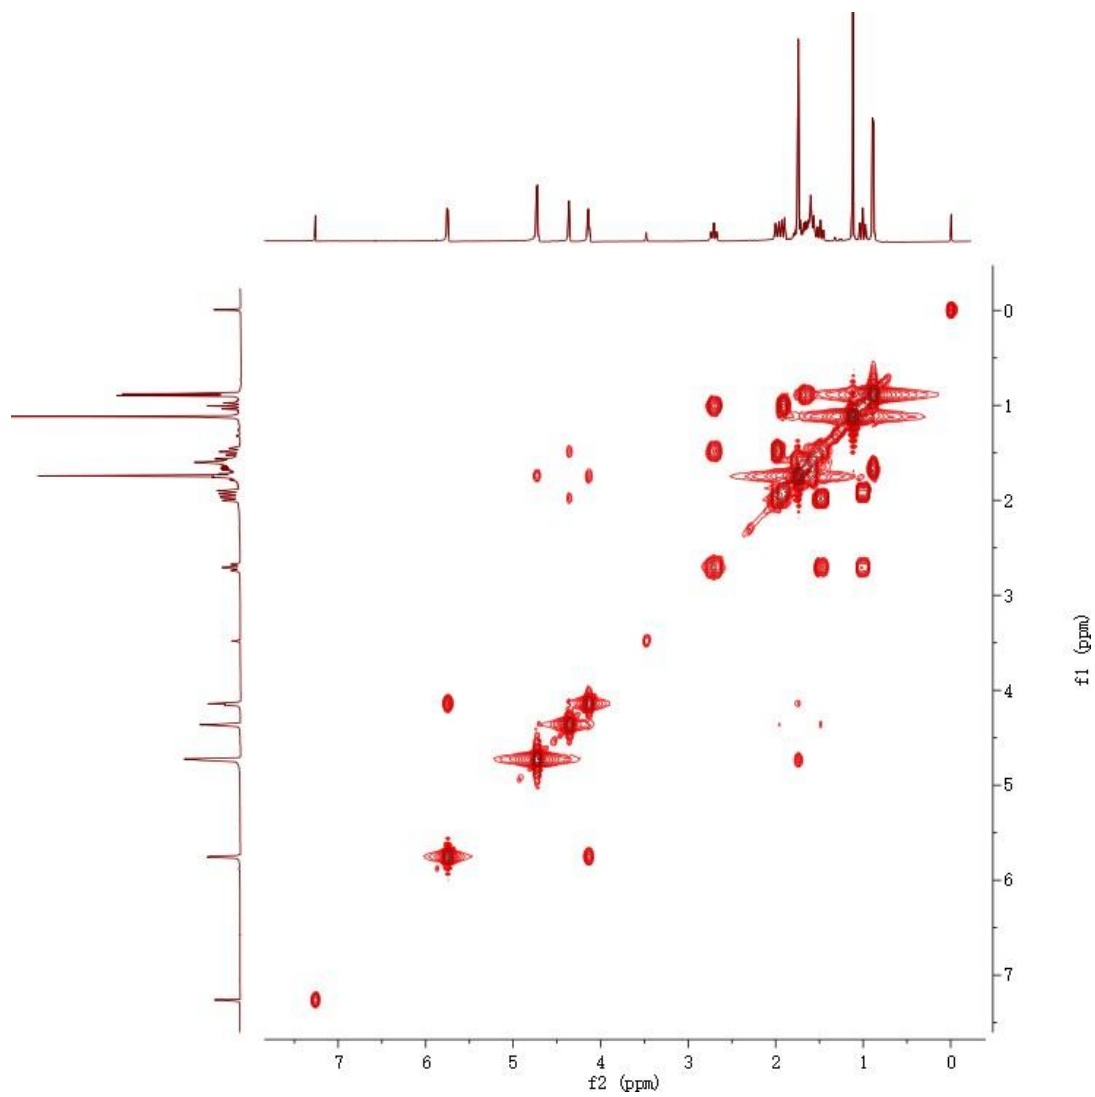

**Fig. S47  $^1\text{H}$ - $^1\text{H}$  COSY spectrum of compound 5**

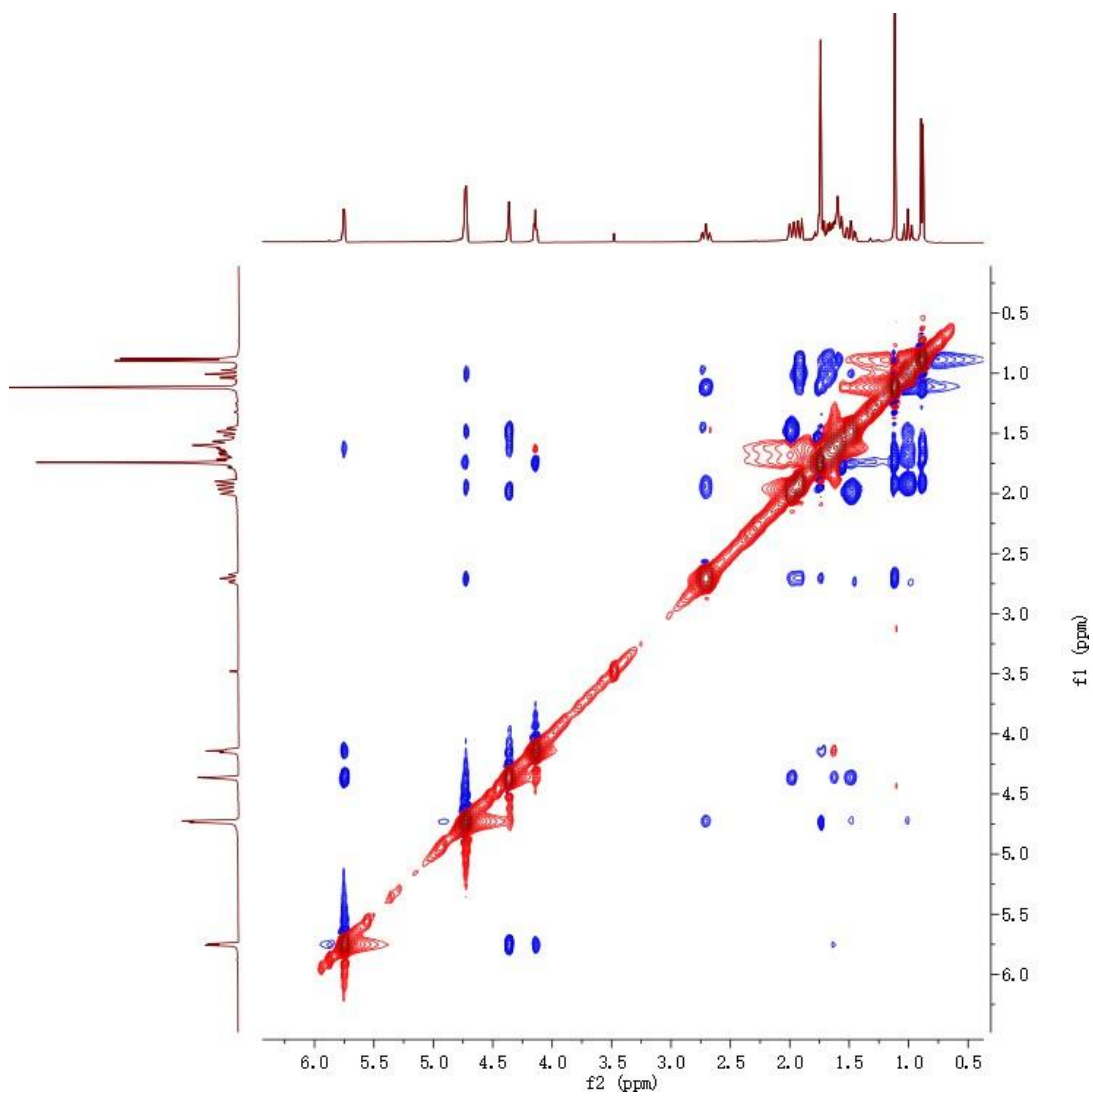

**Fig. S48** NOESY spectrum of compound **5**

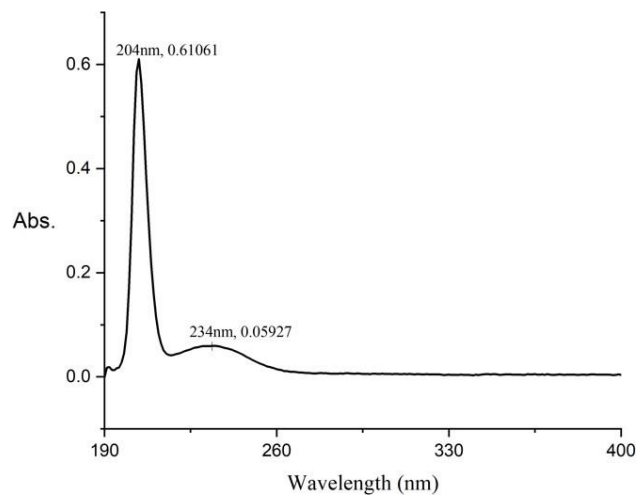

**Fig. S49 UV spectrum of compound 5**

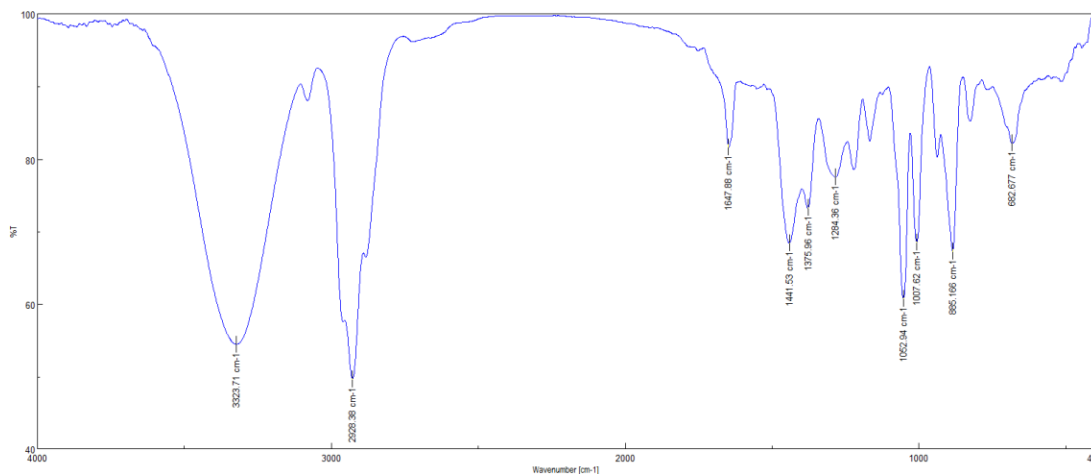

**Fig. S50 IR spectrum of compound 5**

**Elemental Composition Report**

**Single Mass Analysis**

Tolerance = 5.0 mDa / DBE: min = -1.5, max = 50.0

Element prediction: Off

Number of isotope peaks used for i-FIT = 3

Monoisotopic Mass, Even Electron Ions

81 formula(e) evaluated with 2 results within limits (up to 50 best isotopic matches for each mass)

Elements Used:

C: 0-500 H: 0-1000 O: 0-200 Na: 0-1

AO3F5J5

20210902012 154 (1.253)

1: TOF MS ES+  
1.10e+003

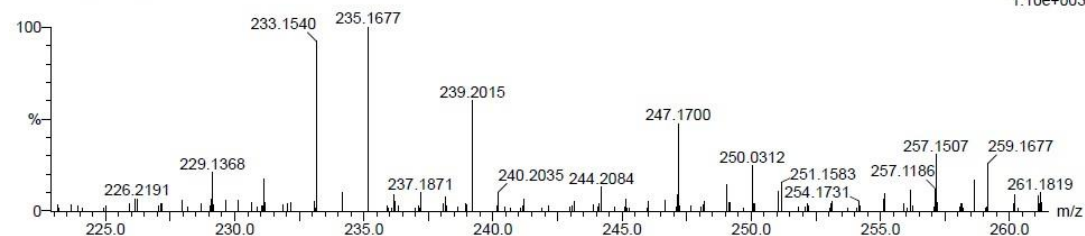

Minimum:

Maximum: 5.0 10.0 -1.5 50.0

| Mass     | Calc. Mass | mDa | PPM | DBE | i-FIT | Formula                                           |
|----------|------------|-----|-----|-----|-------|---------------------------------------------------|
| 259.1677 | 259.1674   | 0.3 | 1.2 | 3.5 | 50.2  | C <sub>15</sub> H <sub>24</sub> O <sub>2</sub> Na |

**Fig. S51 HR-ESI-MS spectrum of compound 6**

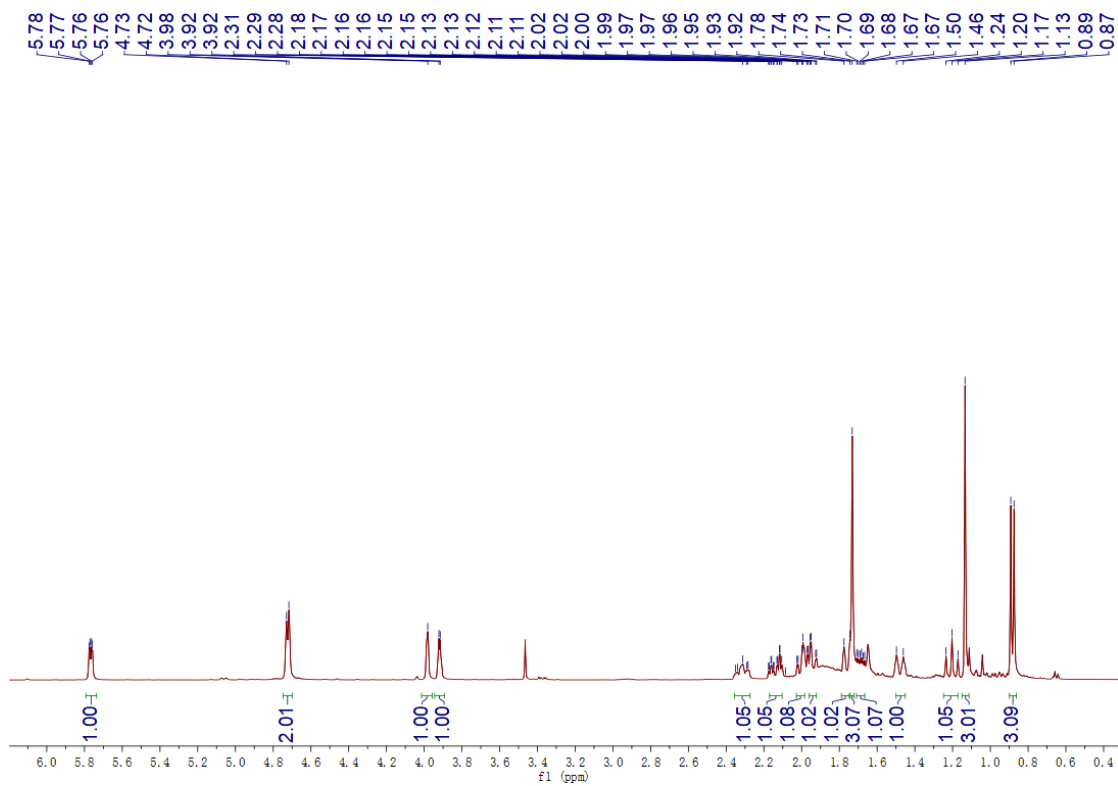

**Fig. S52  $^1\text{H}$  NMR (400 MHz,  $\text{CDCl}_3$ ) spectrum of compound 6**

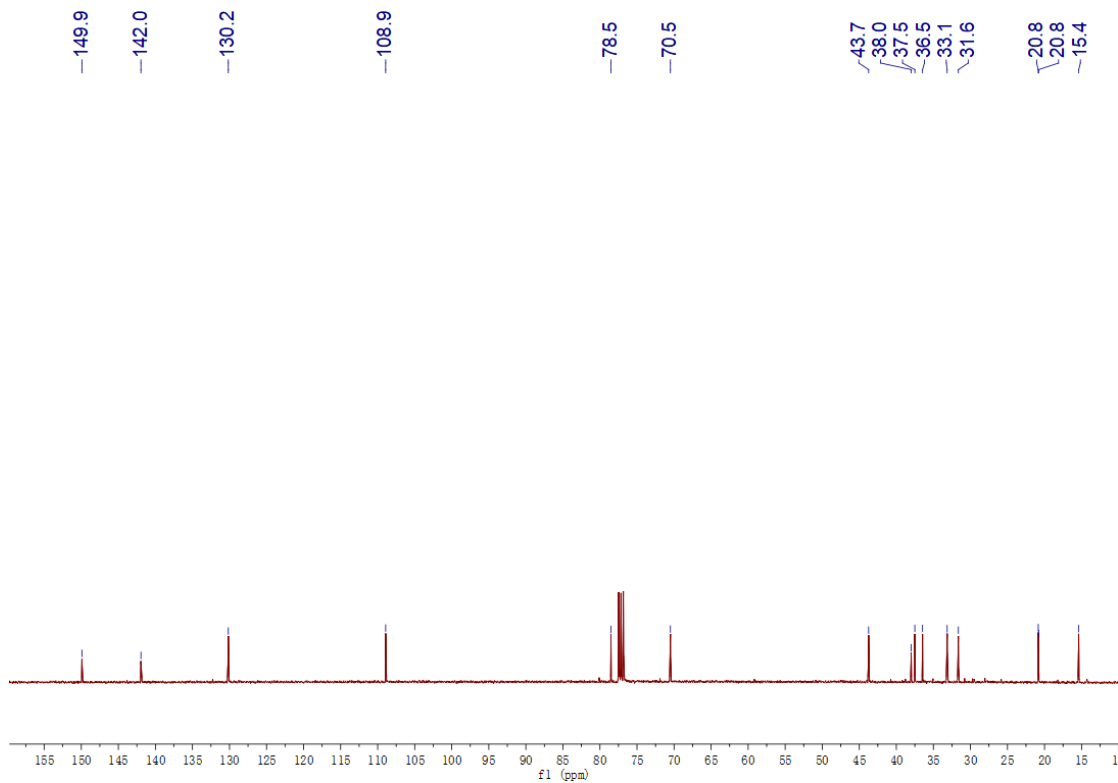

**Fig. S53  $^{13}\text{C}$  NMR (100 MHz,  $\text{CDCl}_3$ ) spectrum of compound 6**

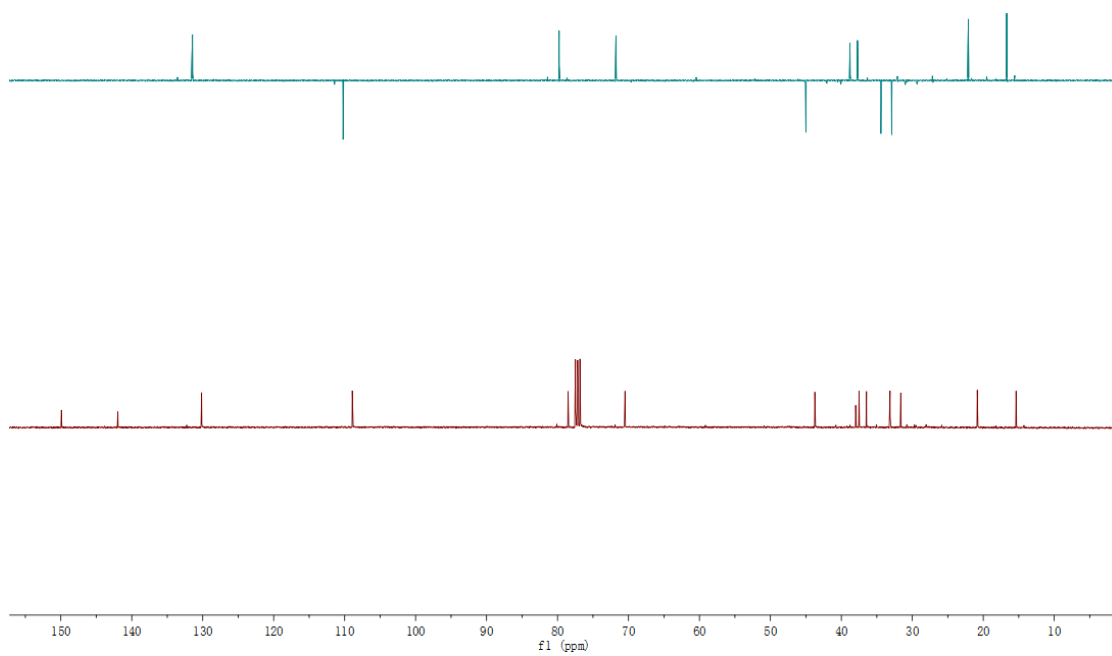

**Fig. S54 DEPT (100 MHz, CDCl<sub>3</sub>) and <sup>13</sup>C NMR spectra of compound 6**

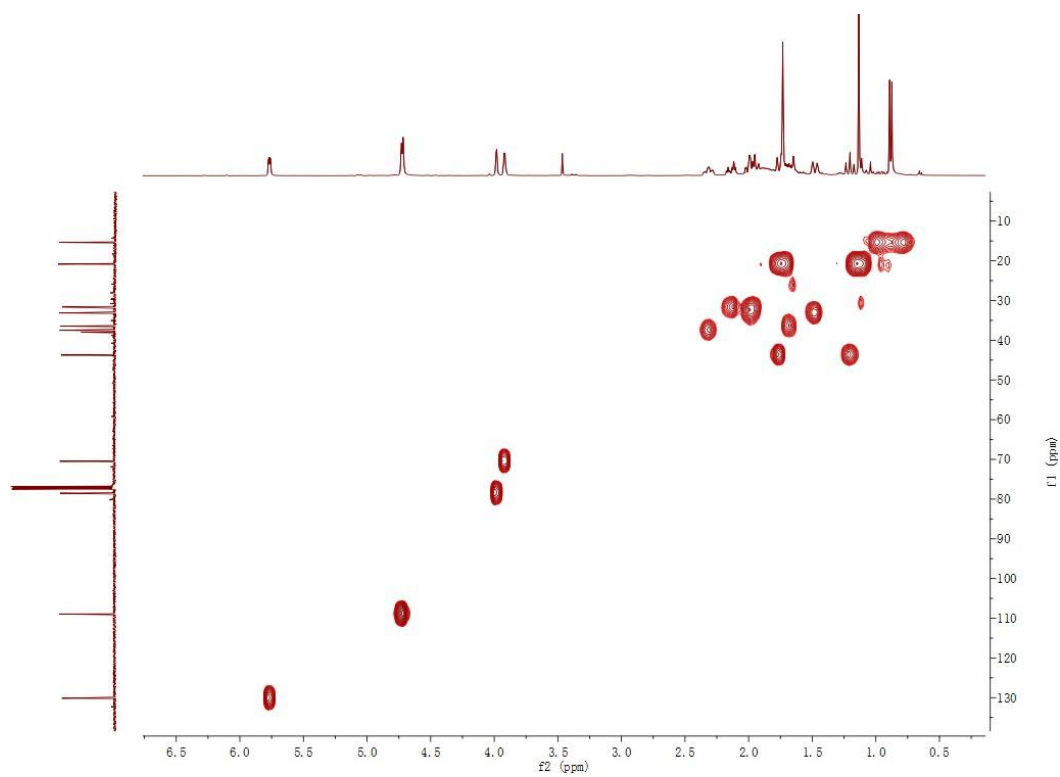

**Fig. S55 HSQC spectrum of compound 6**



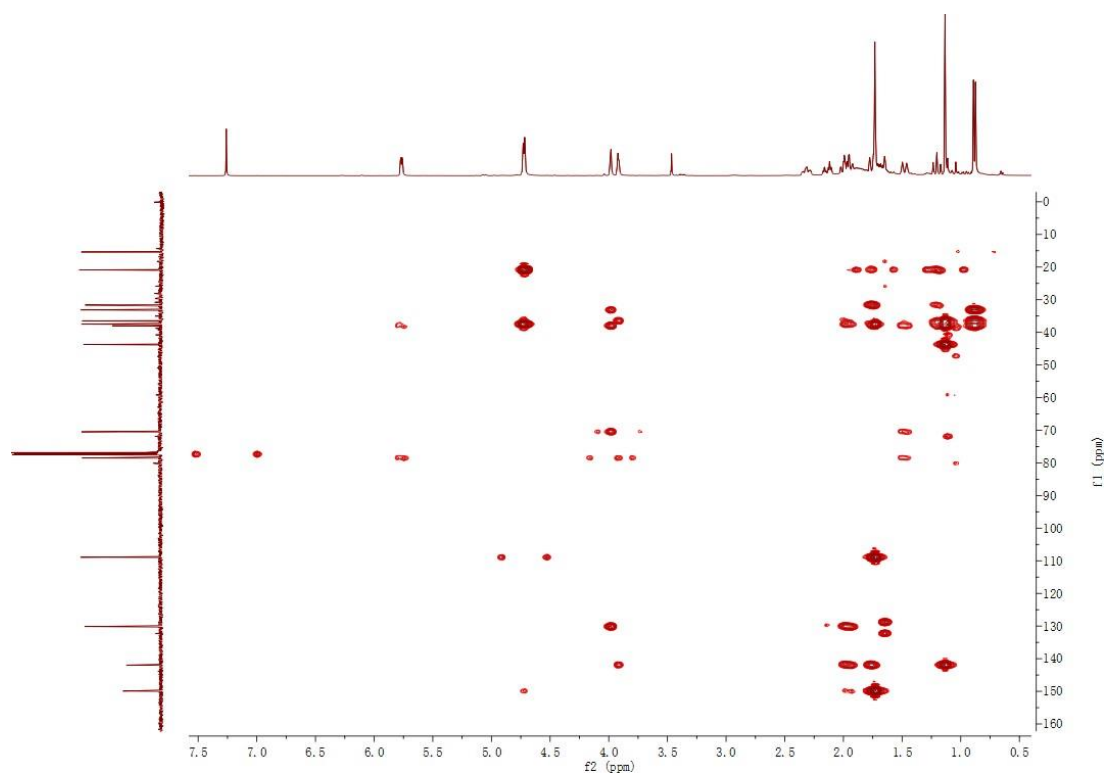

**Fig. S56** HMBC spectrum of compound **6**

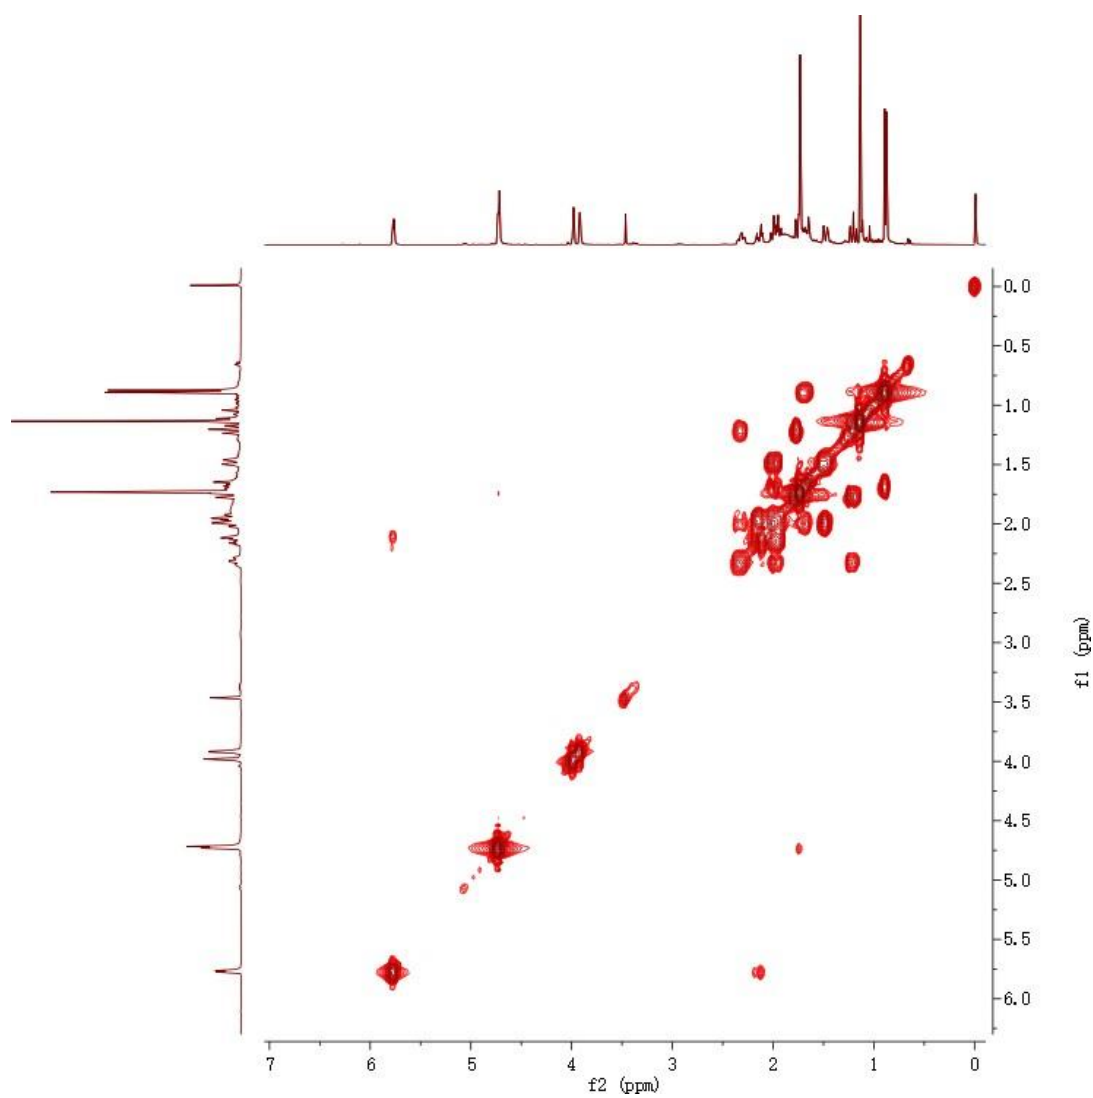

**Fig. S57**  $^1\text{H}$ - $^1\text{H}$  COSY spectrum of compound **6**

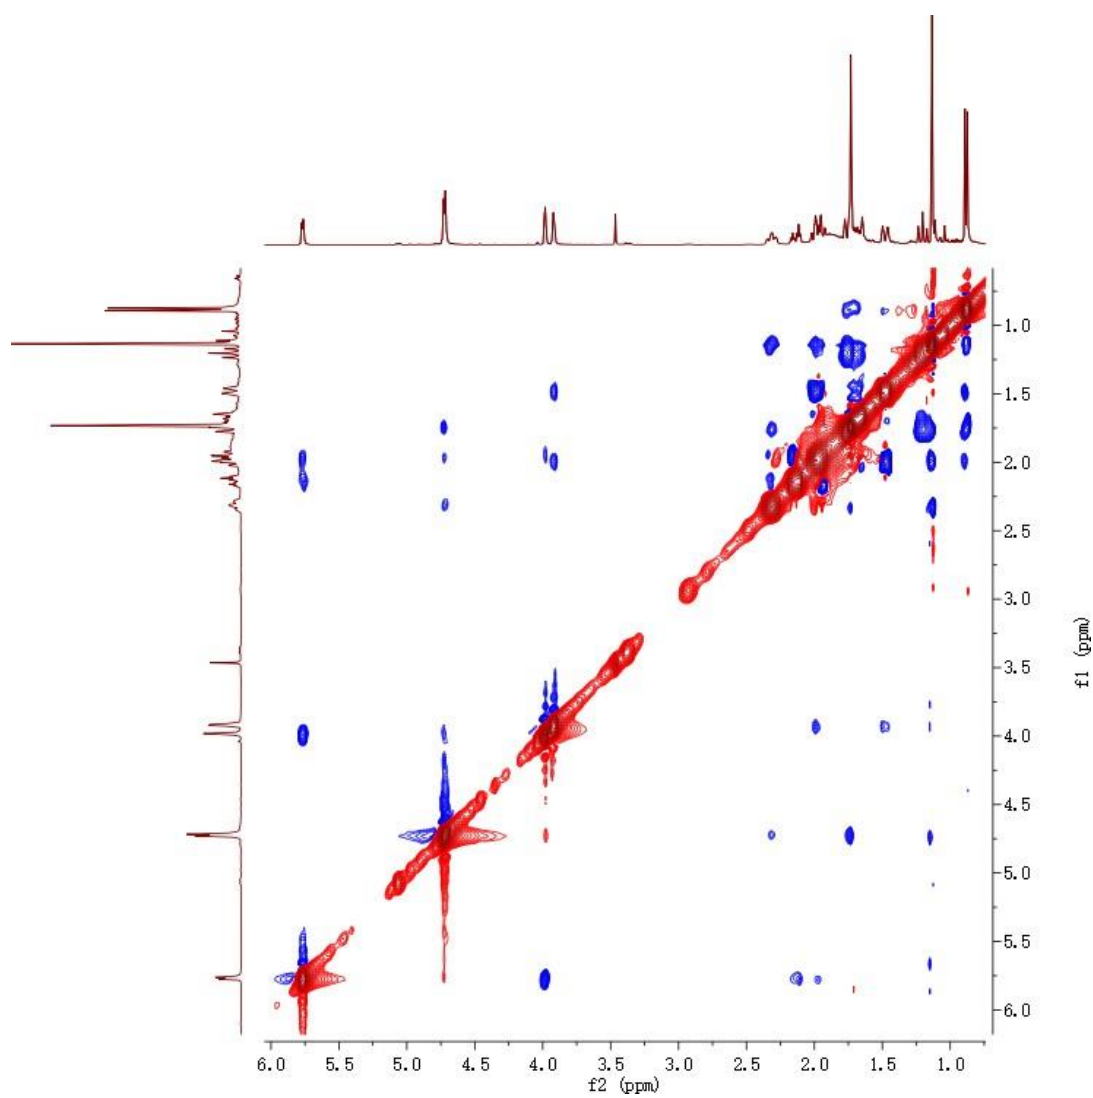

**Fig. S58** NOESY spectrum of compound **6**

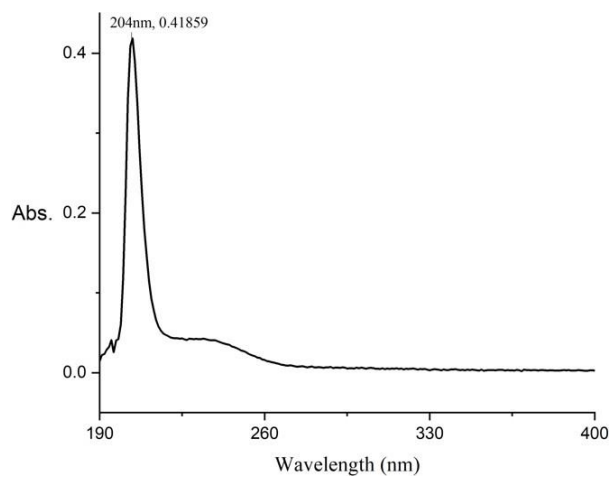

**Fig. S59 UV spectrum of compound 6**

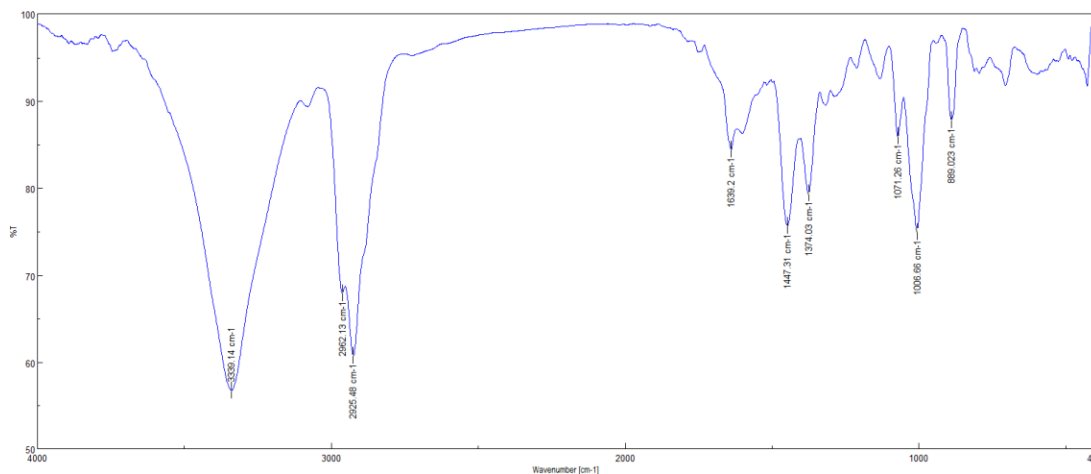

**Fig. S60 IR spectrum of compound 6**

**Elemental Composition Report**

Page 1

**Single Mass Analysis**

Tolerance = 5.0 mDa / DBE: min = -1.5, max = 50.0

Element prediction: Off

Number of isotope peaks used for i-FIT = 3

Monoisotopic Mass, Even Electron Ions

39 formula(e) evaluated with 1 results within limits (up to 50 best isotopic matches for each mass)

Elements Used:

C: 0-100 H: 0-200 O: 0-200

A04E6H1

20220523065 184 (1.489)

1: TOF MS ES+  
3.69e+005

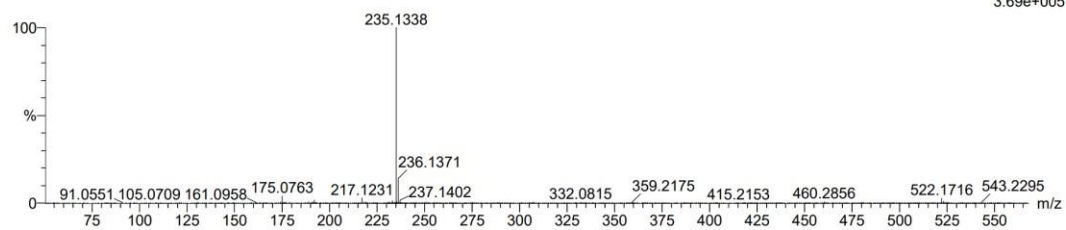

Minimum: -1.5  
Maximum: 5.0 10.0 50.0

| Mass     | Calc. Mass | mDa | PPM | DBE | i-FIT | Norm | Conf (%) | Formula    |
|----------|------------|-----|-----|-----|-------|------|----------|------------|
| 235.1338 | 235.1334   | 0.4 | 1.7 | 5.5 | 515.9 | n/a  | n/a      | C14 H19 O3 |

**Fig. S61 HR-ESI-MS spectrum of compound 23**

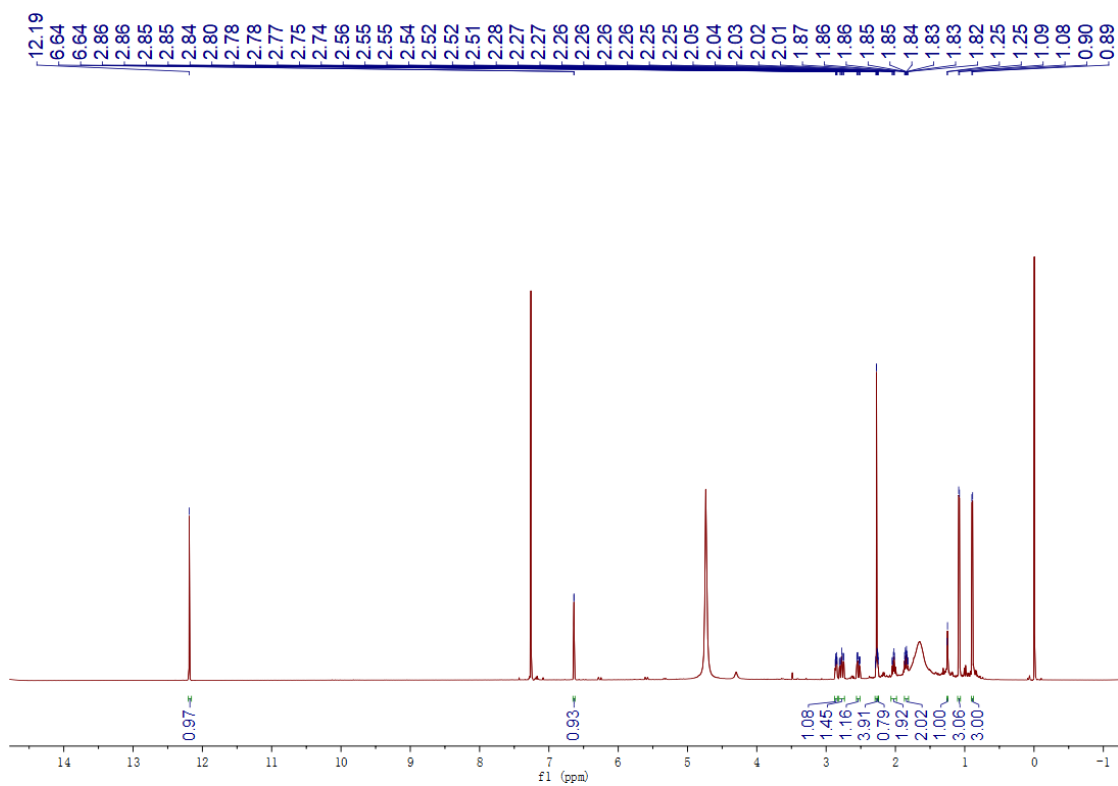

Fig. S62  $^1\text{H}$  NMR (600 MHz,  $\text{CDCl}_3$ ) spectrum of compound 23

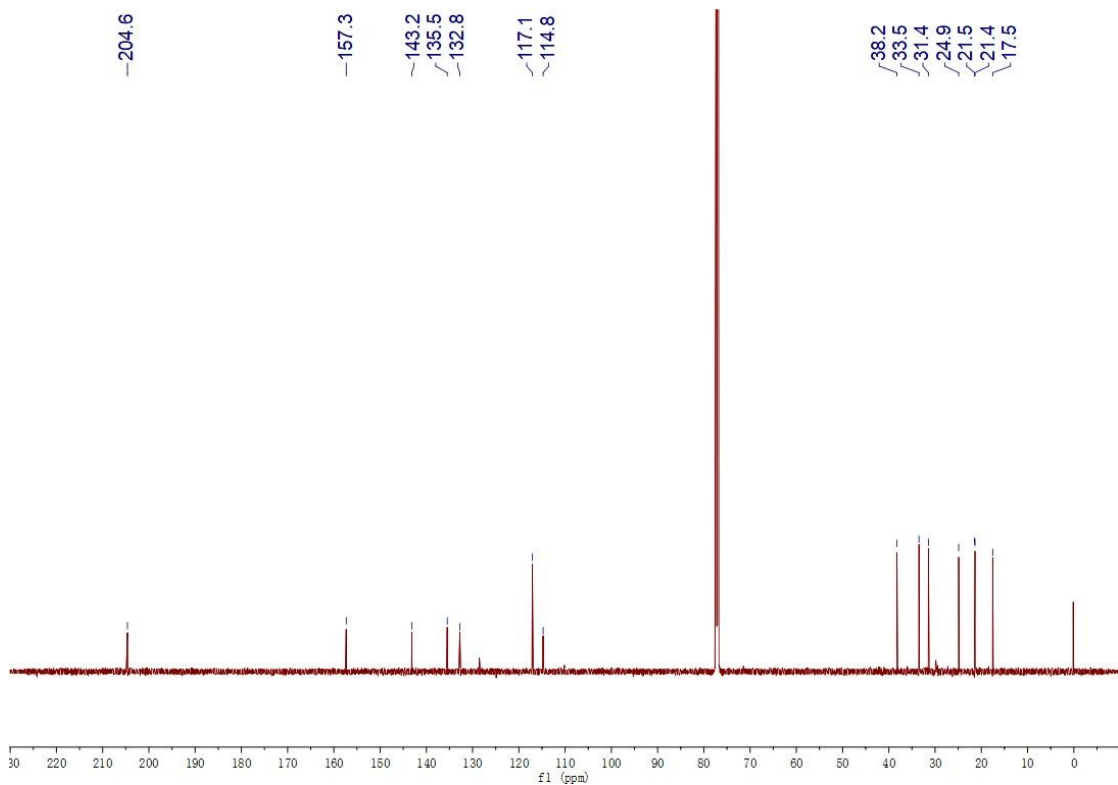

Fig. S63  $^{13}\text{C}$  NMR (150 MHz,  $\text{CDCl}_3$ ) spectrum of compound 23

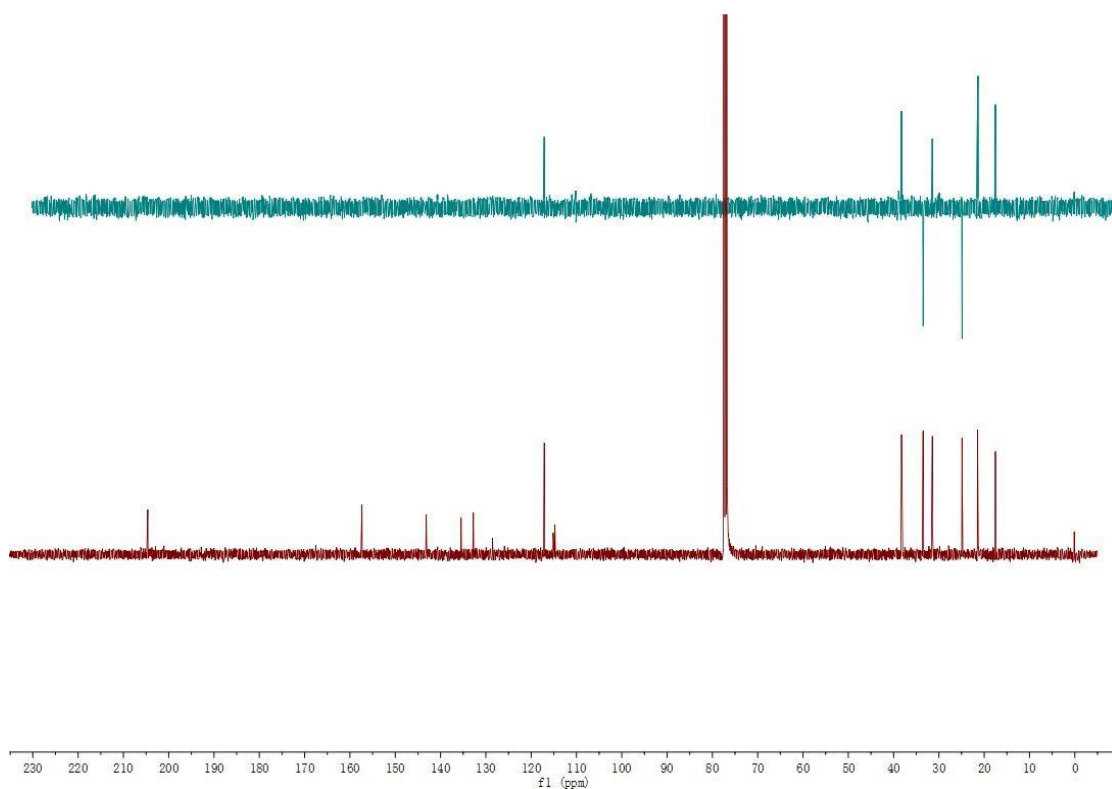

**Fig. S64** DEPT (150 MHz, CDCl<sub>3</sub>) and <sup>13</sup>C NMR spectra of compound 23

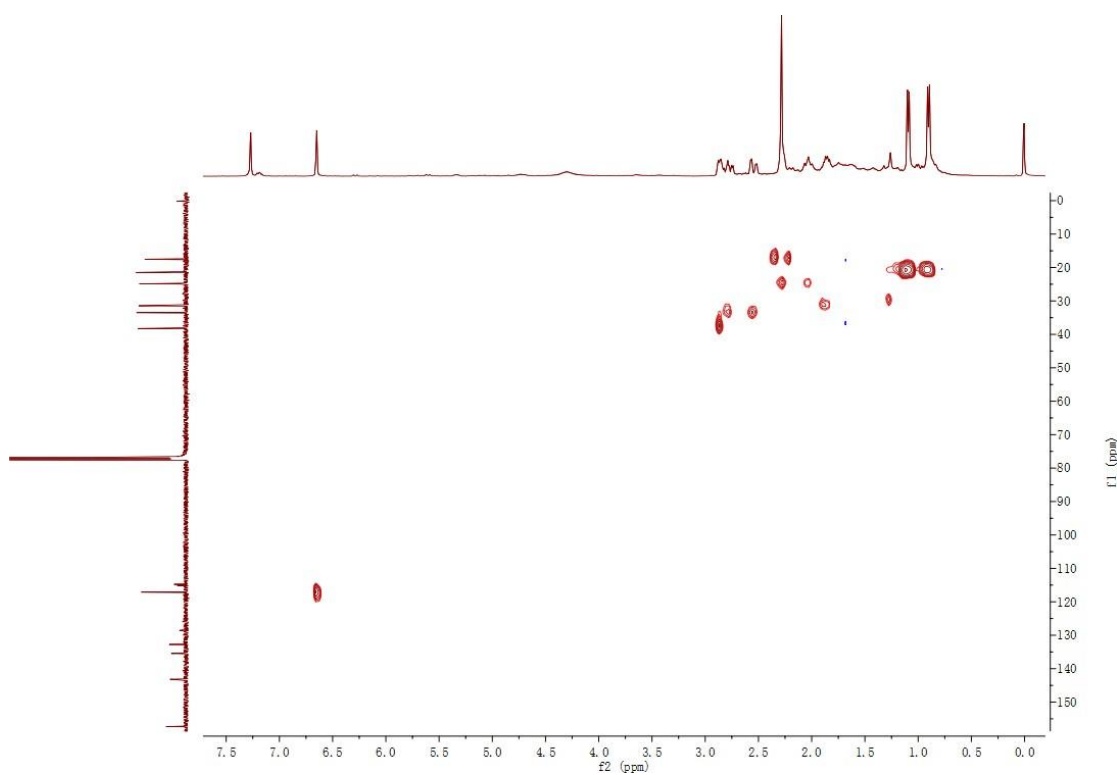

**Fig. S65** HSQC spectrum of compound 23

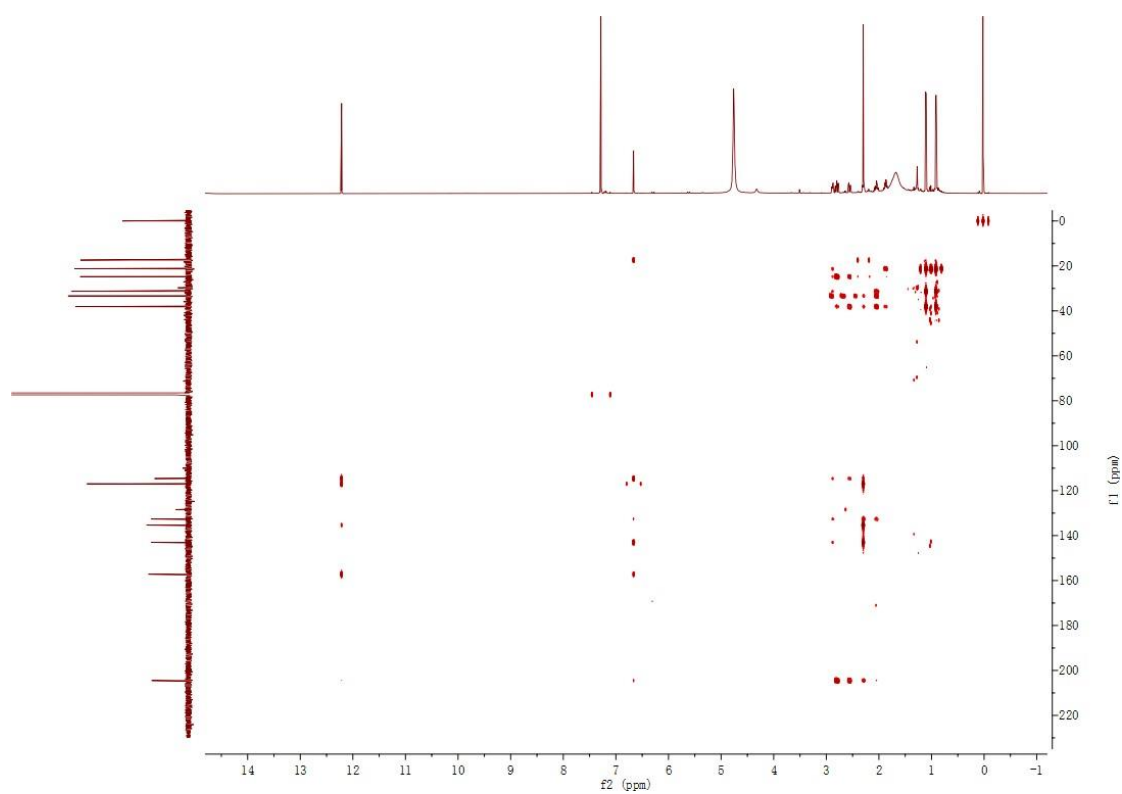

**Fig. S66** HMBC spectrum of compound **23**

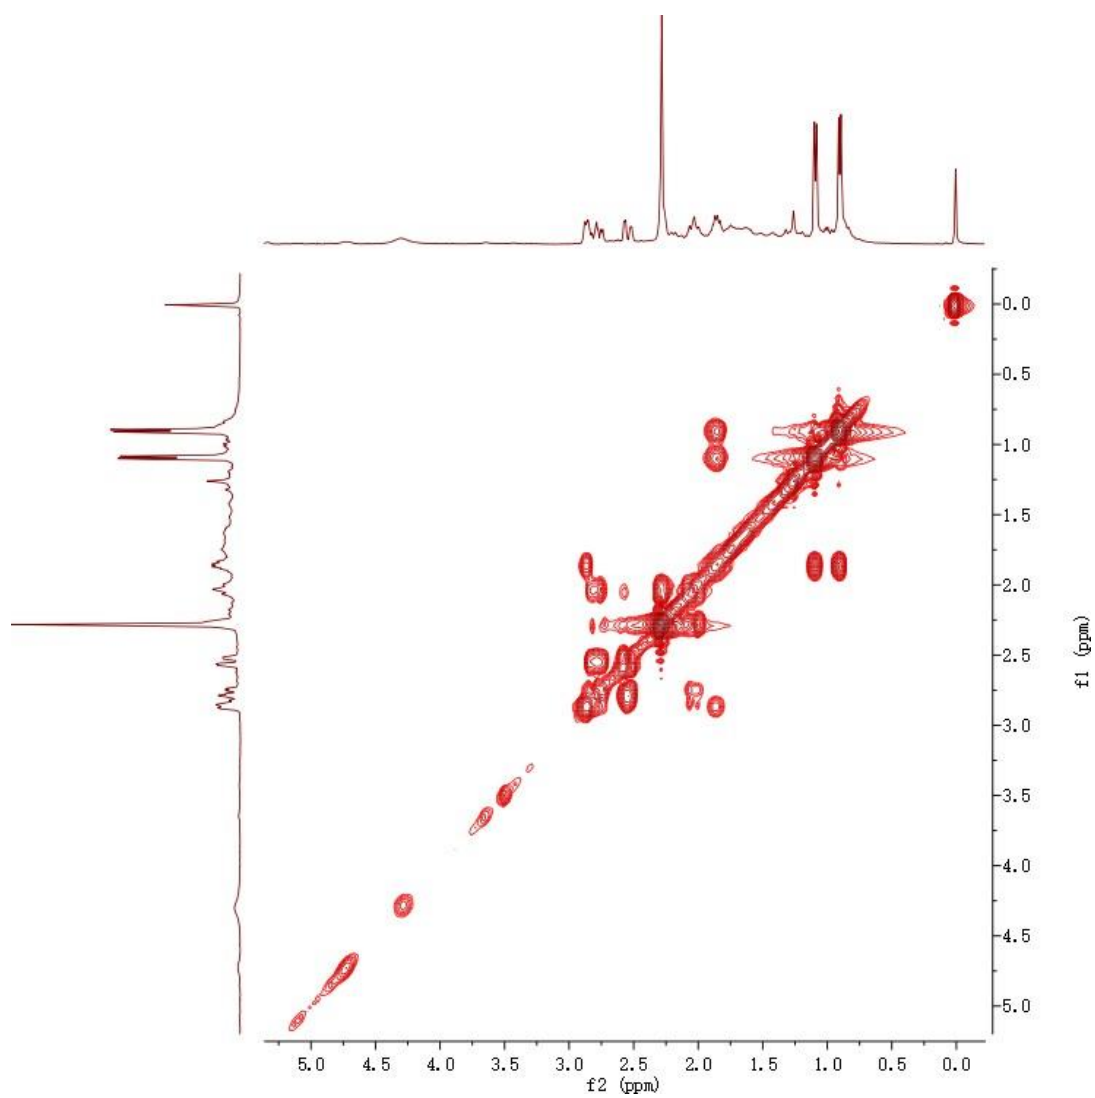

**Fig. S67**  $^1\text{H}$ - $^1\text{H}$  COSY spectrum of compound **23**

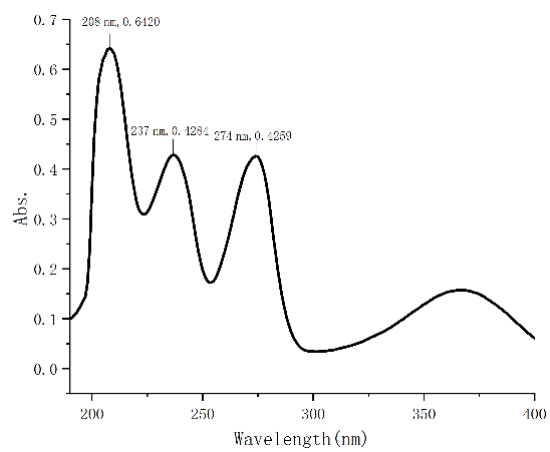



**Fig. S68 UV spectrum of compound 23**

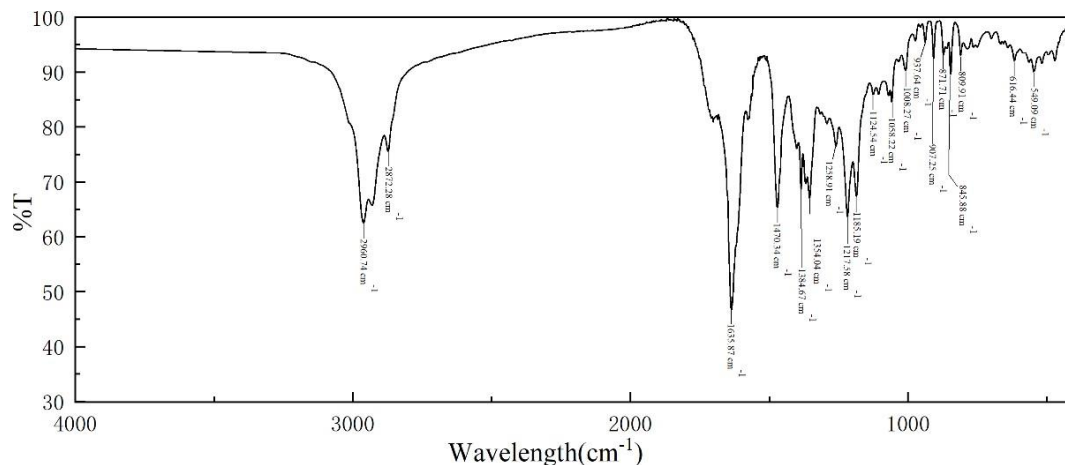

**Fig. S69 IR spectrum of compound 23**

**Elemental Composition Report**

**Single Mass Analysis**

Tolerance = 5.0 mDa / DBE: min = -1.5, max = 50.0

Element prediction: Off

Number of isotope peaks used for i-FIT = 3

Monoisotopic Mass, Even Electron Ions

65 formula(e) evaluated with 2 results within limits (up to 50 best isotopic matches for each mass)

Elements Used:

C: 0-500 H: 0-1000 O: 0-200 Na: 0-1

AO3D2A3A

20210118006 131 (1.070)

1: TOF MS ES+  
8.88e+002

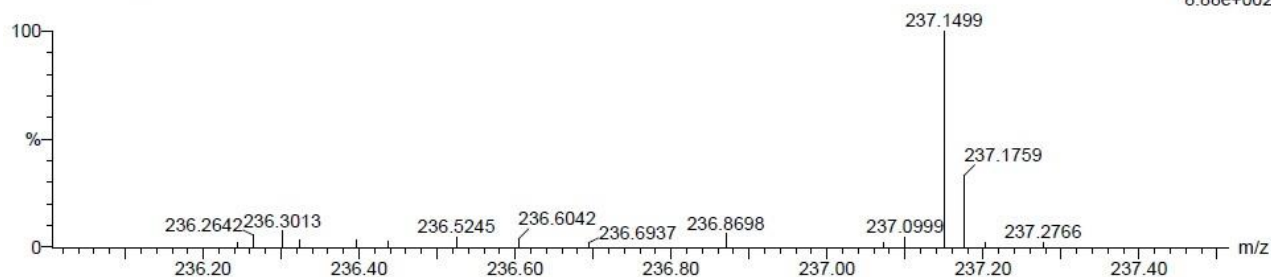

Minimum: -1.5  
Maximum: 5.0 10.0 50.0

| Mass     | Calc. Mass | mDa | PPM | DBE | i-FIT | Formula    |
|----------|------------|-----|-----|-----|-------|------------|
| 237.1499 | 237.1491   | 0.8 | 3.4 | 4.5 | n/a   | C14 H21 O3 |

**Fig. S70 HR-ESI-MS spectrum of compound 24**

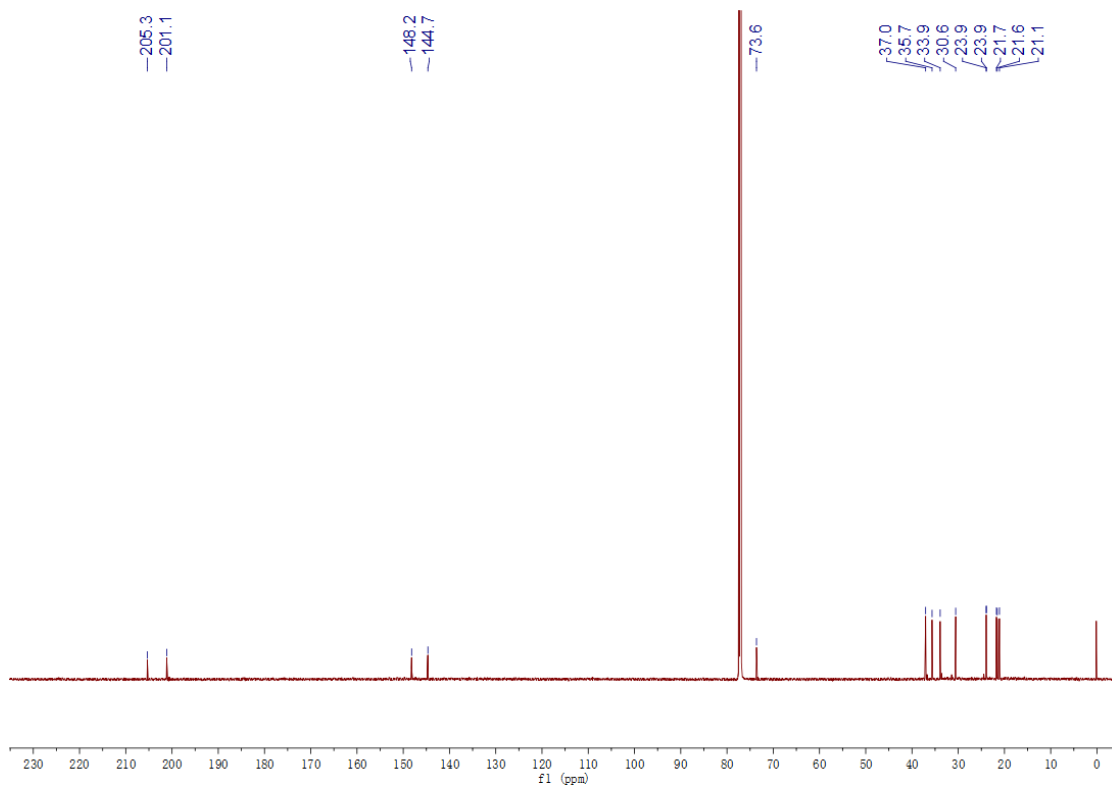

**Fig. S71  $^1\text{H}$  NMR (600 MHz,  $\text{CDCl}_3$ ) spectrum of compound 24**

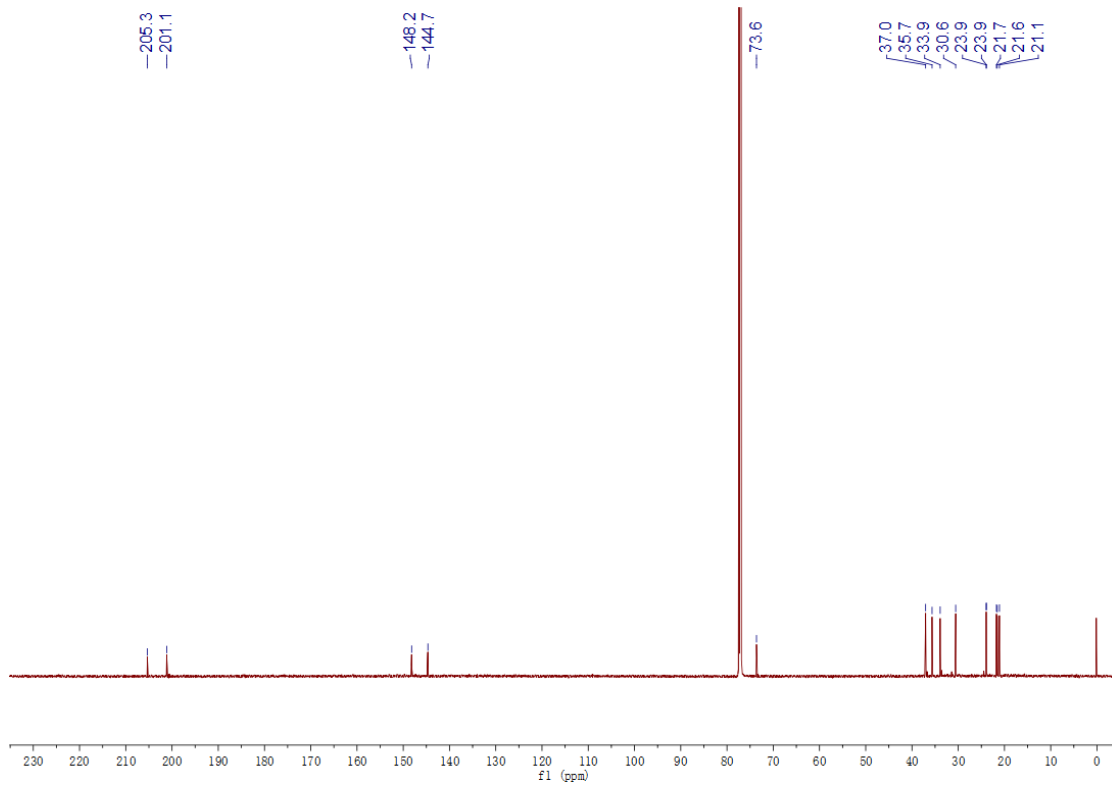

**Fig. S72  $^{13}\text{C}$  NMR (150 MHz,  $\text{CDCl}_3$ ) spectrum of compound 24**

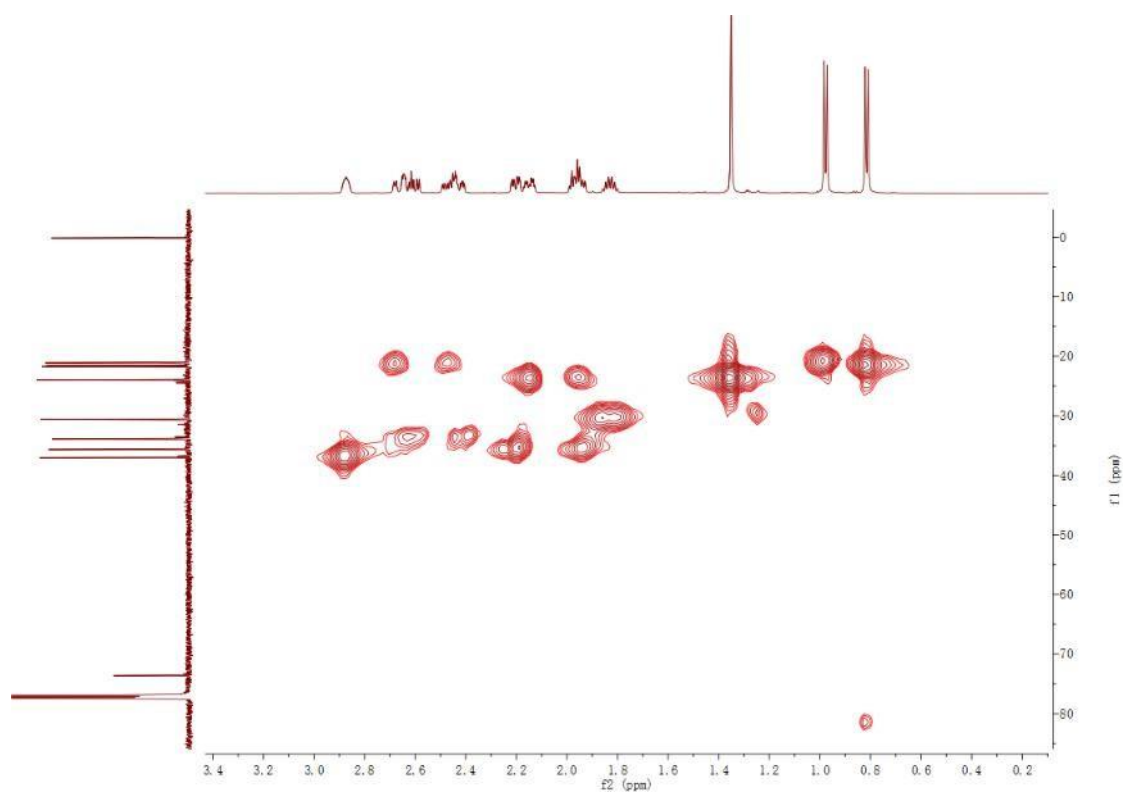

**Fig. S73** HSQC spectrum of compound 24

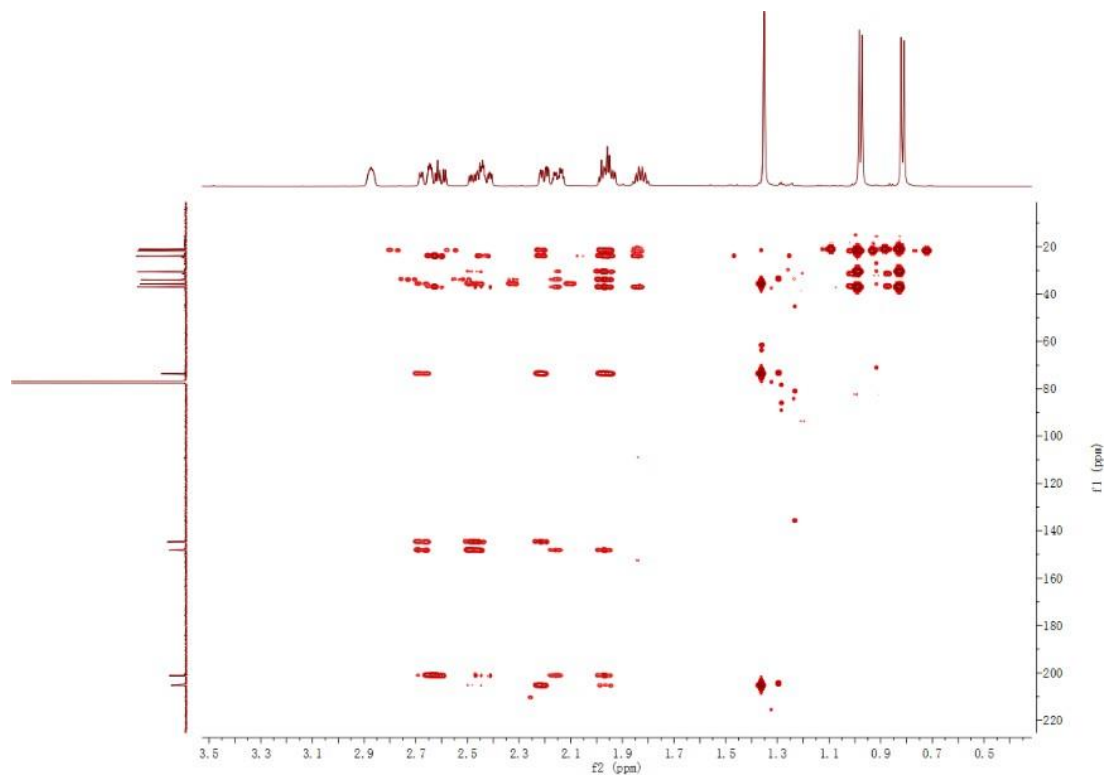

**Fig. S74** HMBC spectrum of compound 24

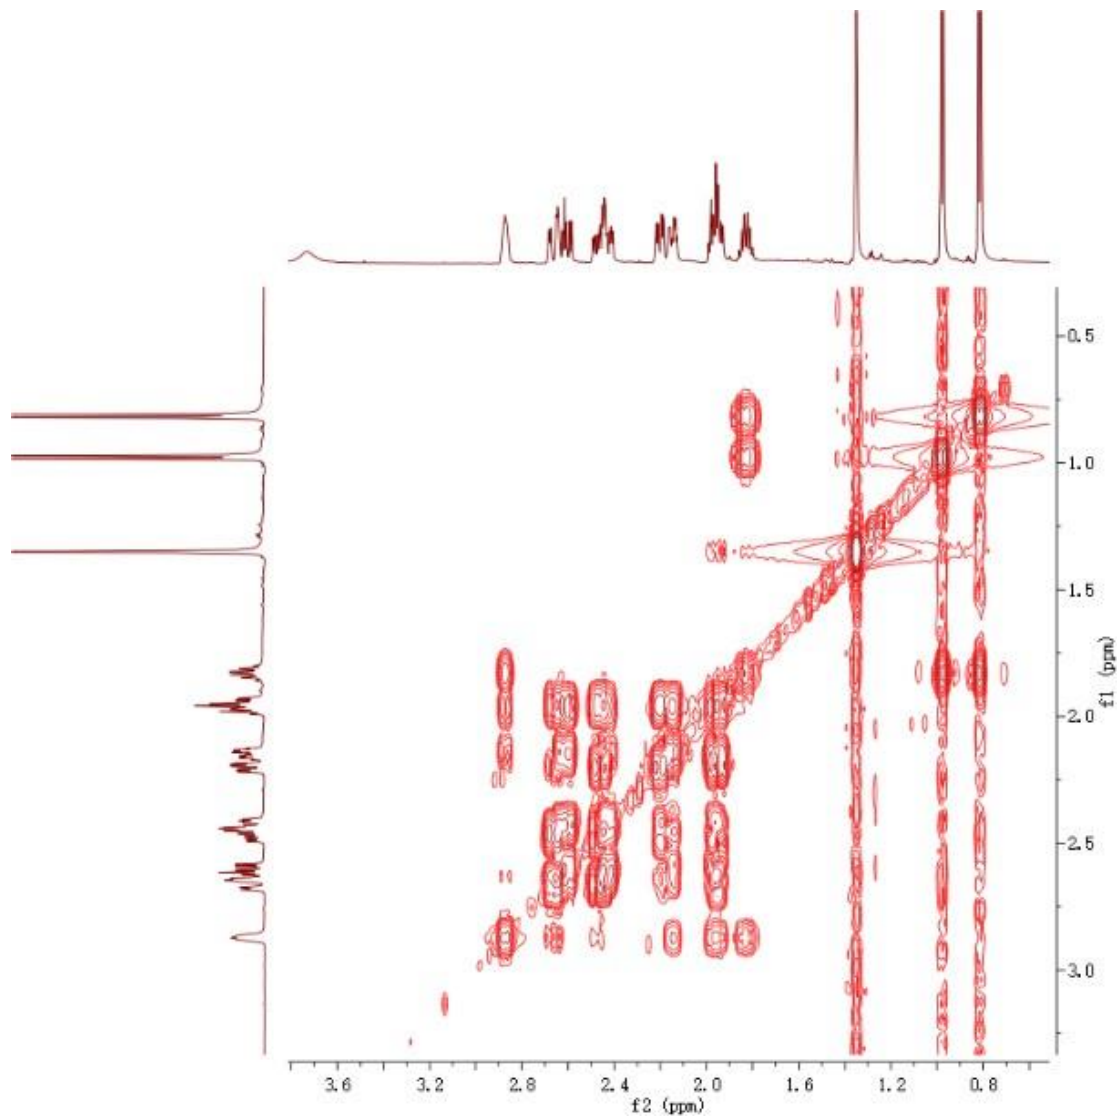

**Fig. S75**  $^1\text{H}$ - $^1\text{H}$  COSY spectrum of compound 24

**Fig. S76 NOESY spectrum of compound 24**

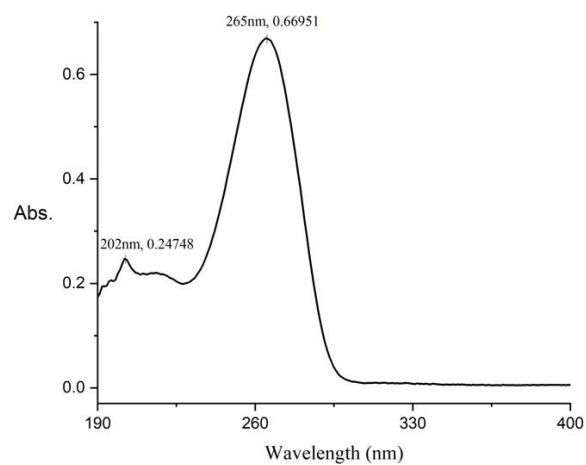

**Fig. S77 IR spectrum of compound 24**

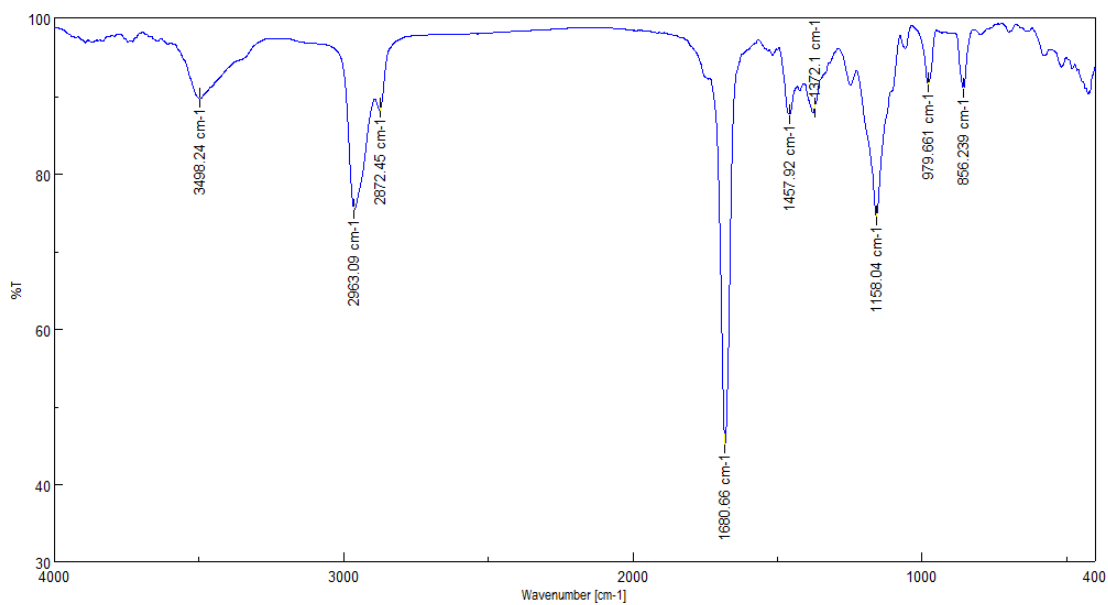

**Fig. S78 IR spectrum of compound 24**

Single Mass Analysis

Tolerance = 5.0 mDa / DBE: min = -1.5, max = 50.0

Element prediction: Off

Number of isotope peaks used for i-FIT = 3

Monoisotopic Mass, Even Electron Ions

65 formula(e) evaluated with 2 results within limits (up to 50 best isotopic matches for each mass)

Elements Used:

C: 0-100 H: 0-200 O: 0-200 Na: 0-1

AO4E4A3

2022030732 178 (1.444)

1: TOF MS ES+  
1.76e+005

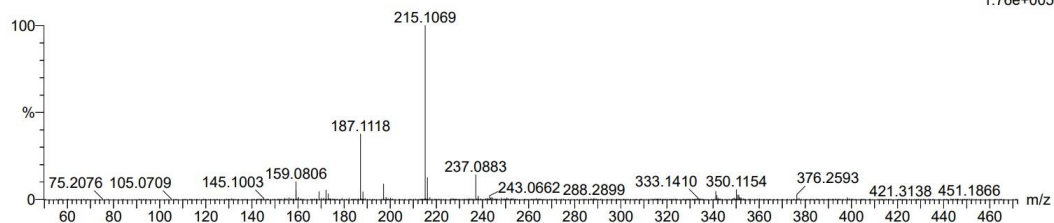

Minimum:

Maximum: 5.0 10.0 -1.5

| Mass     | Calc. Mass | mDa  | PPM   | DBE  | i-FIT | Norm  | Conf (%) | Formula       |
|----------|------------|------|-------|------|-------|-------|----------|---------------|
| 237.0883 | 237.0891   | -0.8 | -3.4  | 7.5  | 156.7 | 0.028 | 97.27    | C14 H14 O2 Na |
|          | 237.0916   | -3.3 | -13.9 | 10.5 | 160.2 | 3.602 | 2.73     | C16 H13 O2    |

Fig. S79 HR-ESI-MS spectrum of compound 25

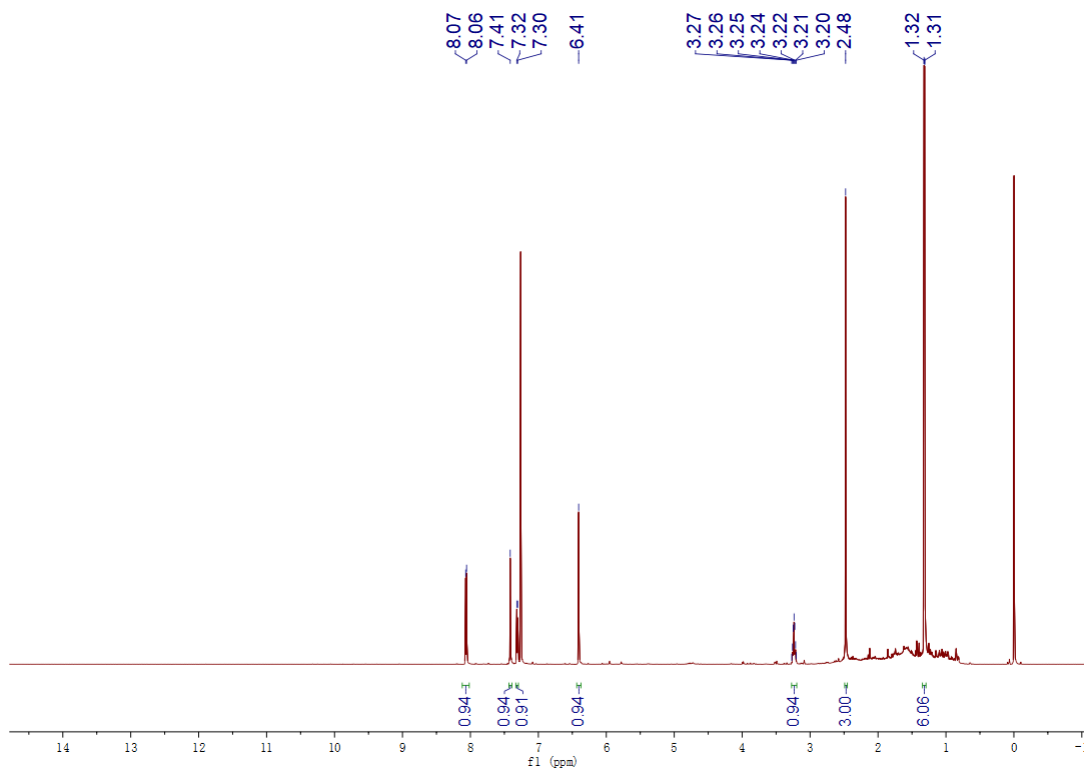

Fig. S80  $^1\text{H}$  NMR (600 MHz,  $\text{CDCl}_3$ ) spectrum of compound 25

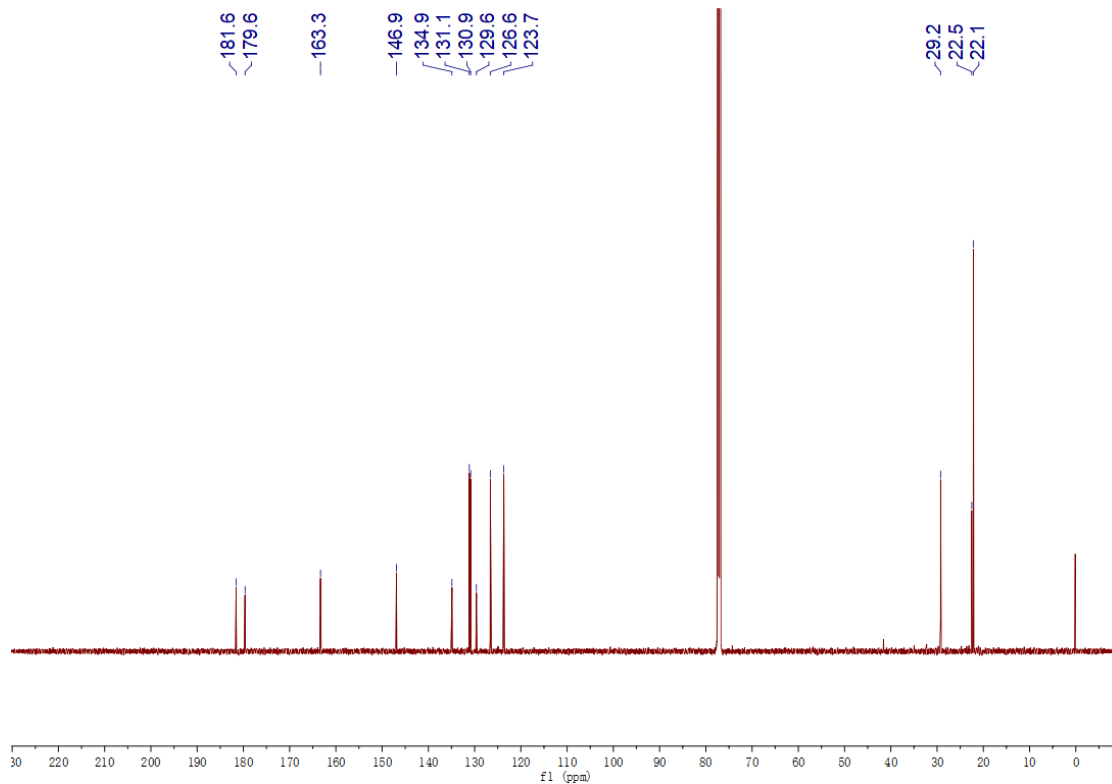

Fig. S81  $^{13}\text{C}$  NMR (150 MHz,  $\text{CDCl}_3$ ) spectrum of compound 25

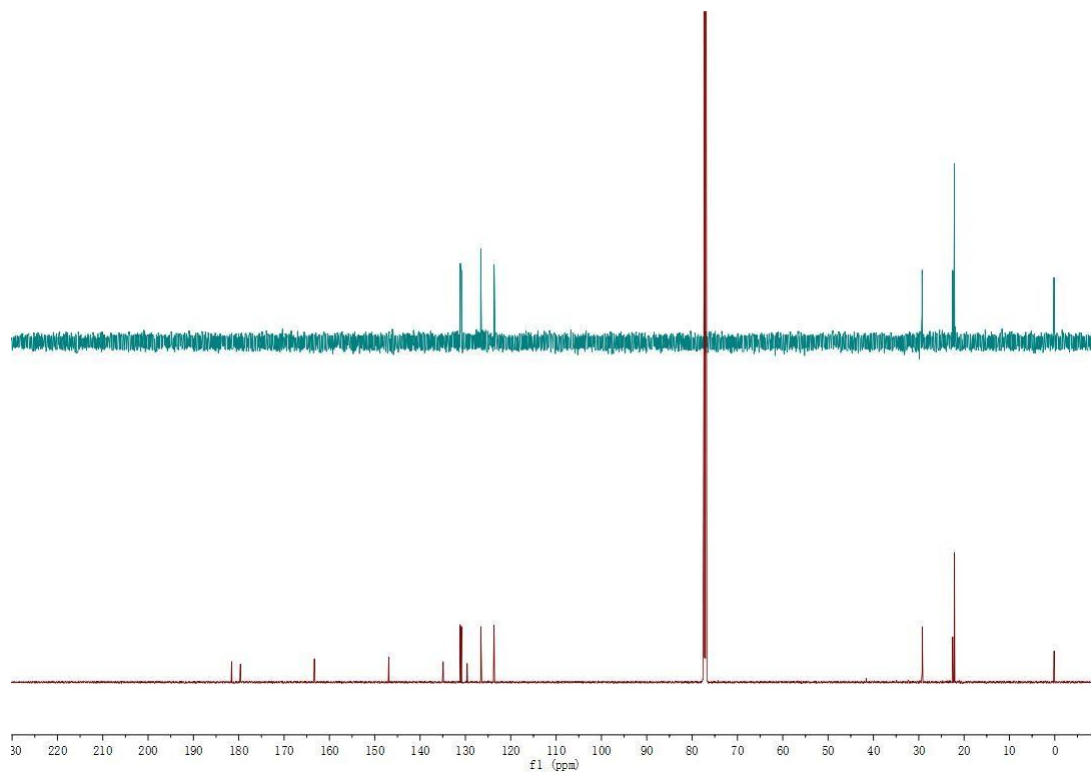

**Fig. S82 DEPT (150 MHz, CDCl<sub>3</sub>) and <sup>13</sup>C NMR spectra of compound 25**

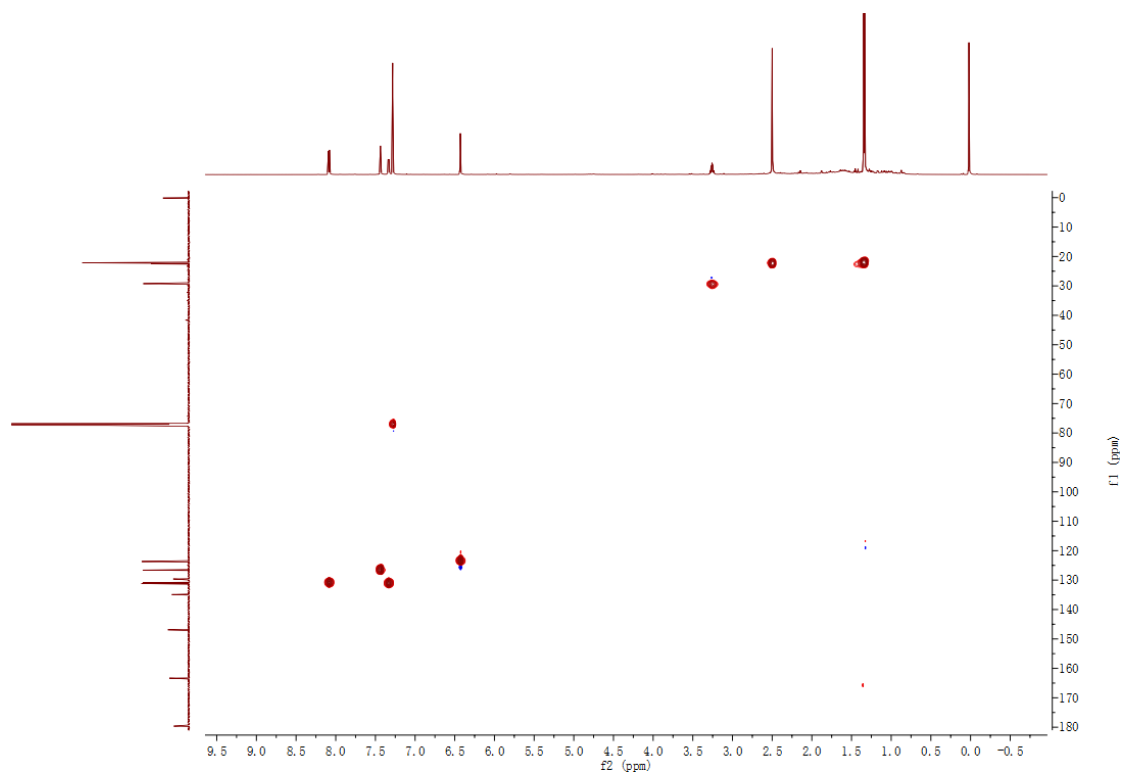

**Fig. S83 HSQC spectrum of compound 25**

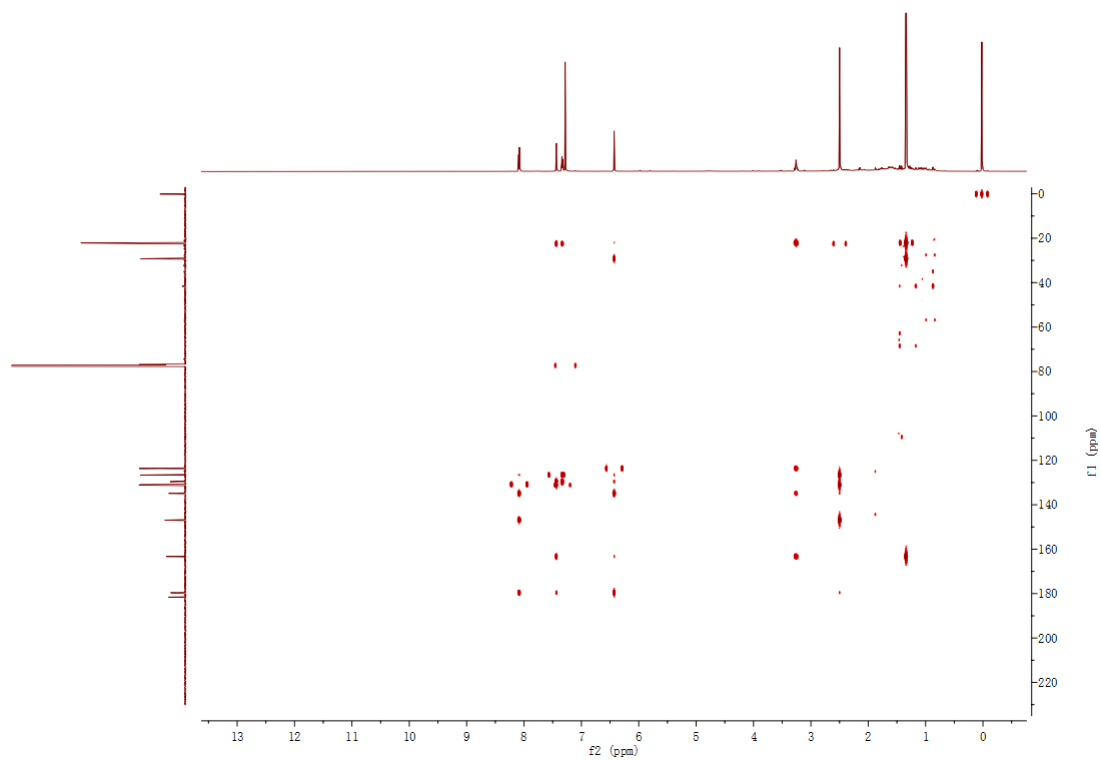



**Fig. S84 HMBC spectrum of compound 25**

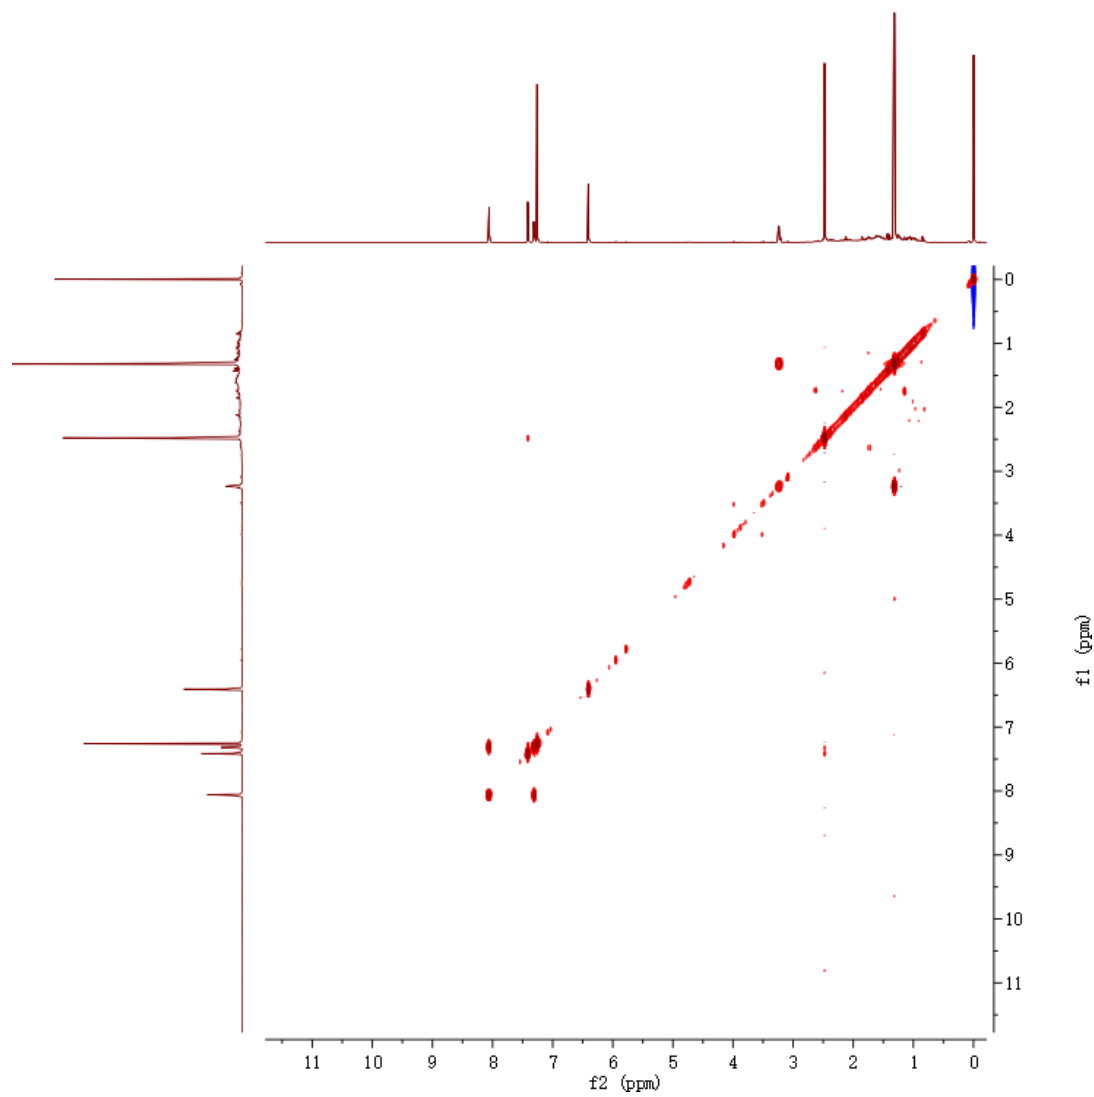

**Fig. S85  $^1\text{H}$ - $^1\text{H}$  COSY spectrum of compound 25**

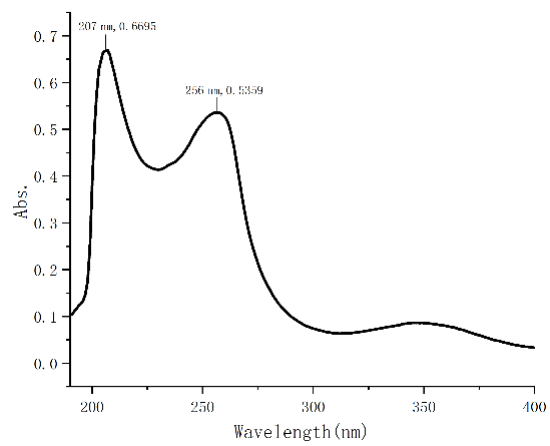

**Fig. S86 UV spectrum of compound 25**

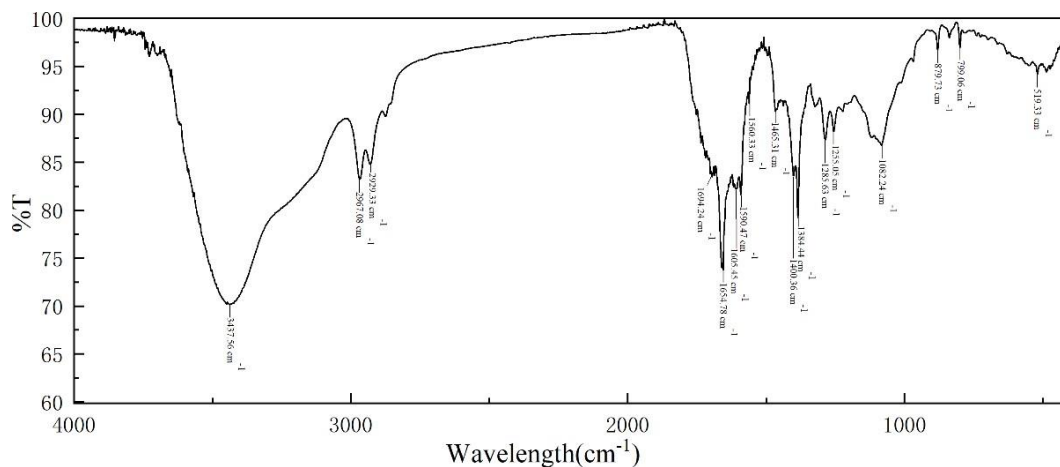

**Fig. S87 IR spectrum of compound 25**

**Elemental Composition Report**

**Single Mass Analysis**

Tolerance = 10.0 PPM / DBE: min = -1.5, max = 50.0

Element prediction: Off

Number of isotope peaks used for i-FIT = 3

Monoisotopic Mass, Even Electron Ions

1300 formula(e) evaluated with 4 results within limits (up to 50 best isotopic matches for each mass)

Elements Used:

C: 0-500 H: 0-1000 N: 0-200 O: 0-200 Na: 0-1 Cl: 0-8

AO3D2C2

20210118009 146 (1.182)

1: TOF MS ES+  
4.91e+00

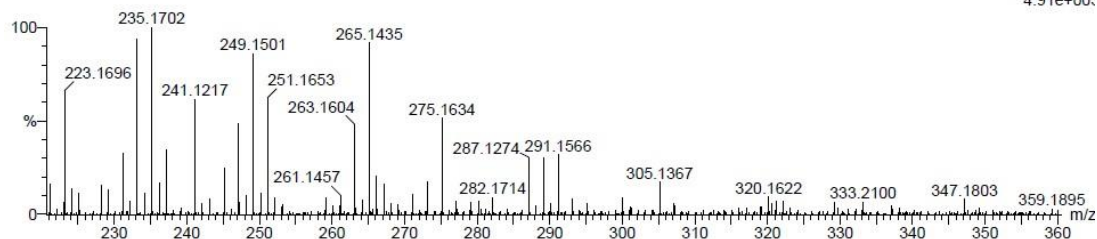

Minimum: -1.5  
Maximum: 5.0 10.0 50.0

| Mass     | Calc. Mass | mDa  | PPM  | DBE | i-FIT  | Formula                                        |
|----------|------------|------|------|-----|--------|------------------------------------------------|
| 233.1541 | 233.1542   | -0.1 | -0.4 | 5.5 | 2440.8 | C <sub>15</sub> H <sub>21</sub> O <sub>2</sub> |

**Fig. S88 HR-ESI-MS spectrum of compound 27**

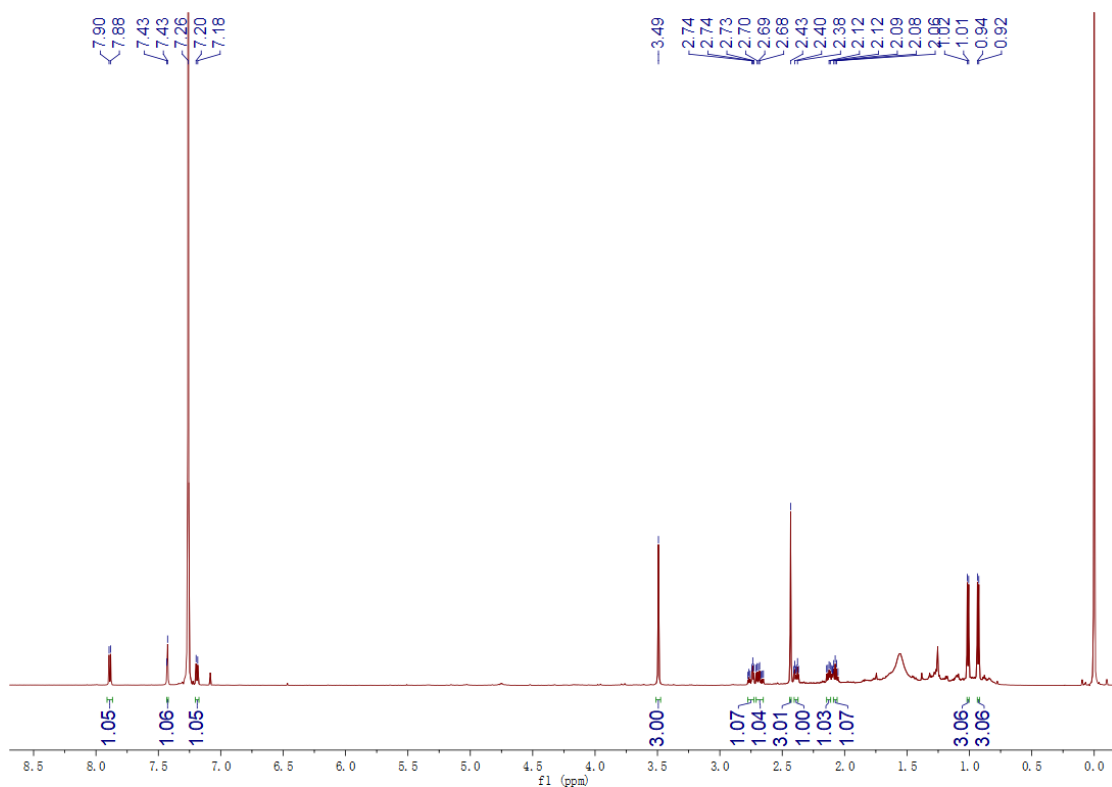

**Fig. S89**  $^1\text{H}$  NMR (600 MHz,  $\text{CDCl}_3$ ) spectrum of compound 27

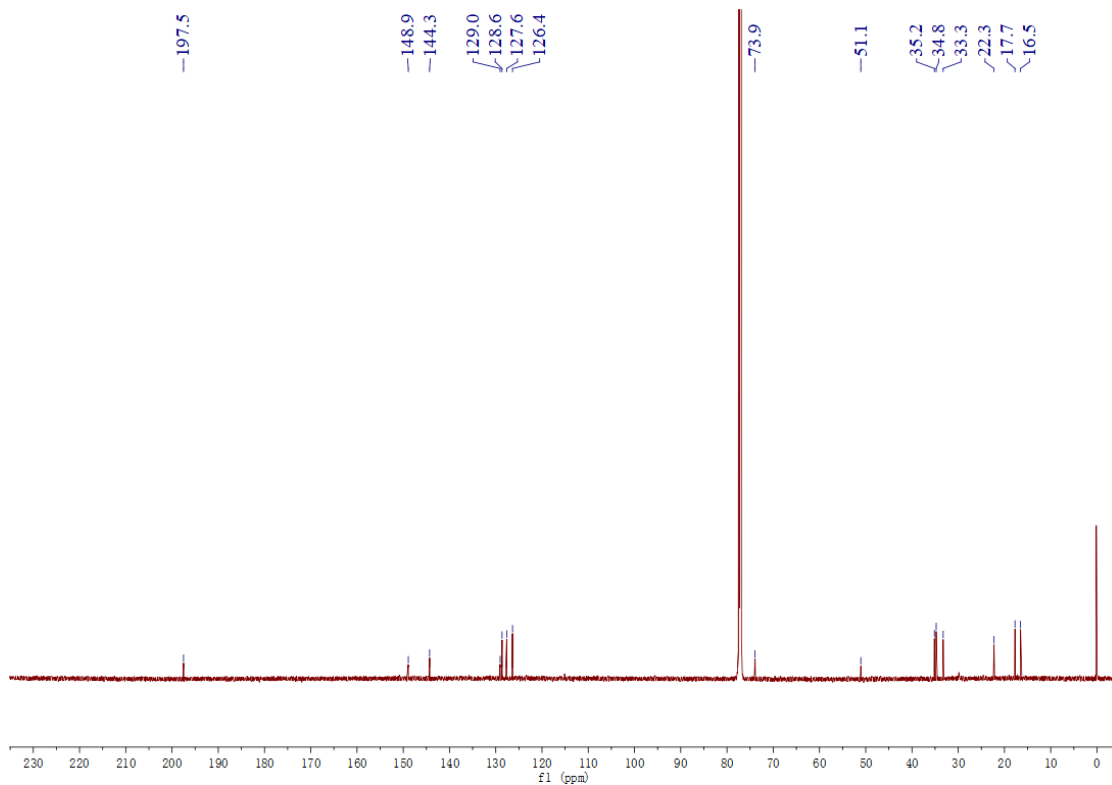

**Fig. S90**  $^{13}\text{C}$  NMR (150 MHz,  $\text{CDCl}_3$ ) spectrum of compound 27

**Fig. S91 DEPT (150 MHz, CDCl<sub>3</sub>) and <sup>13</sup>C NMR spectra of compound 27**

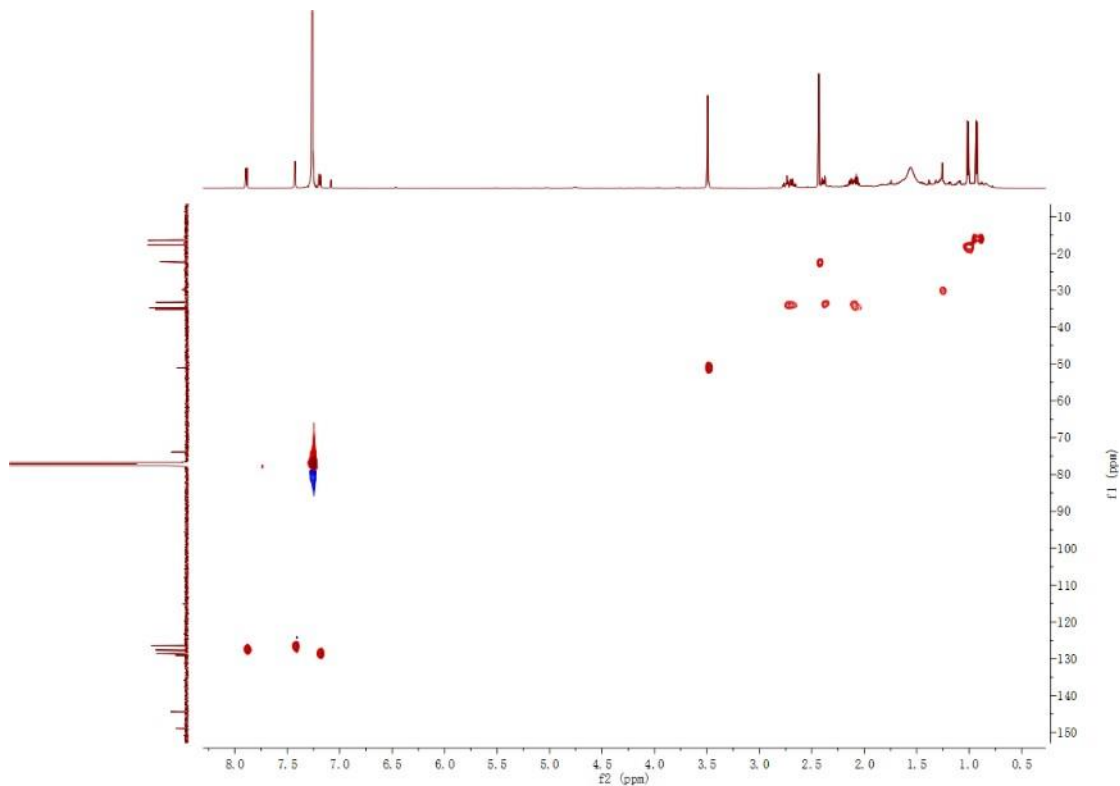

**Fig. S92 HSQC spectrum of compound 27**

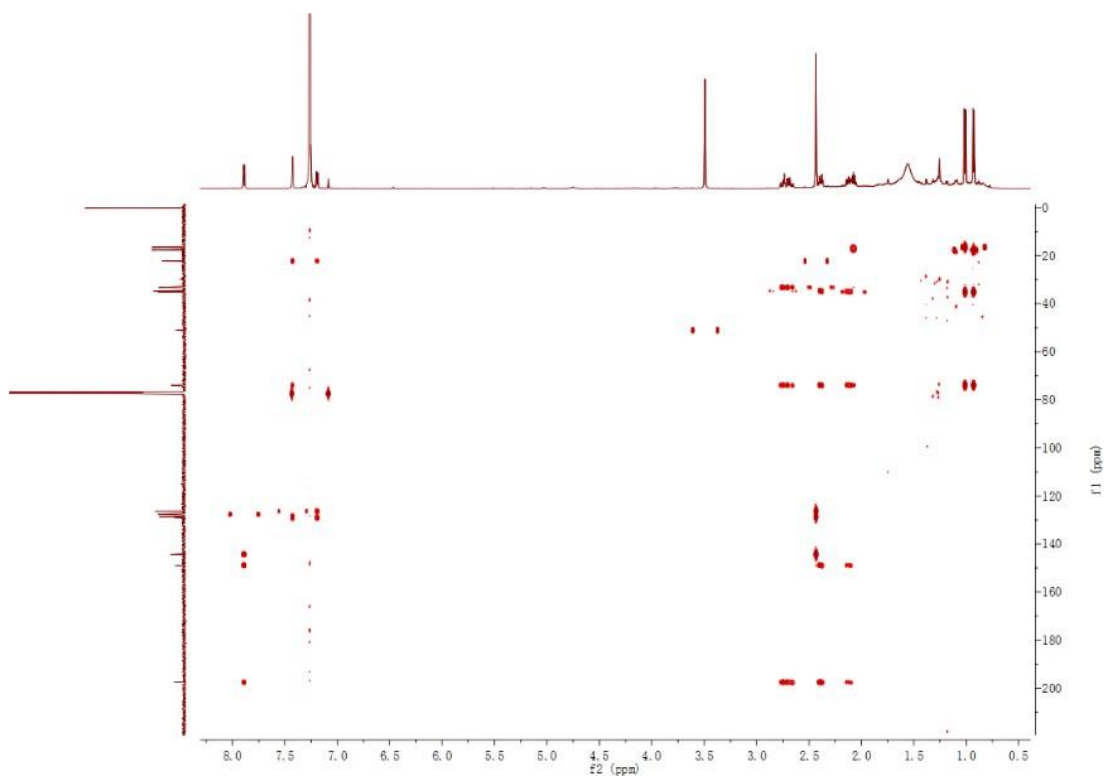

**Fig. S93** HMBC spectrum of compound 27

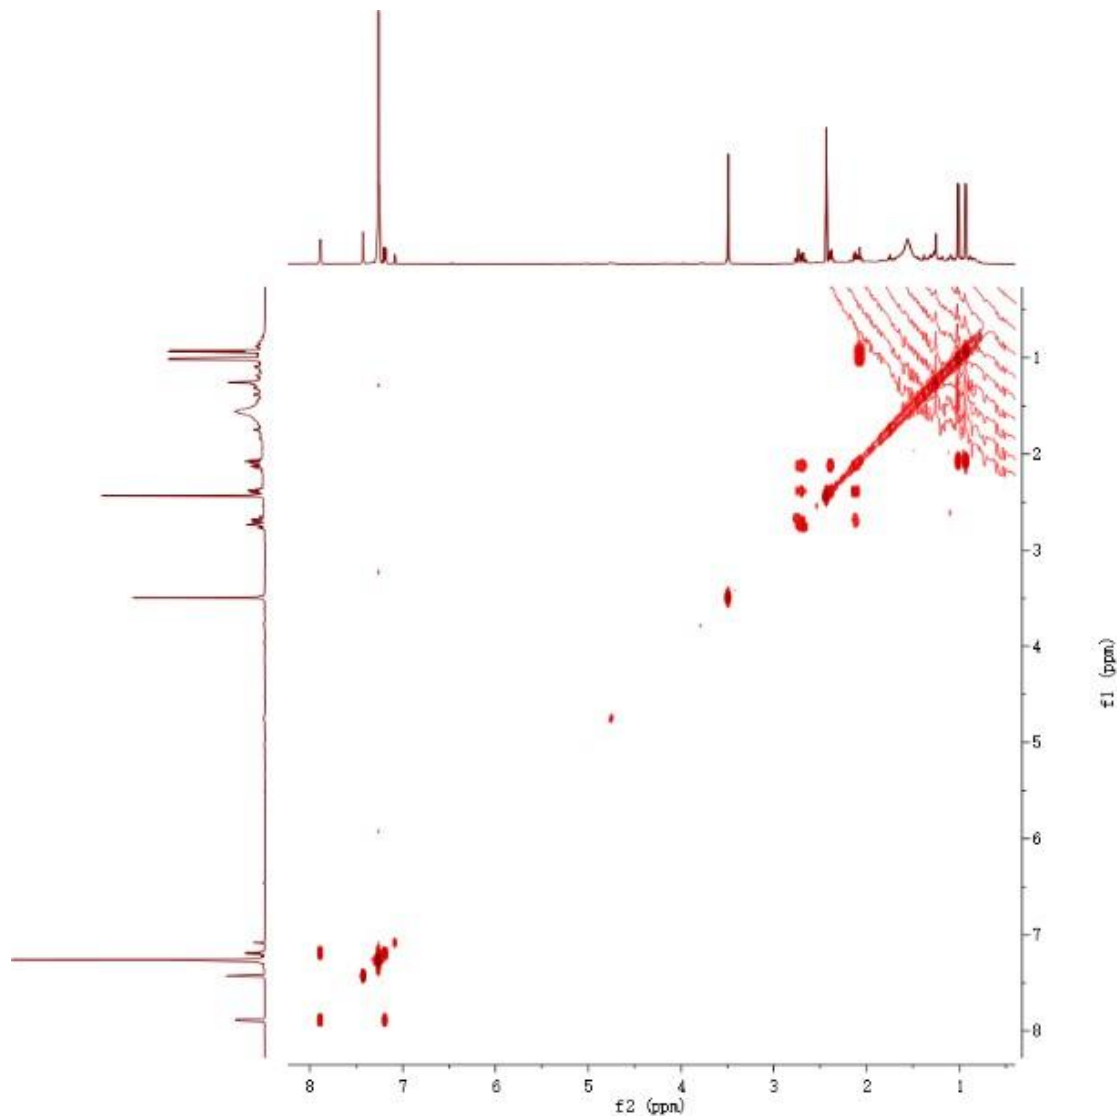

**Fig. S94**  $^1\text{H}$ - $^1\text{H}$  COSY spectrum of compound 27

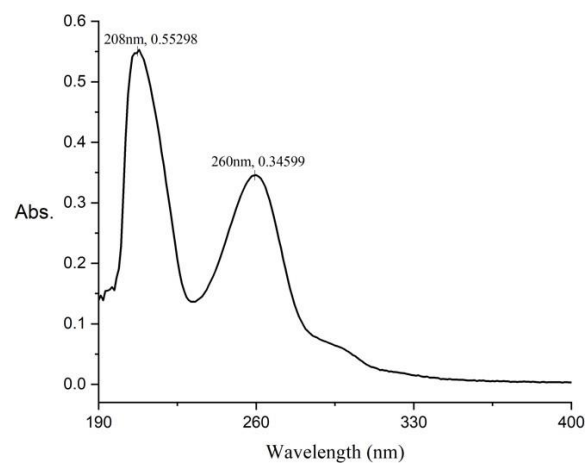

**Fig. S95 UV spectrum of compound 27**

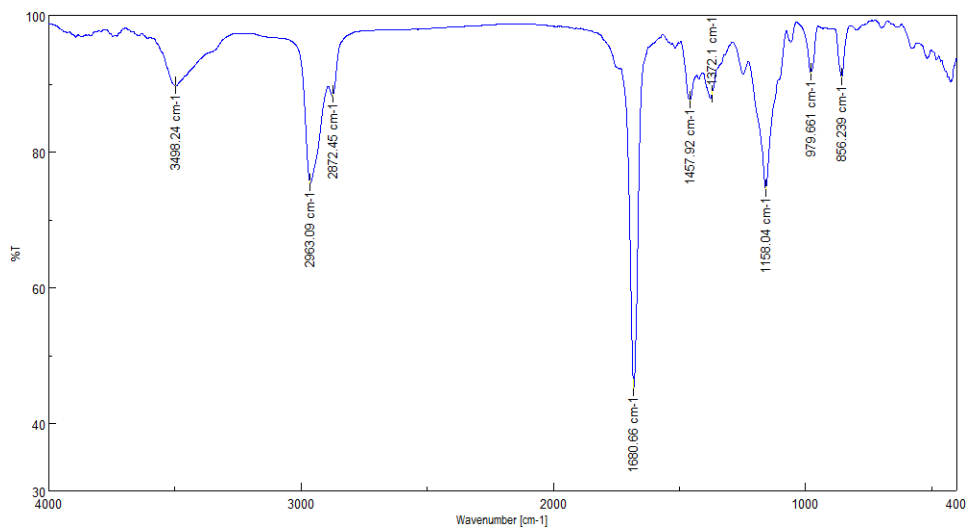

# Fig. S96 IR spectrum of compound 27

## Elemental Composition Report

Page 1

### Single Mass Analysis

Tolerance = 5.0 mDa / DBE: min = -1.5, max = 50.0

Element prediction: Off

Number of isotope peaks used for i-FIT = 3

Monoisotopic Mass, Even Electron Ions

81 formula(e) evaluated with 2 results within limits (up to 50 best isotopic matches for each mass)

Elements Used:

C: 0-500 H: 0-1000 O: 0-200 Na: 0-1

AO3D3G8D2

20210712018 188 (1.519)

1: TOF MS ES+  
4.52e+004

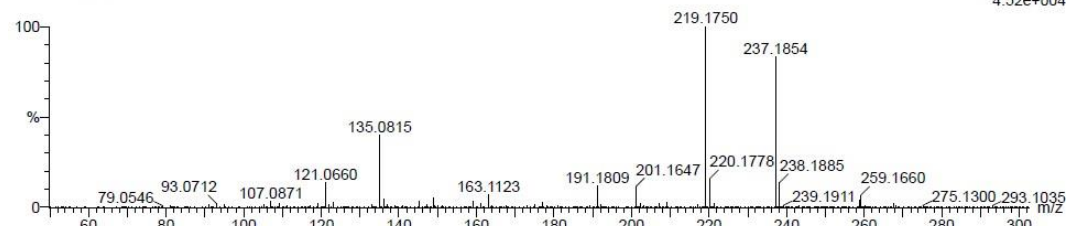

Minimum: -1.5  
Maximum: 5.0 10.0 50.0

| Mass     | Calc. Mass | mDa  | PPM  | DBE | i-FIT | Formula       |
|----------|------------|------|------|-----|-------|---------------|
| 259.1660 | 259.1674   | -1.4 | -5.4 | 3.5 | 63.6  | C15 H24 O2 Na |

# Fig. S97 HR-ESI-MS spectrum of compound 28

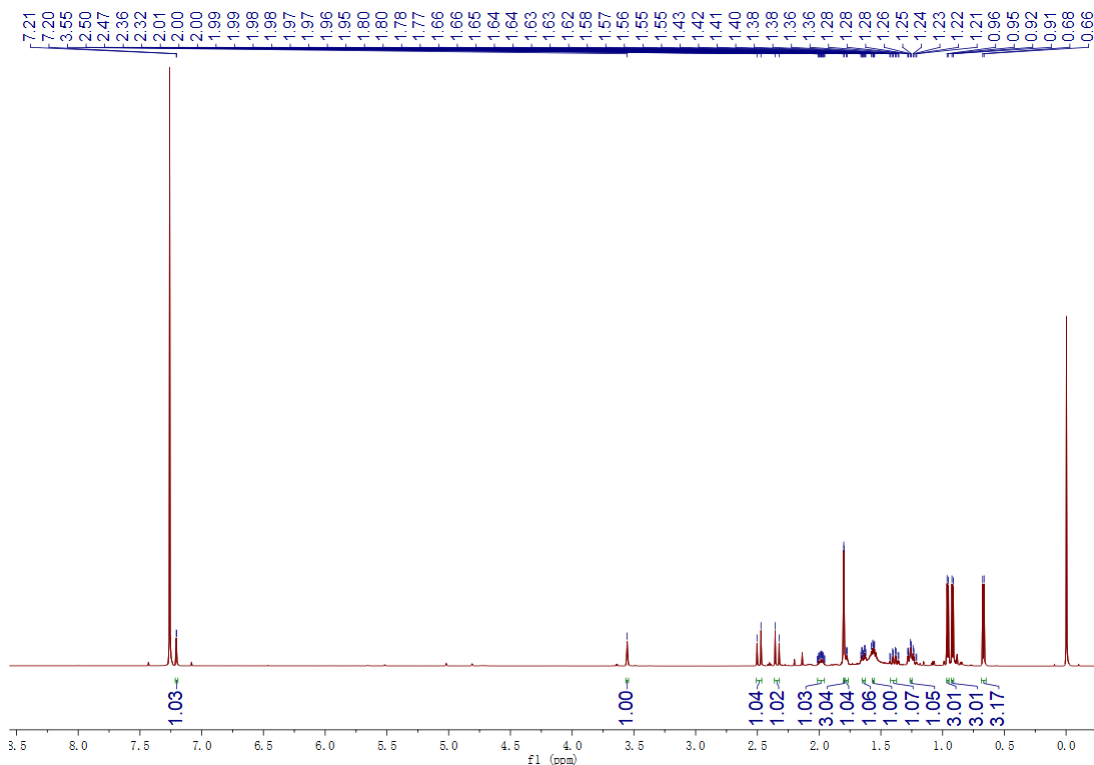

**Fig. S98  $^1\text{H}$  NMR (600 MHz,  $\text{CDCl}_3$ ) spectrum of compound 28**

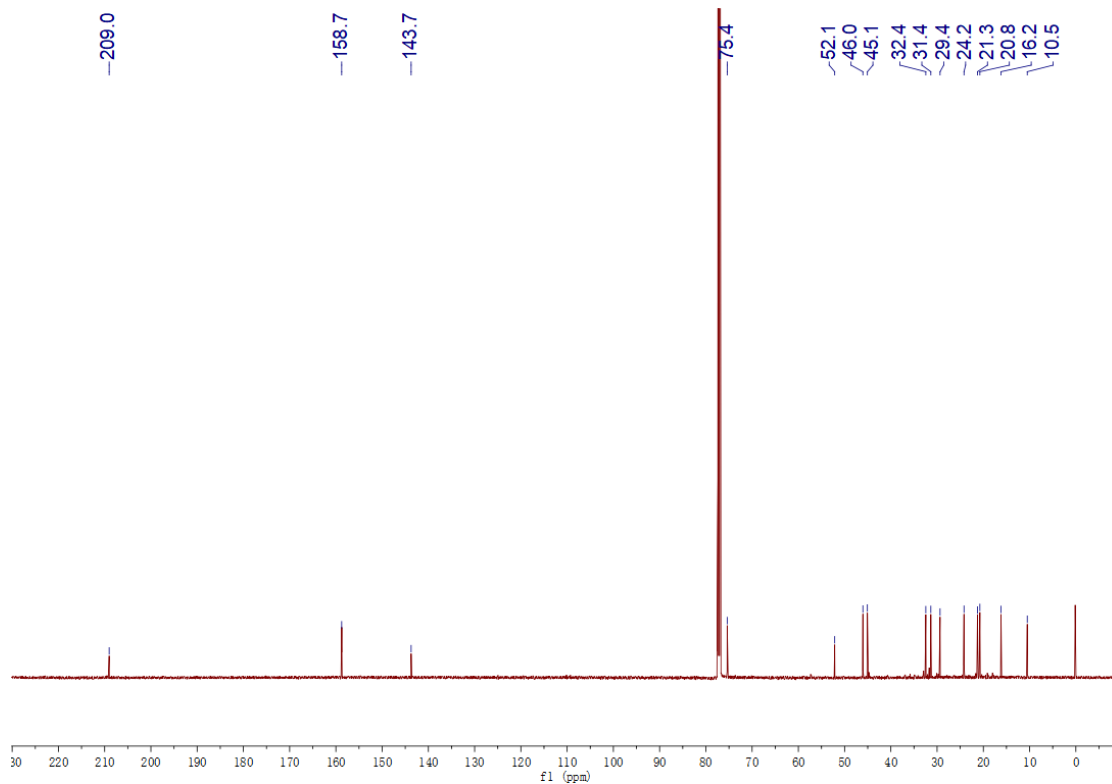

**Fig. S99  $^{13}\text{C}$  NMR (150 MHz,  $\text{CDCl}_3$ ) spectrum of compound 28**

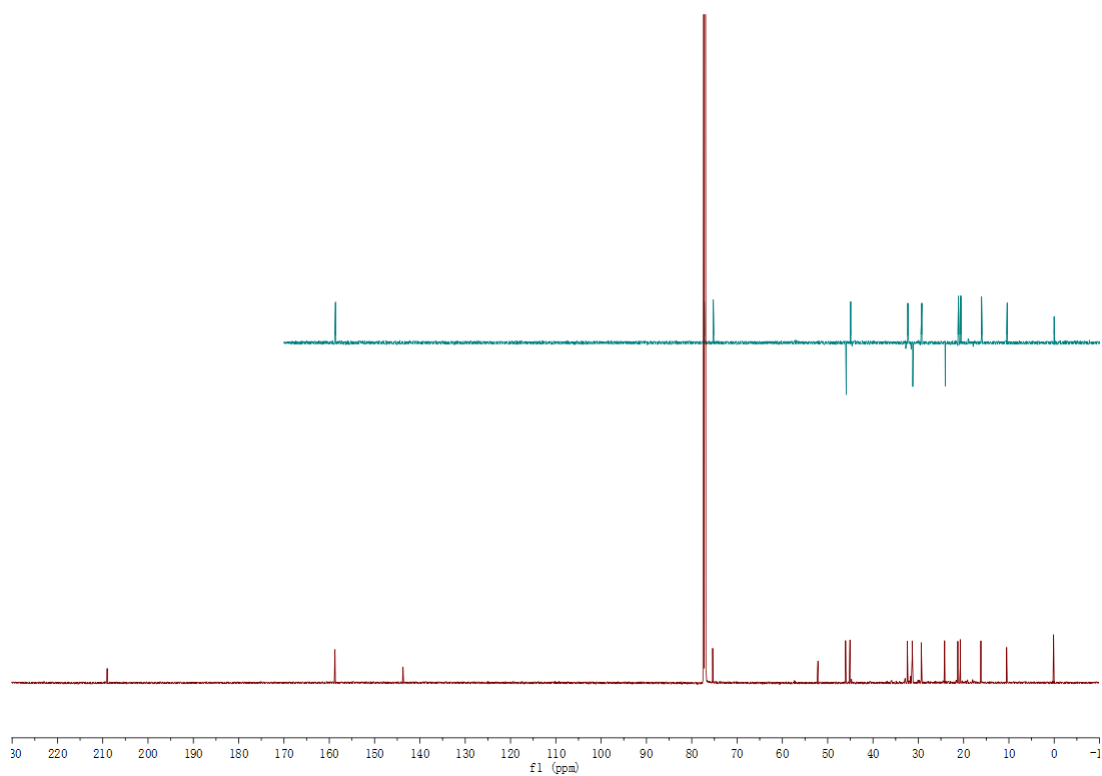



**Fig. S100 DEPT (150 MHz, CDCl<sub>3</sub>) and <sup>13</sup>C NMR spectra of compound 28**

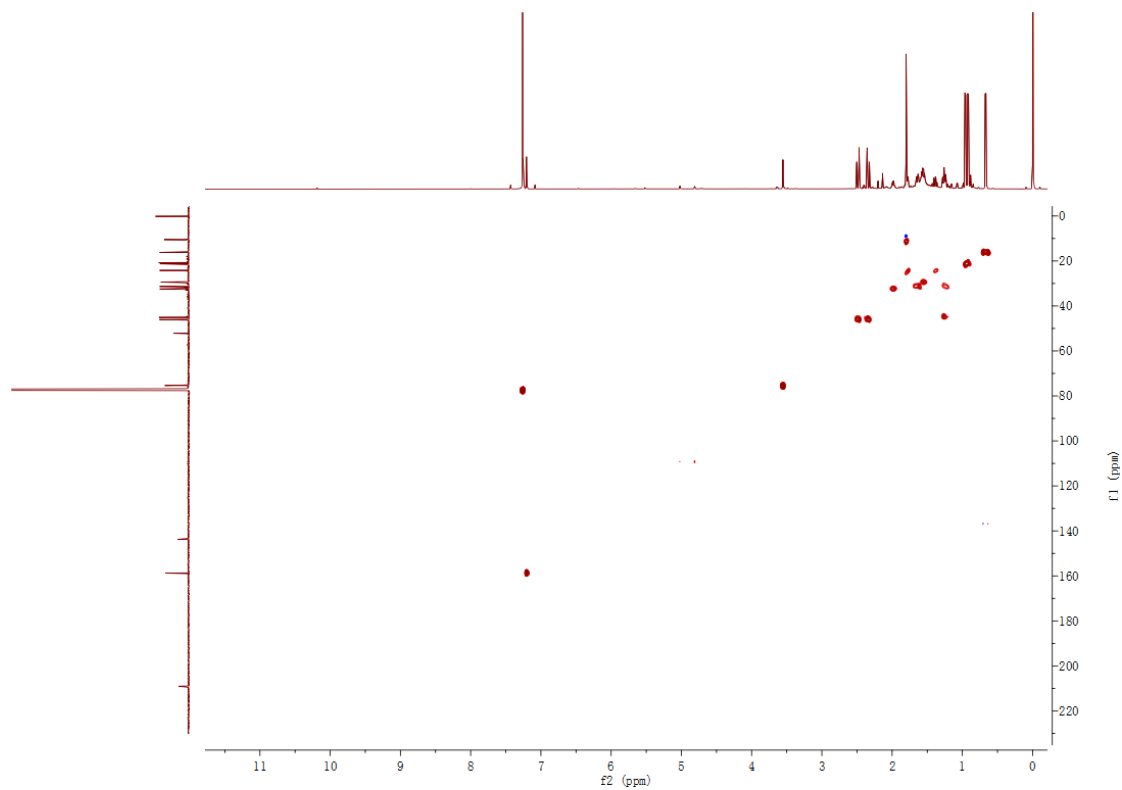

**Fig. S101 HSQC spectrum of compound 28**

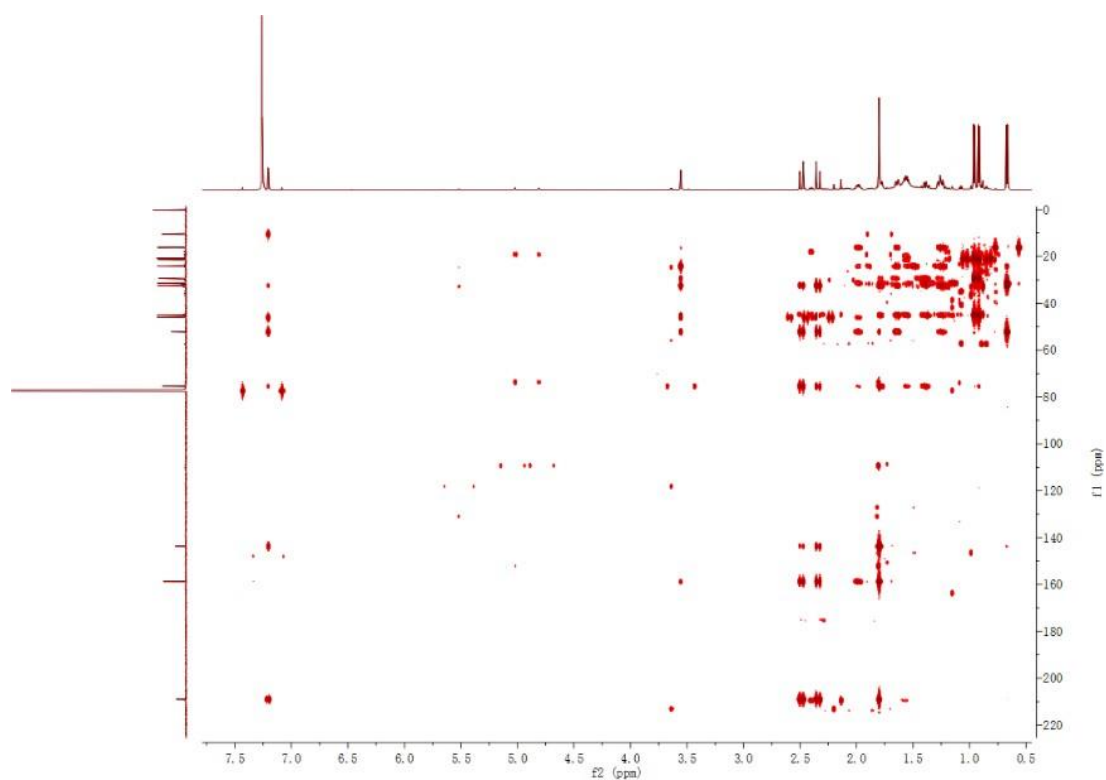

**Fig. S102 HMBC spectrum of compound 28**

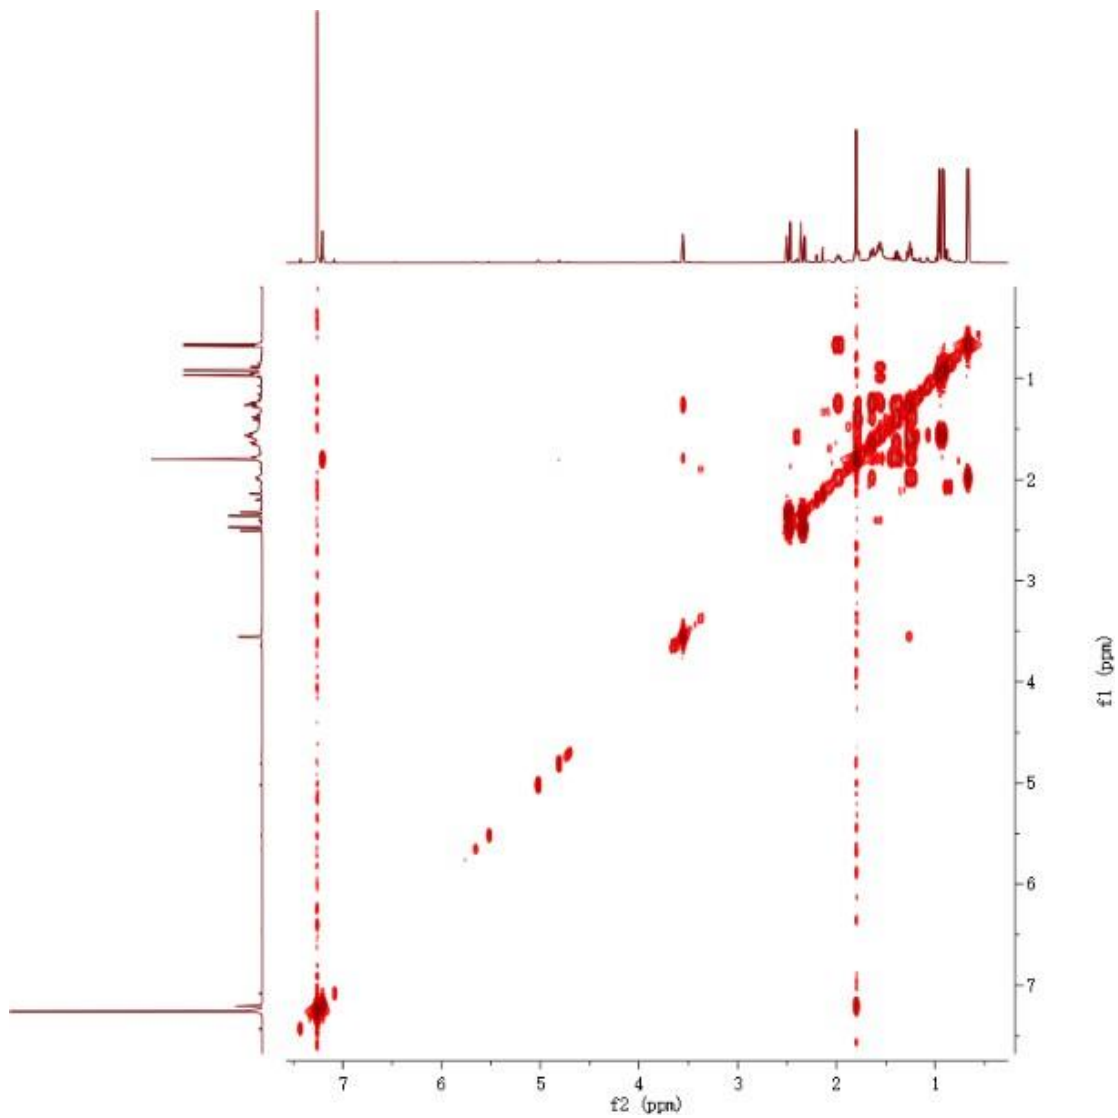

**Fig. S103 <sup>1</sup>H-<sup>1</sup>H COSY spectrum of compound 28**

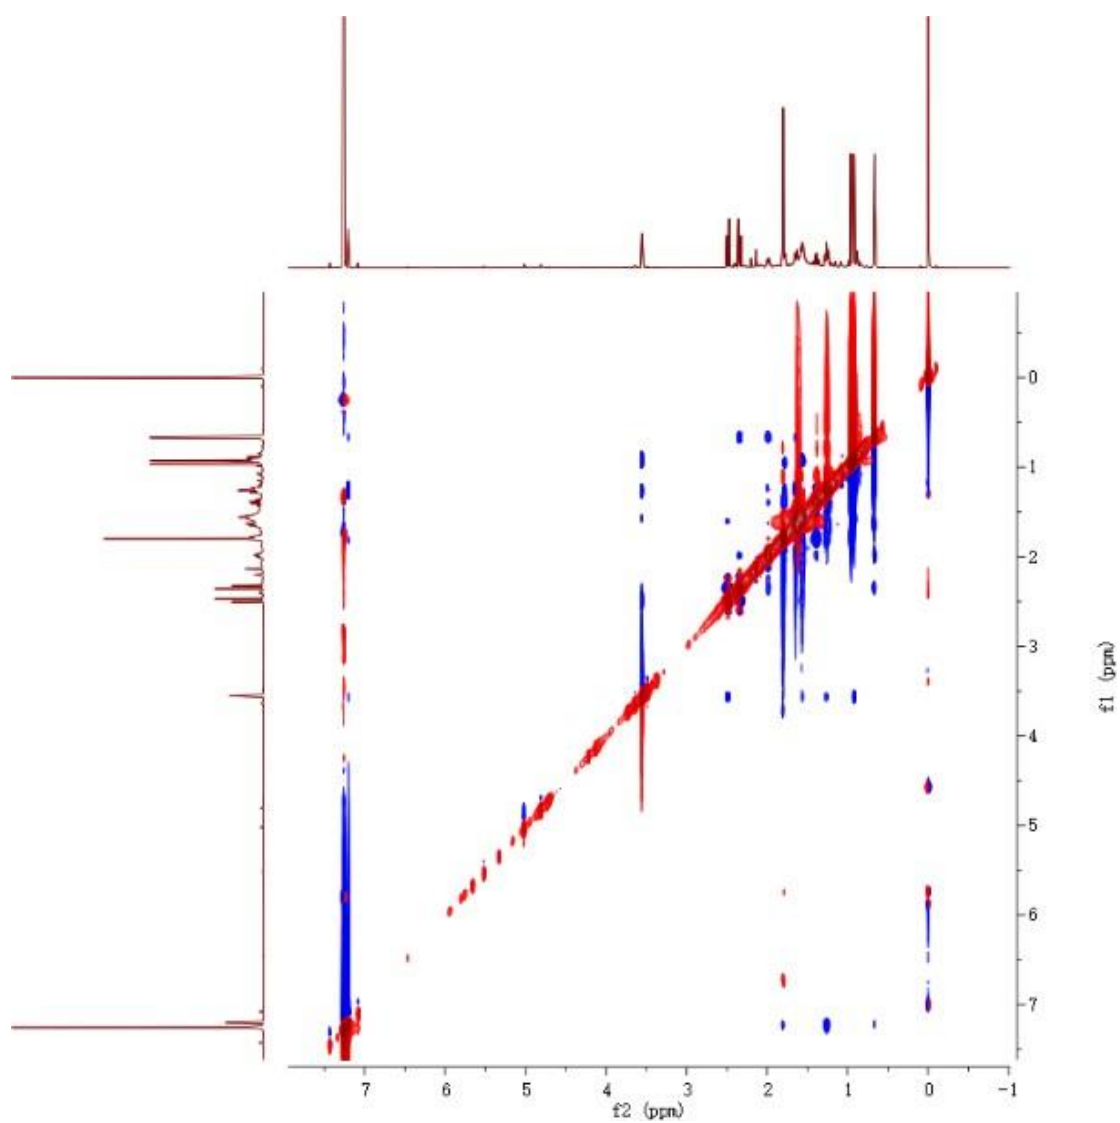

**Fig. S104** NOESY spectrum of compound **28**

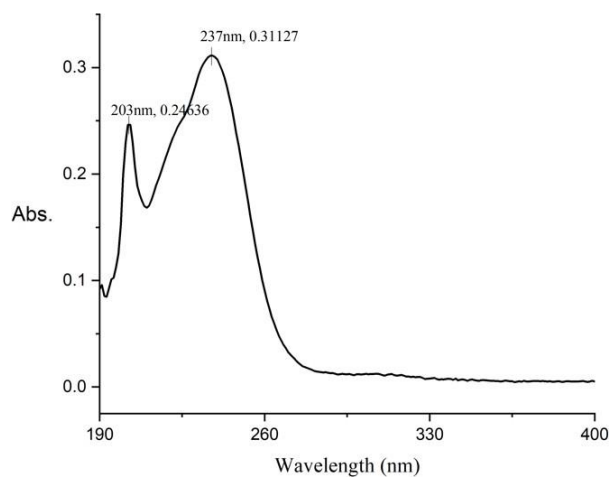

**Fig. S105 UV spectrum of compound 28**

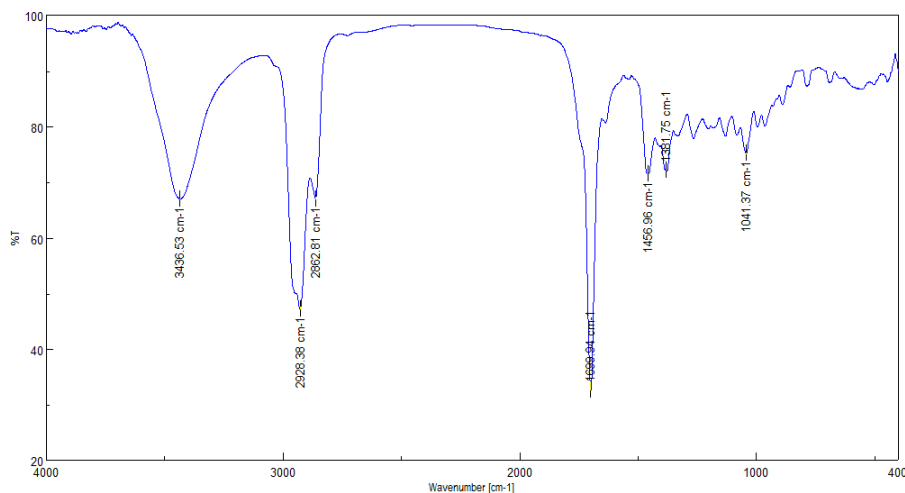

**Fig. S106 IR spectrum of compound 28**

**Elemental Composition Report**

Page 1

**Single Mass Analysis**

Tolerance = 5.0 mDa / DBE: min = -1.5, max = 50.0

Element prediction: Off

Number of isotope peaks used for i-FIT = 3

Monoisotopic Mass, Even Electron Ions

77 formula(e) evaluated with 1 results within limits (up to 50 best isotopic matches for each mass)

Elements Used:

C: 0-500 H: 0-1000 O: 0-200 Na: 0-1

AO3D3G9D4

20210712020 190 (1.533)

1: TOF MS ES+  
4.42e+003

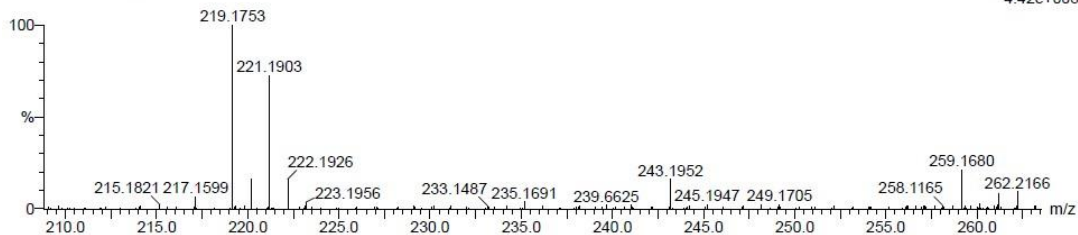

Minimum: -1.5  
Maximum: 5.0 10.0 50.0

| Mass     | Calc. Mass | mDa  | PPM   | DBE | i-FIT | Formula       |
|----------|------------|------|-------|-----|-------|---------------|
| 261.1790 | 261.1831   | -4.1 | -15.7 | 2.5 | 4.6   | C15 H26 O2 Na |

**Fig. S107 HR-ESI-MS spectrum of compound 29**

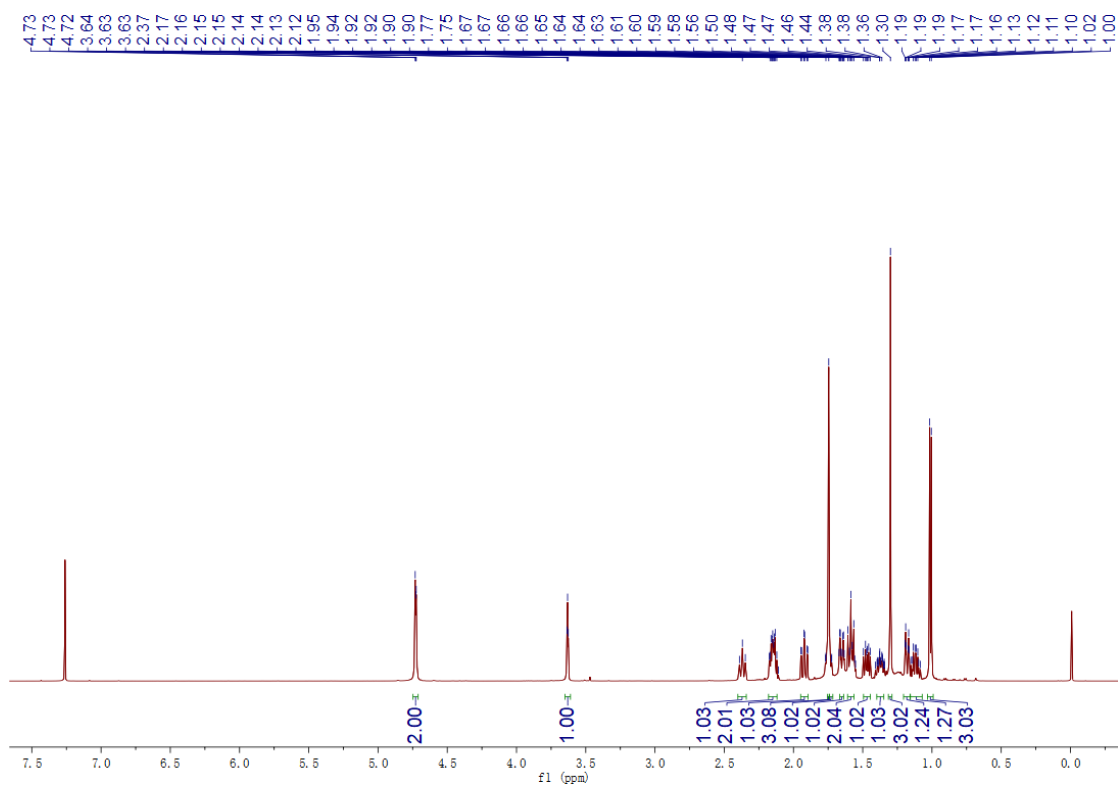

**Fig. S108  $^1\text{H}$  NMR (600 MHz,  $\text{CDCl}_3$ ) spectrum of compound 29**

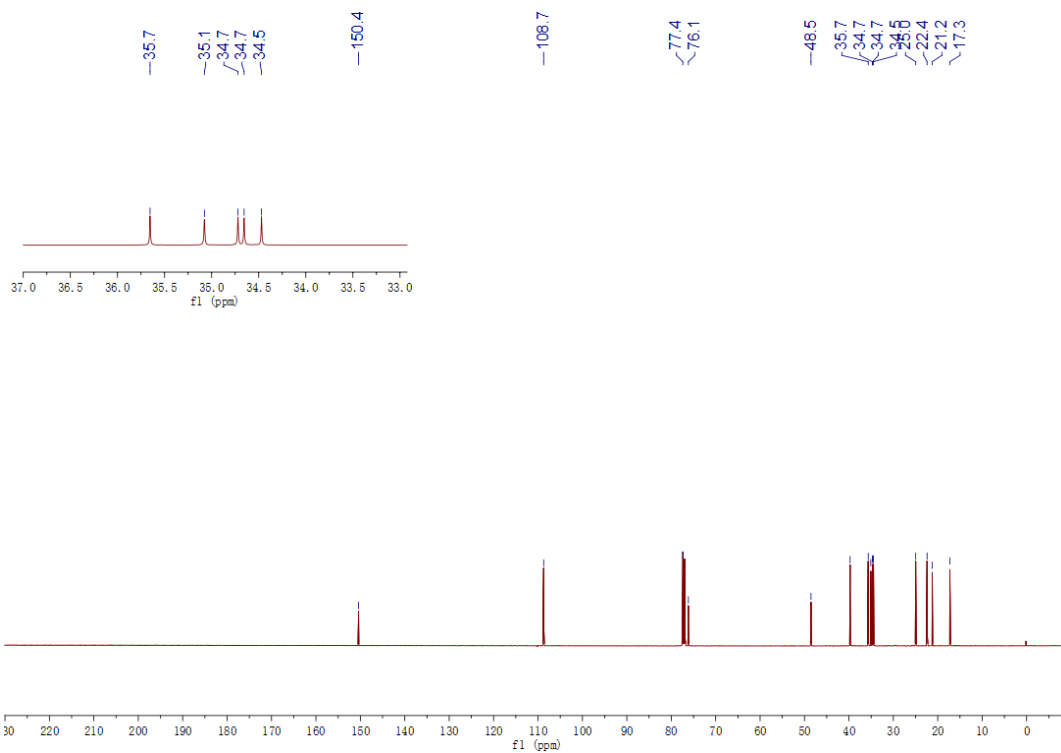

**Fig. S109  $^{13}\text{C}$  NMR (150 MHz,  $\text{CDCl}_3$ ) spectrum of compound 29**

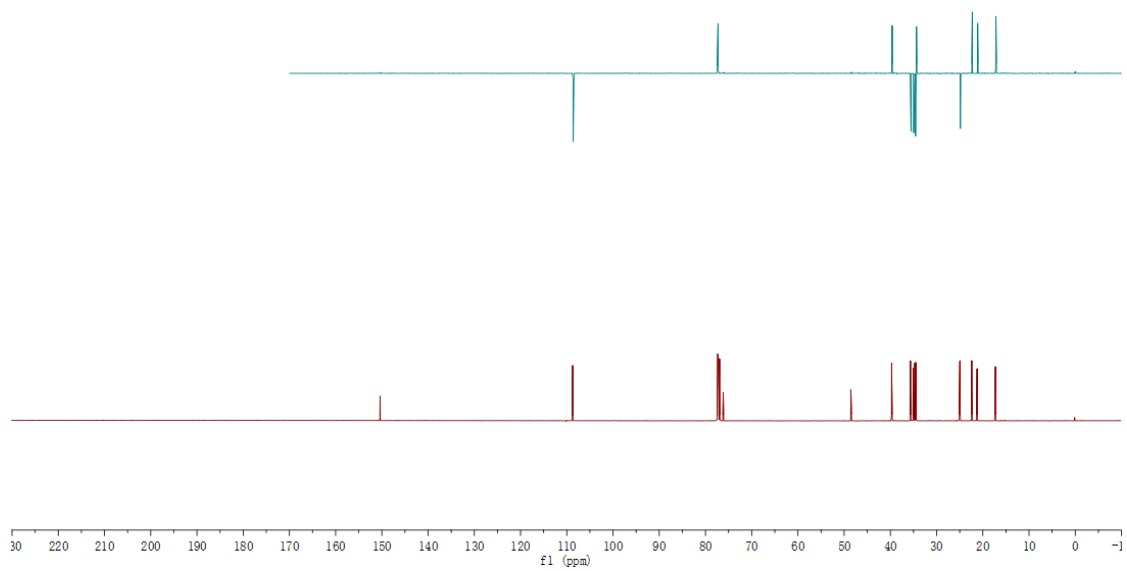

**Fig. S110 DEPT (150 MHz, CDCl<sub>3</sub>) and <sup>13</sup>C NMR spectra of compound 29**

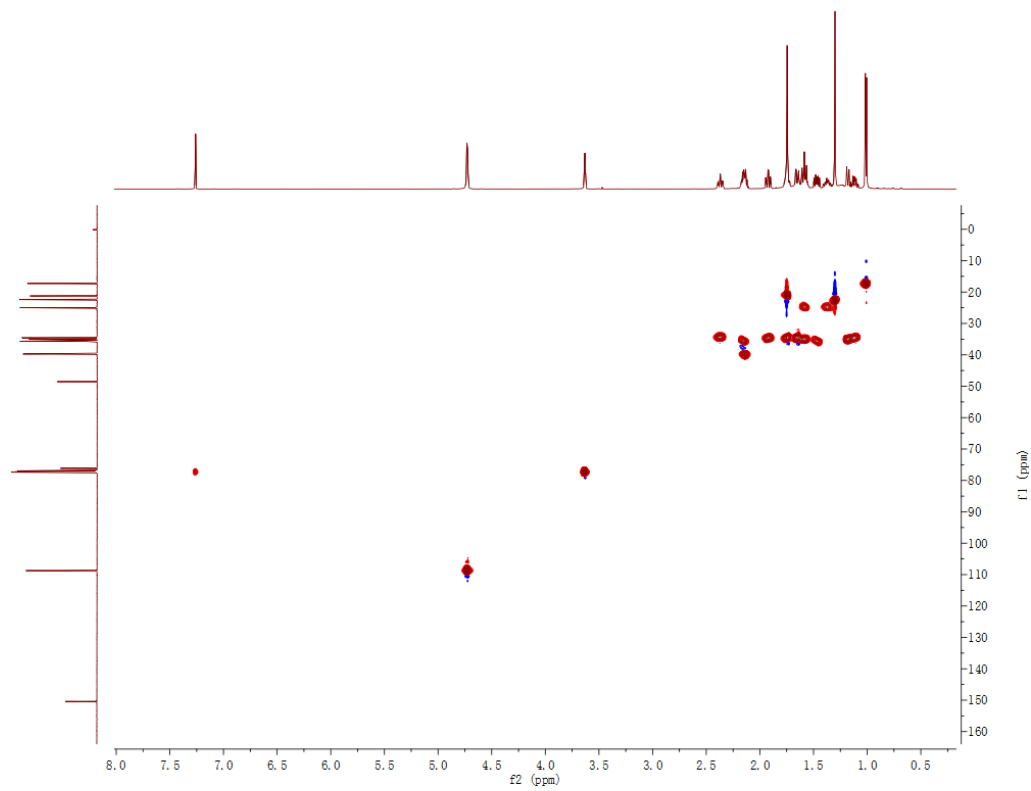

**Fig. S111 HSQC spectrum of compound 29**

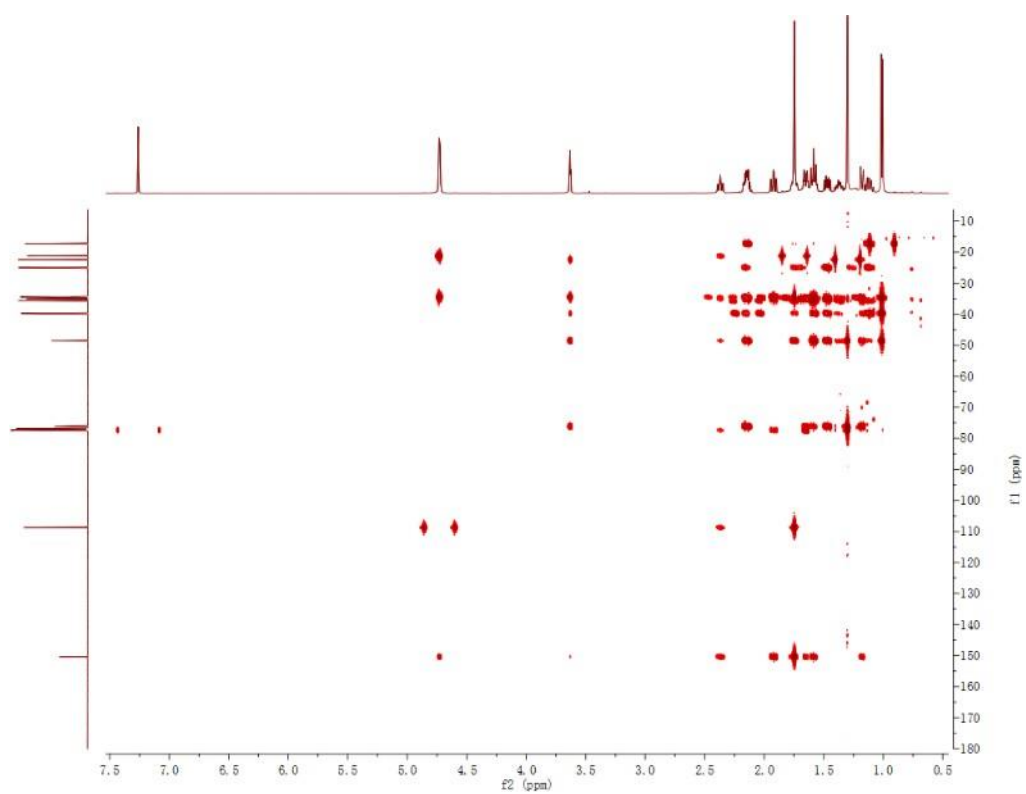

**Fig. S112** HMBC spectrum of compound **29**

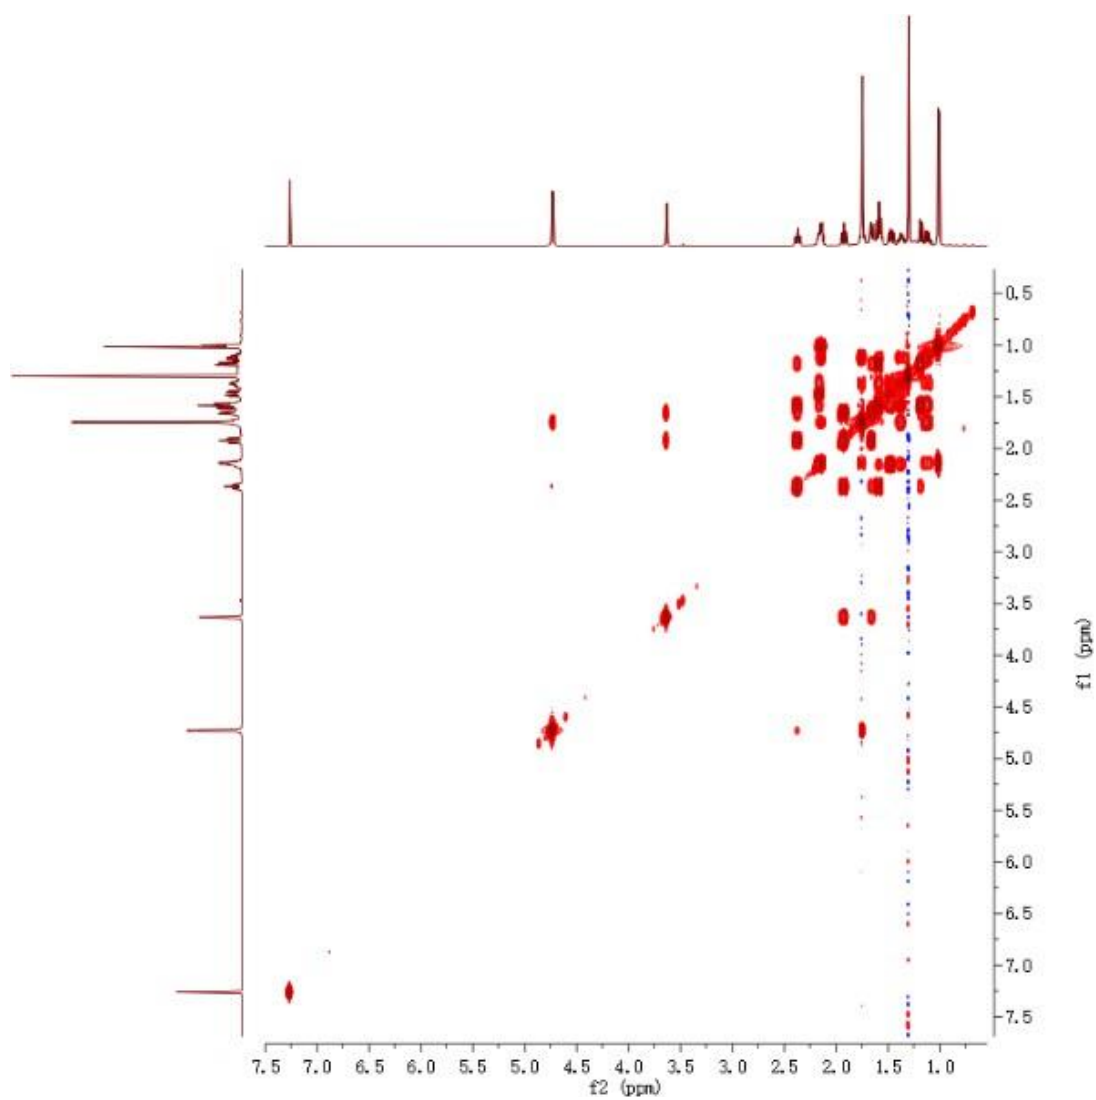

**Fig. S113**  $^1\text{H}$ - $^1\text{H}$  COSY spectrum of compound 29



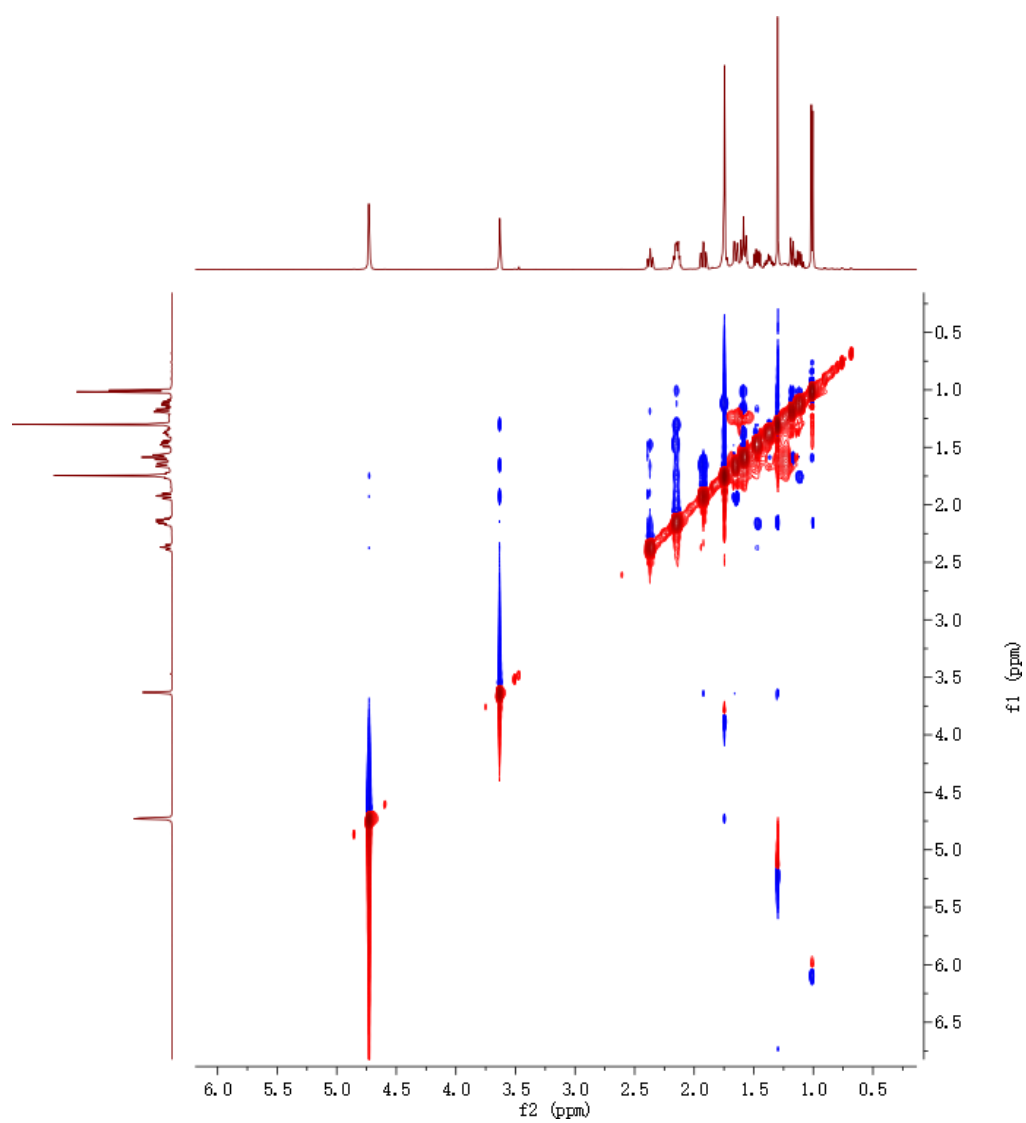

**Fig. S114** NOESY spectrum of compound **29**

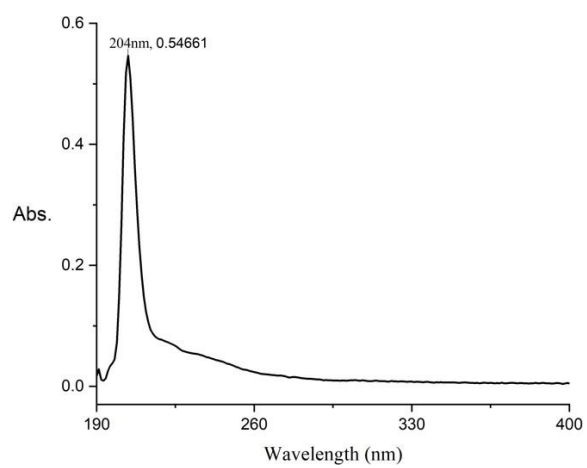

**Fig. S115 UV spectrum of compound 29**

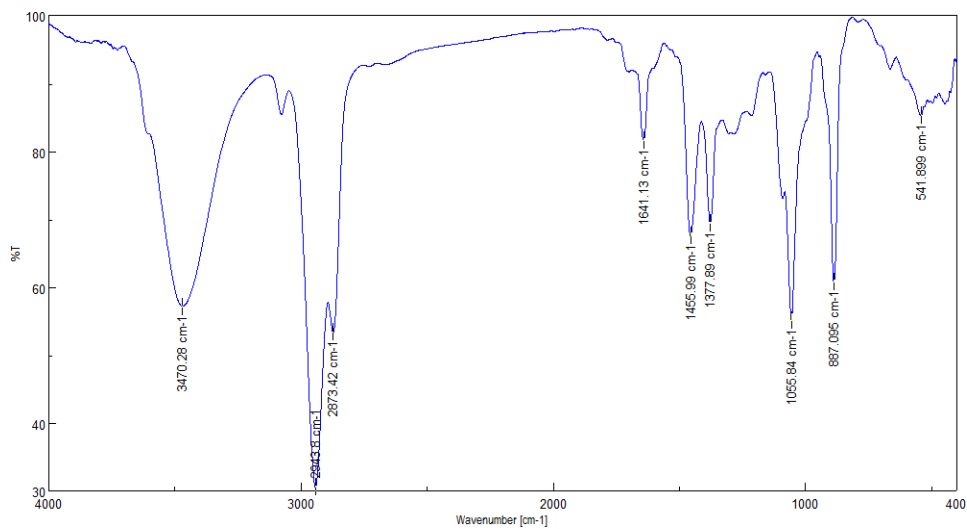

**Fig. S116 IR spectrum of compound 29**

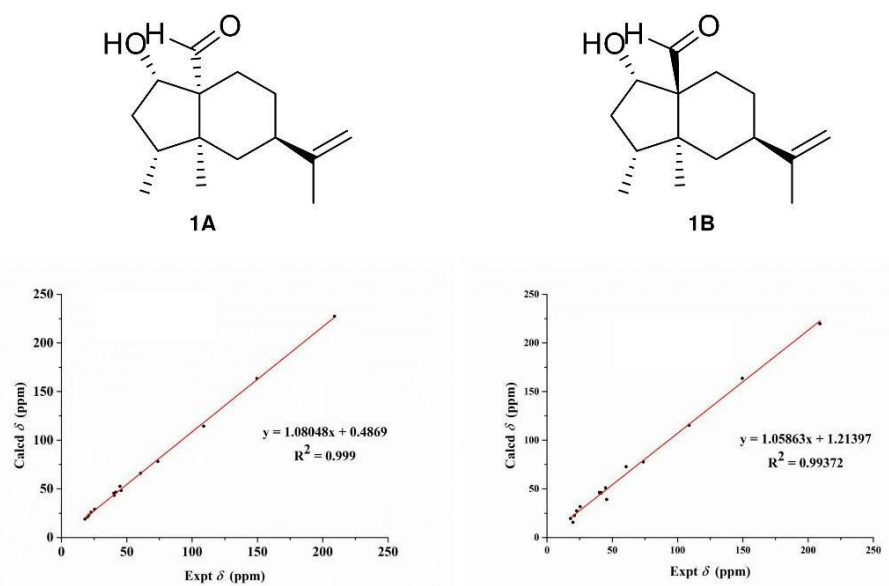

**Fig. S117** Linear correlation plots of calculated and experimental  $^{13}\text{C}$  values of two plausible epimers 1A and 1B

**Table S1.** Experimental and Calculated  $^{13}\text{C}$  NMR Chemical Shifts of 1A and 1B

| NO. | exptl. $\delta_C$ | calcd. $\delta_C$ 1A | deviation | calcd. $\delta_C$ 1B | deviation |
|-----|-------------------|----------------------|-----------|----------------------|-----------|
| 1   | 209.1             | 227.4                | 18.3      | 219.7                | 10.6      |
| 2   | 73.8              | 78.2                 | 4.4       | 77.7                 | 3.9       |
| 3   | 40.4              | 43.3                 | 2.9       | 45.7                 | 5.3       |
| 4   | 41.7              | 46.5                 | 4.8       | 46.0                 | 4.3       |
| 5   | 44.8              | 52.6                 | 7.8       | 51.1                 | 6.3       |
| 6   | 45.7              | 48.3                 | 2.6       | 39.1                 | -6.6      |
| 7   | 40.1              | 45.5                 | 5.4       | 46.4                 | 6.3       |
| 8   | 25.4              | 28.9                 | 3.5       | 31.7                 | 6.3       |
| 9   | 22.7              | 25.9                 | 3.2       | 27.3                 | 4.6       |
| 10  | 60.6              | 66.0                 | 5.4       | 72.8                 | 12.2      |
| 11  | 149.6             | 163.4                | 13.8      | 163.6                | 14.0      |
| 12  | 108.9             | 114.4                | 5.5       | 115.32               | 6.4       |
| 13  | 21.1              | 23.0                 | 1.9       | 22.61                | 1.5       |
| 14  | 19.9              | 21.0                 | 1.1       | 15.61                | -4.3      |
| 15  | 18.0              | 18.9                 | 0.9       | 19.52                | 1.5       |
|     |                   | DP4+                 | 100%      | DP4+                 | 0%        |

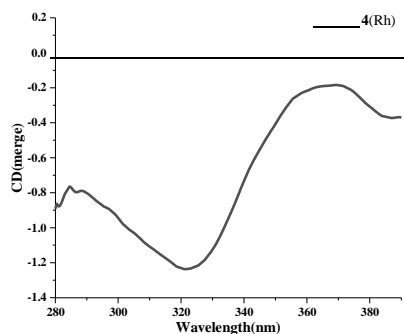

**Fig. S118**  $\text{Rh}_2(\text{OCOCF}_3)_4$ -induced CD spectra of (4*R*,5*S*,7*S*,9*R*)-eremophila-1(10),11-dien-9-ol (4)

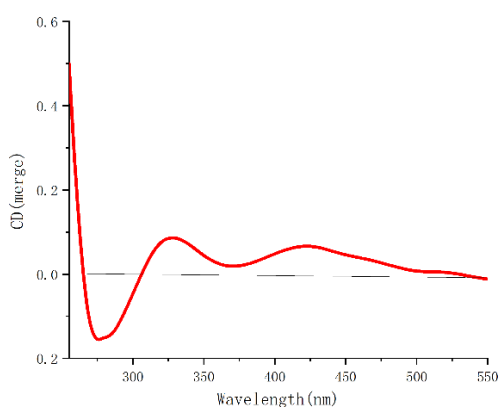

**Fig. S119** CD spectra of *in situ* formed Mo-complexes of 6 recorded in DMSO after 0.5 h from dissolving in the 1:1 ligand-to-metal ratio

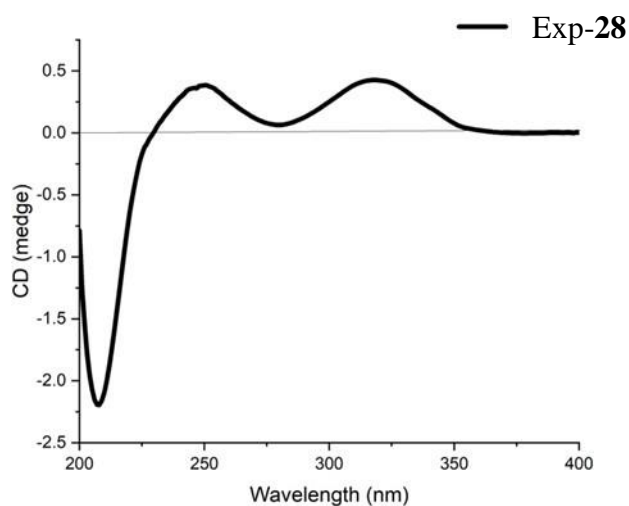

**Fig. S120** CD spectra of compounds 28

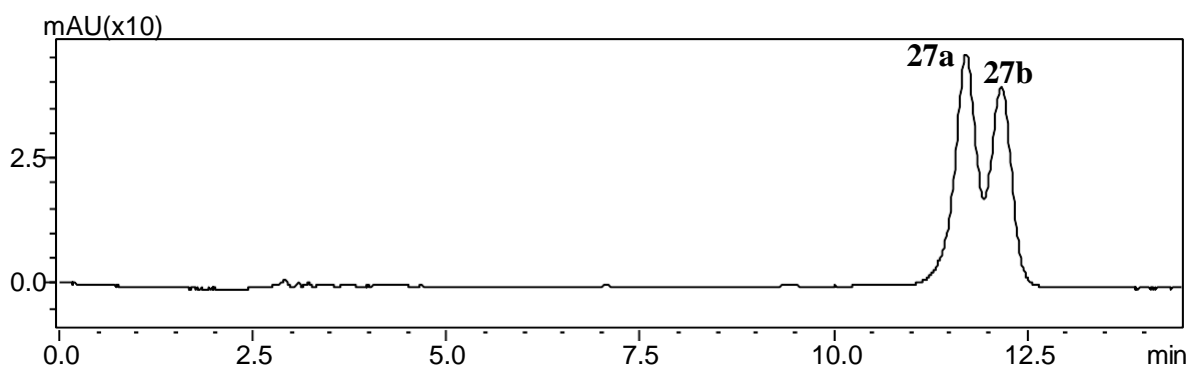

Fig. S121 Chiral HPLC chromatogram of compound 27

Table S2. Primers for qPCR

| Gene          | Forward                  | Reverse               |
|---------------|--------------------------|-----------------------|
| TNF- $\alpha$ | CCCTCACACTCAGATCATCTTCT  | GCTACGACGTGGGCTACAG   |
| IL-6          | TAGTCCTTCCTACCCCAATTTC   | TTGGTCCTTAGCCACTCCTTC |
| Actin         | GTCGTACCACAGGCATTGTGATGG | GCAATGCCTGGGTACATGGTG |
| iNOS          | CTGGCTGCCTTGTTCAGCTA     | AGTGTAGCGTTTCGGGATCT  |
| COX-2         | TGCTGTACAAGCAGTGGCAA     | AGGTGCTCGGCTTCCAGTAT  |

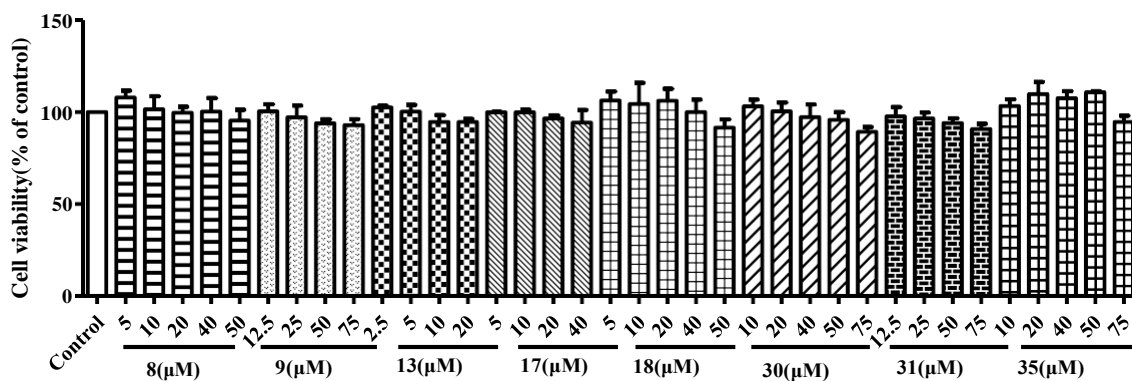

Fig. S122 Effects of different concentrations of compounds ( $IC_{50}$ ) alone on cell viability

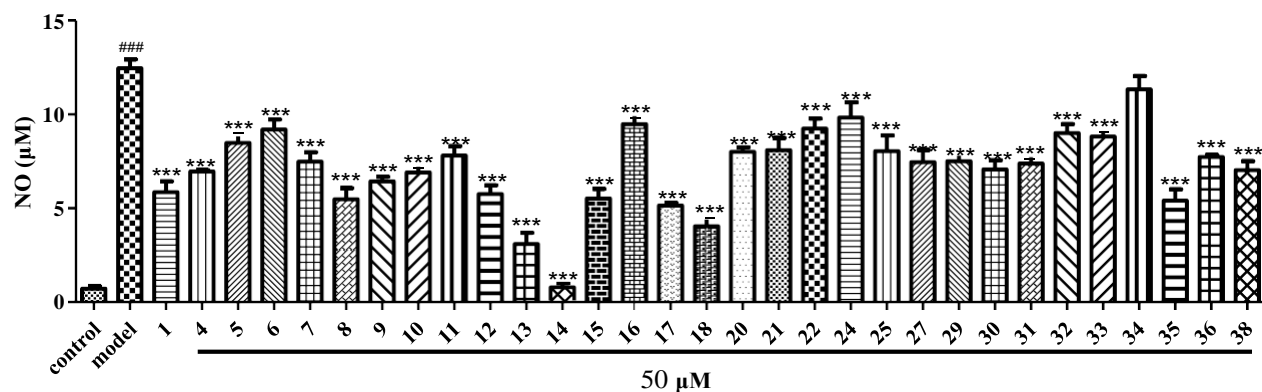

Fig. S123 NO inhibitions of all the isolated compounds at 50 Mm

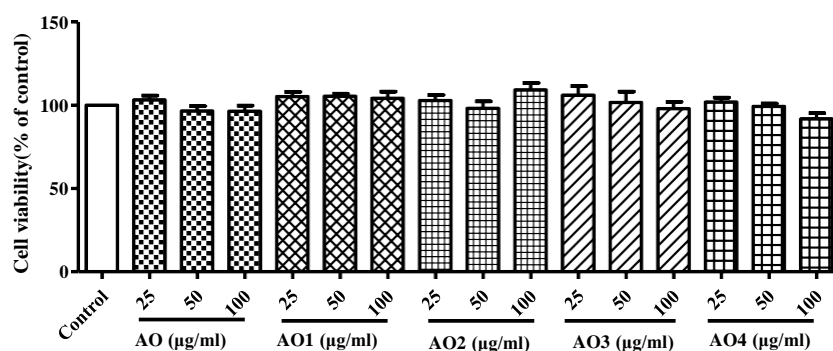

Fig. S124 Effects of different fractionations of *A. oxyphylla* on cell viability. Data represent means  $\pm$  SD, n=3.

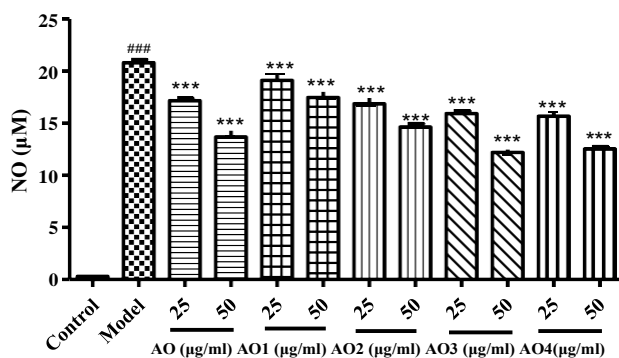

Fig. S125 NO inhibitions of different fractionations. Data represent means  $\pm$  SD, n=3; ###P < 0.001, \*P < 0.05, \*\*P < 0.01, vs LPS.
